# Supplementary material for: Evaluation of the anti-proliferative activity of 2-oxo-pyridine and 1′H-spiro-pyridine derivatives as a new class of EGFRWtand VEGFR-2 inhibitors with apoptotic inducers
Source: Royal Society of Chemistry journal article supplement (doi:10.1039/d3ra00887h), 2023-01-01
Supplement: d3ra00887h1.pdf [file d3ra00887h1.pdf]

**Evaluate the anti-proliferative activity of 2-oxo-pyridine and 1'*H*-spiro-pyridine derivatives as a new class of EGFR<sup>Wt</sup> and VEGFR-2 inhibitors with apoptotic inducers**

Reham R. Raslan<sup>1</sup>, Yousry A. Ammar<sup>2,\*</sup>, Sawsan A. Fouad<sup>1</sup>, Sadia A. Hessein<sup>1</sup>, Nadia A. M. Shmiess<sup>1</sup>, and Ahmed Ragab<sup>2,\*</sup>

<sup>1</sup>Department of Chemistry, Faculty of Science (Girls), Al-Azhar University, Nasr City, Cairo, Egypt.

<sup>2</sup>Department of Chemistry, Faculty of Science (Boys), Al-Azhar University, Nasr City, 11884, Cairo, Egypt.

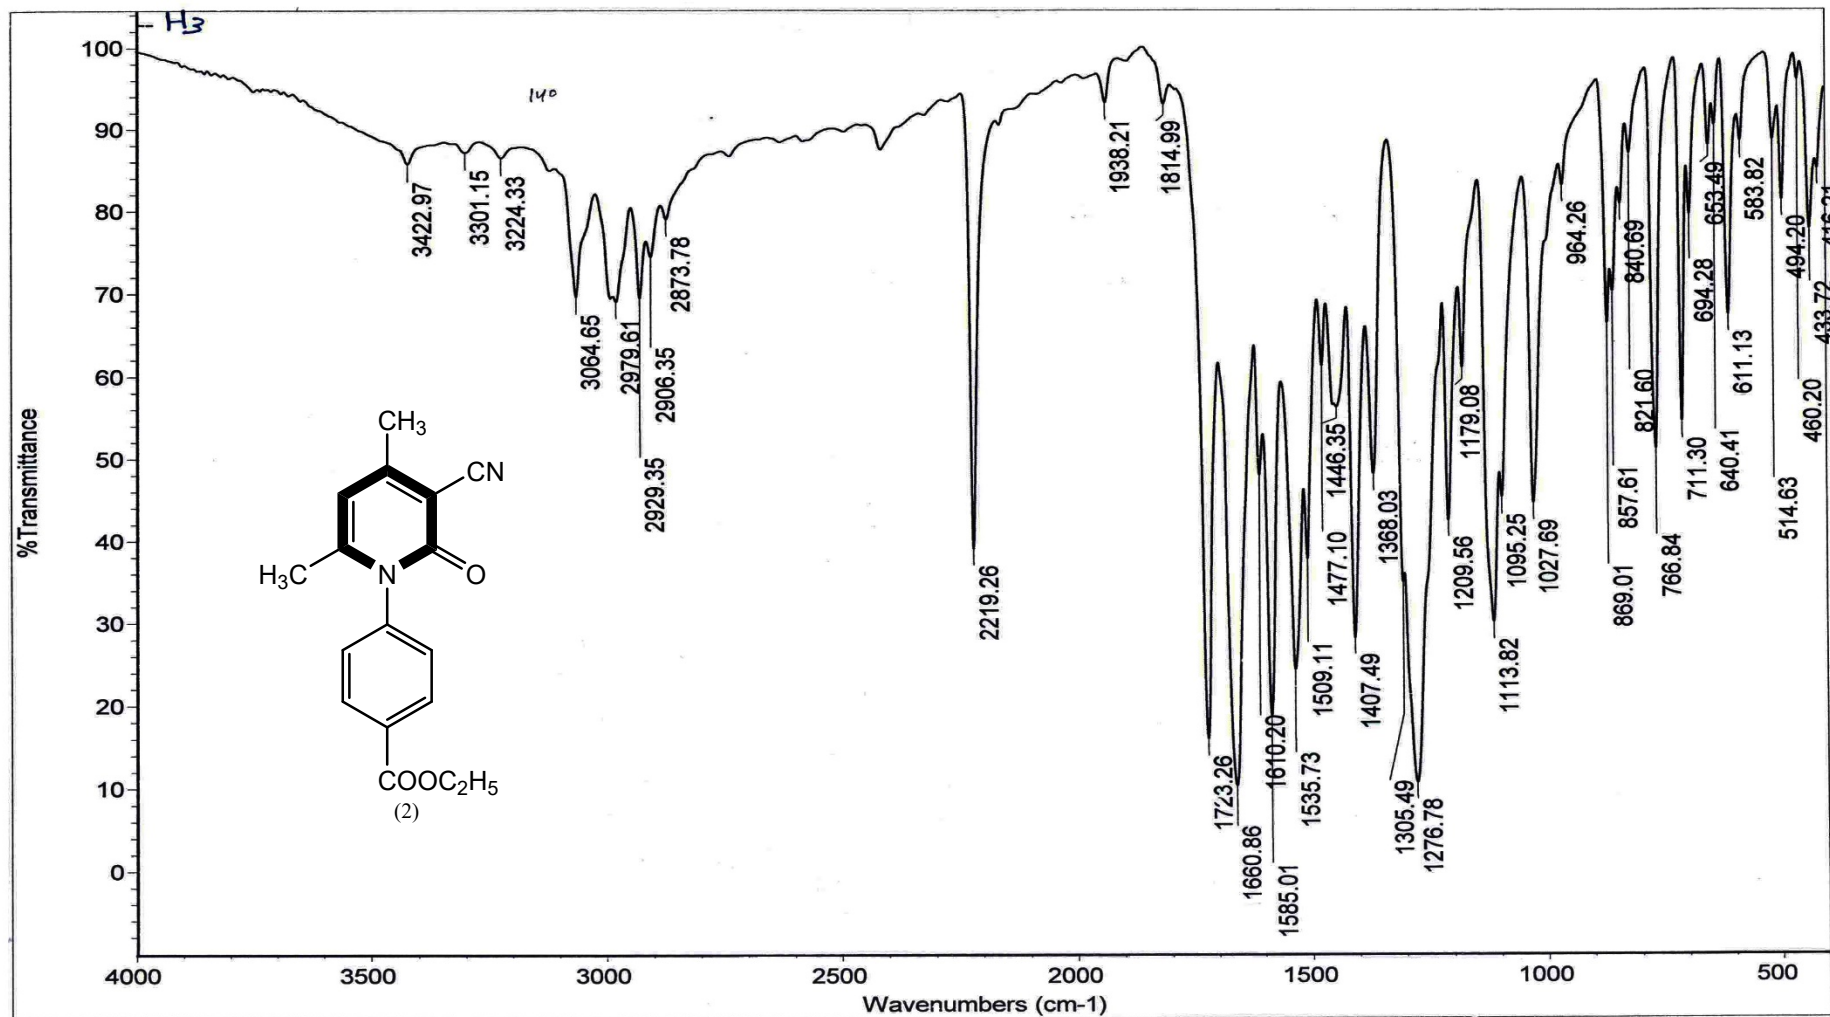

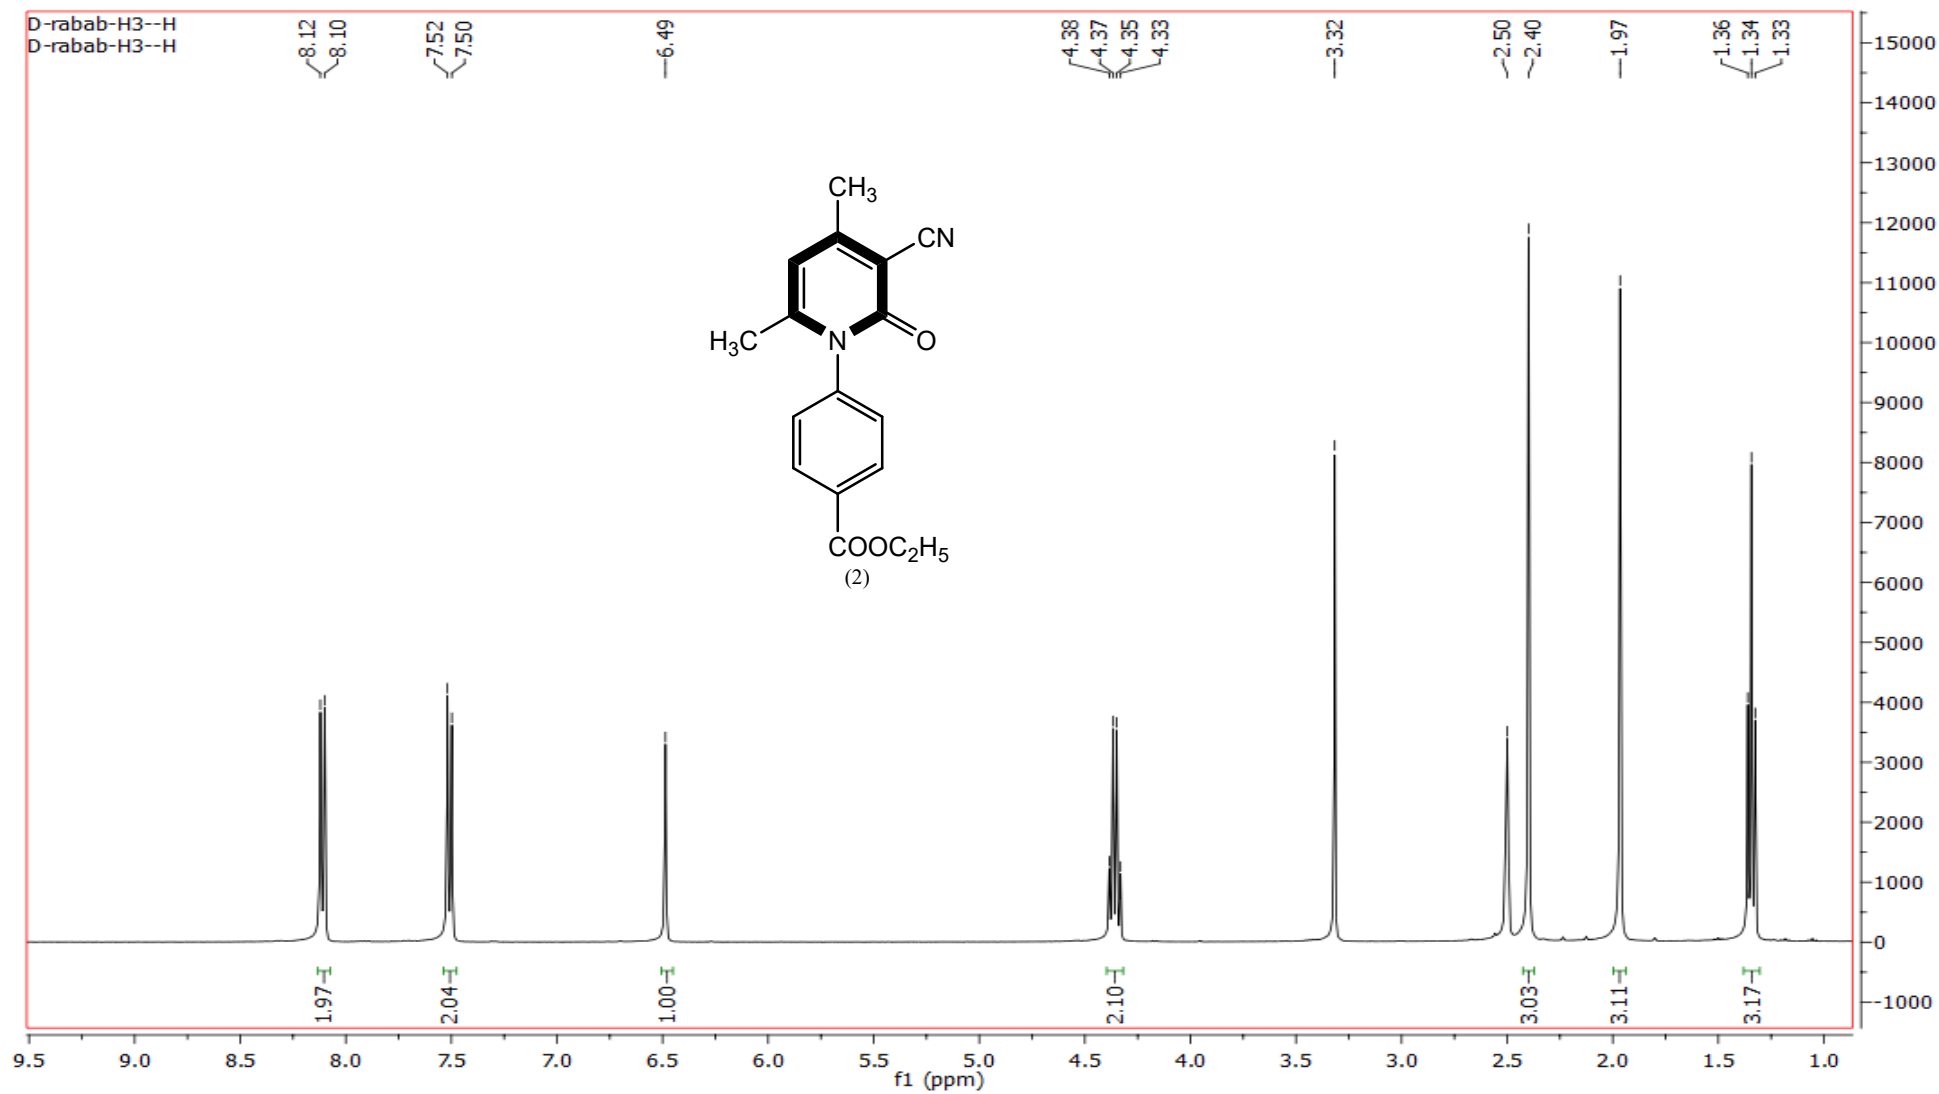

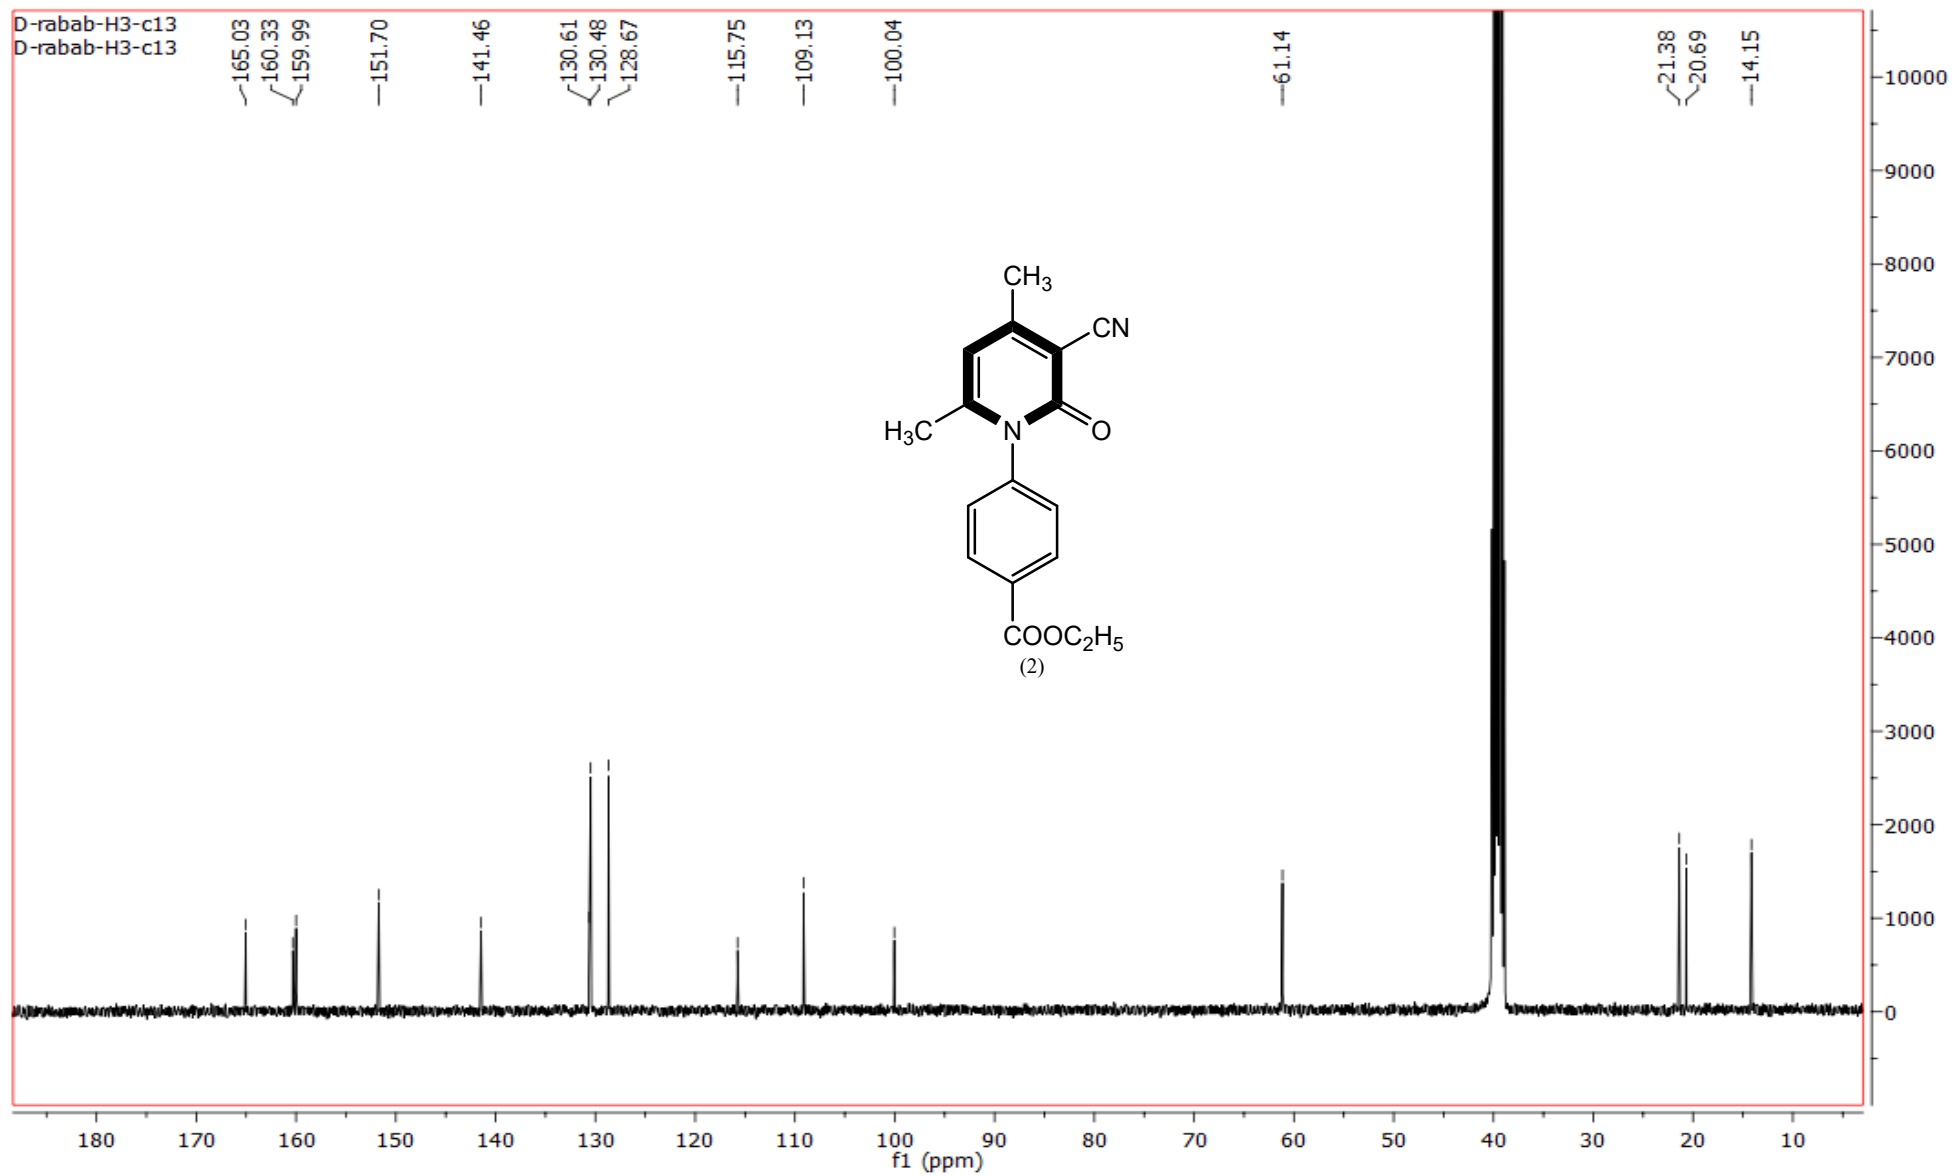

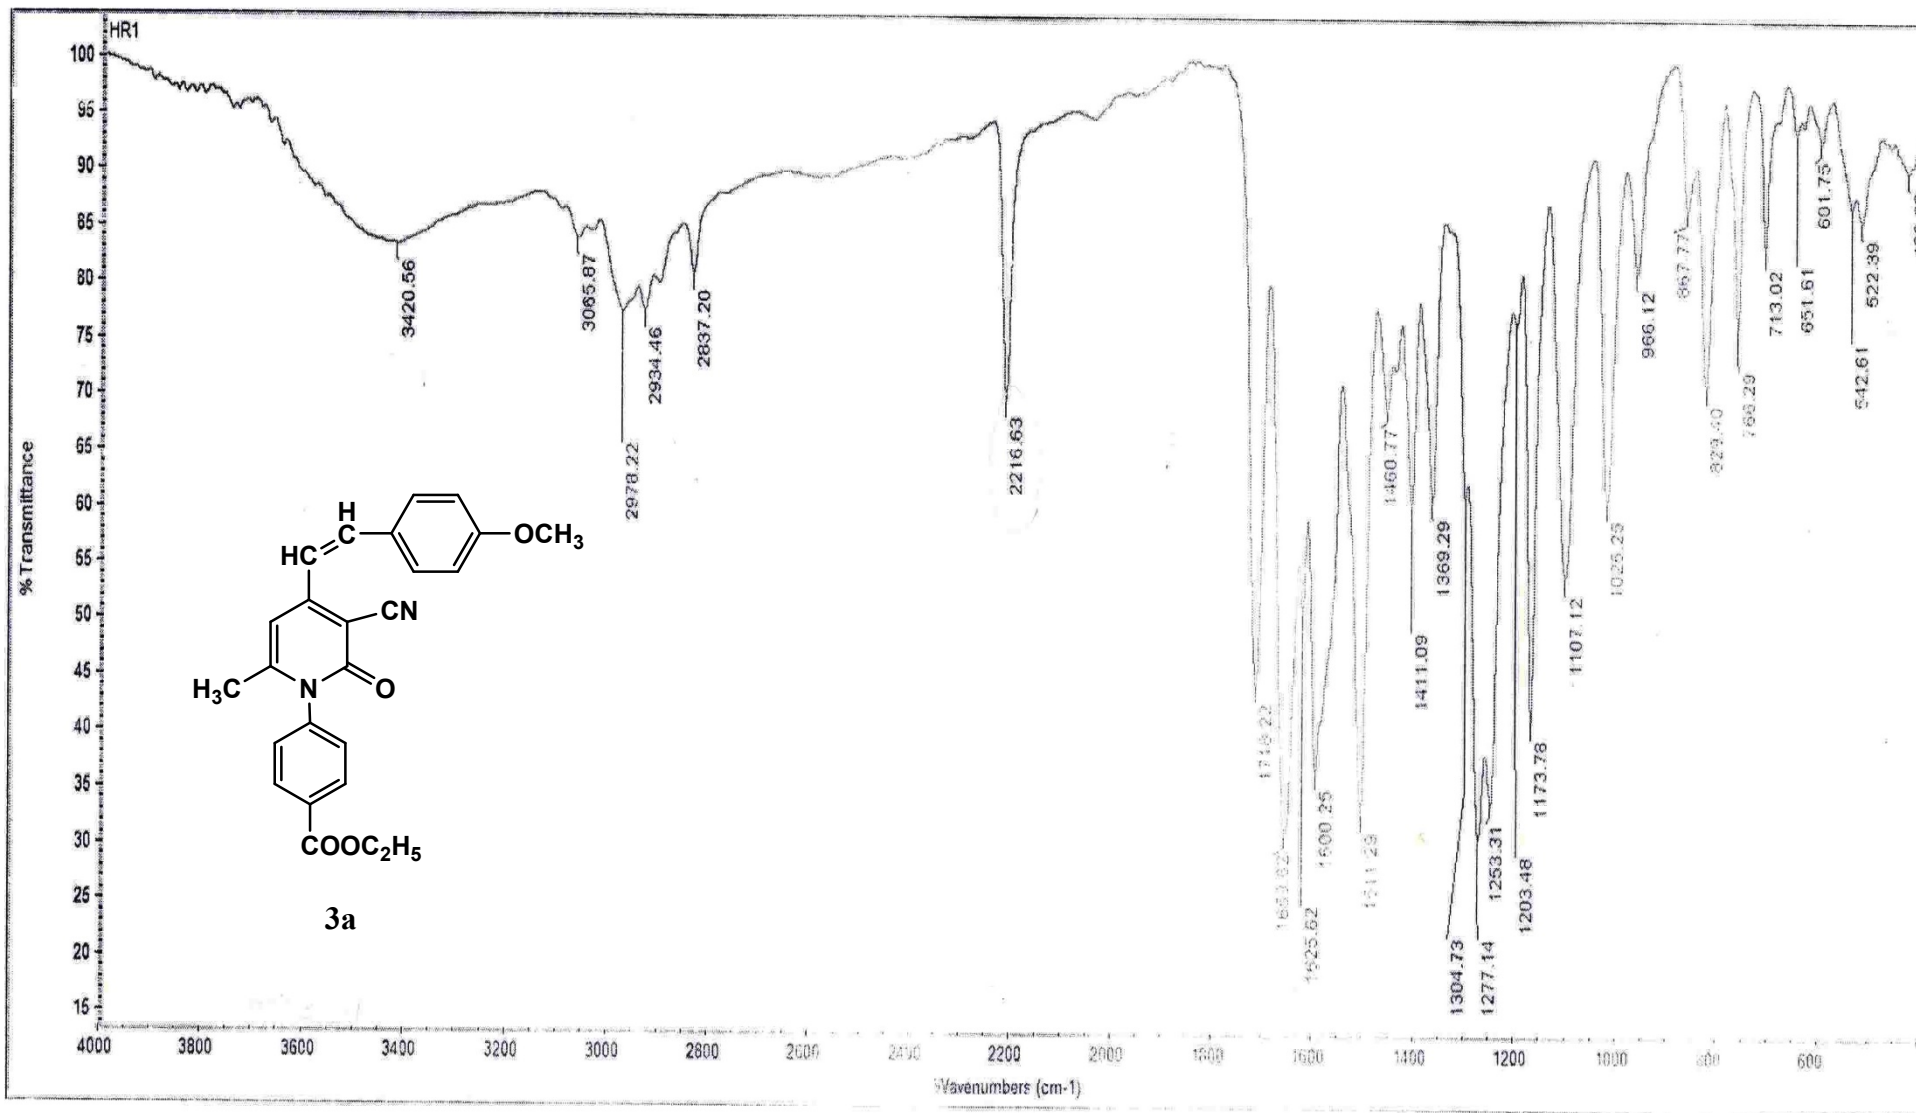

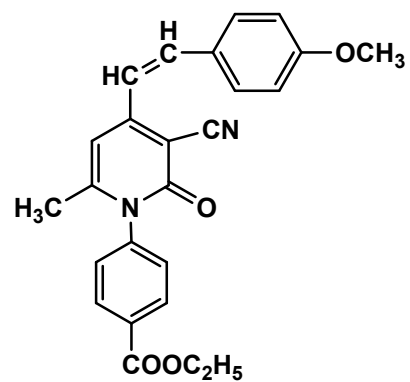

3a

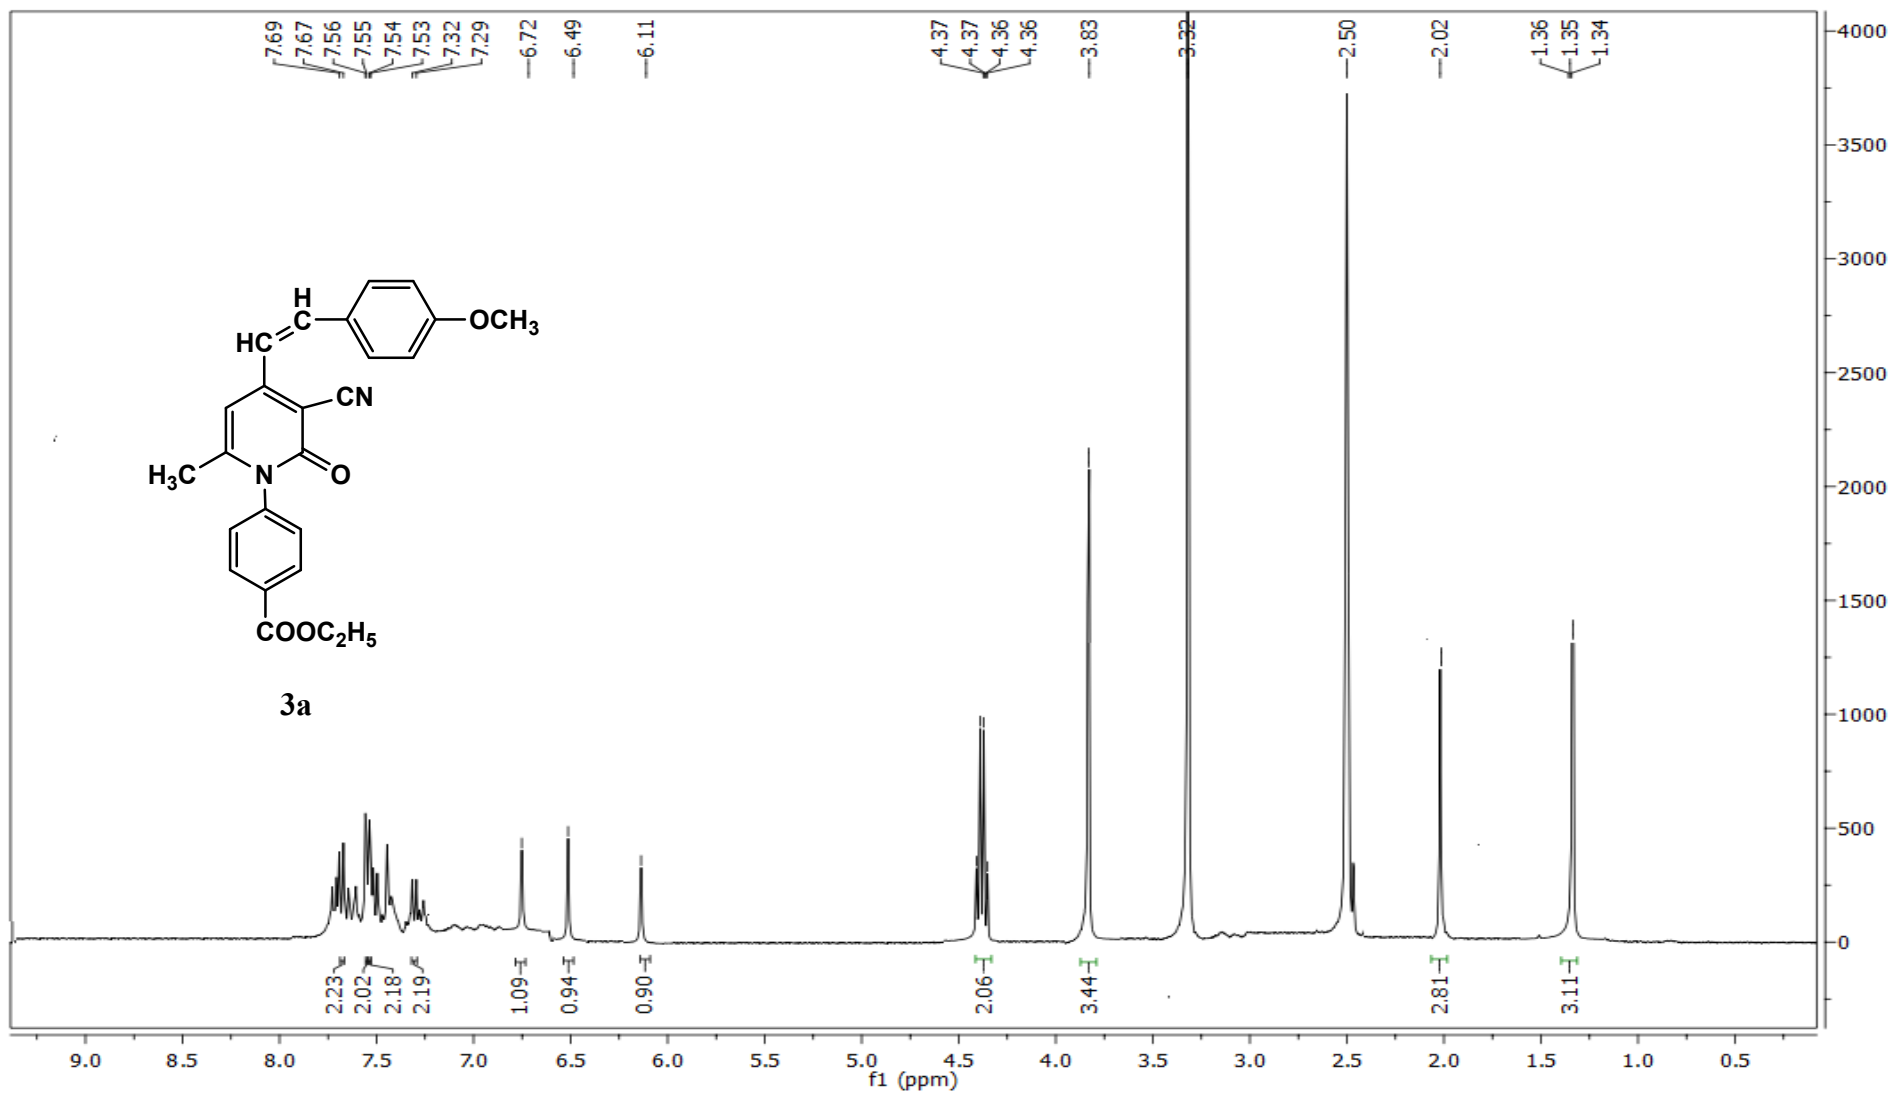

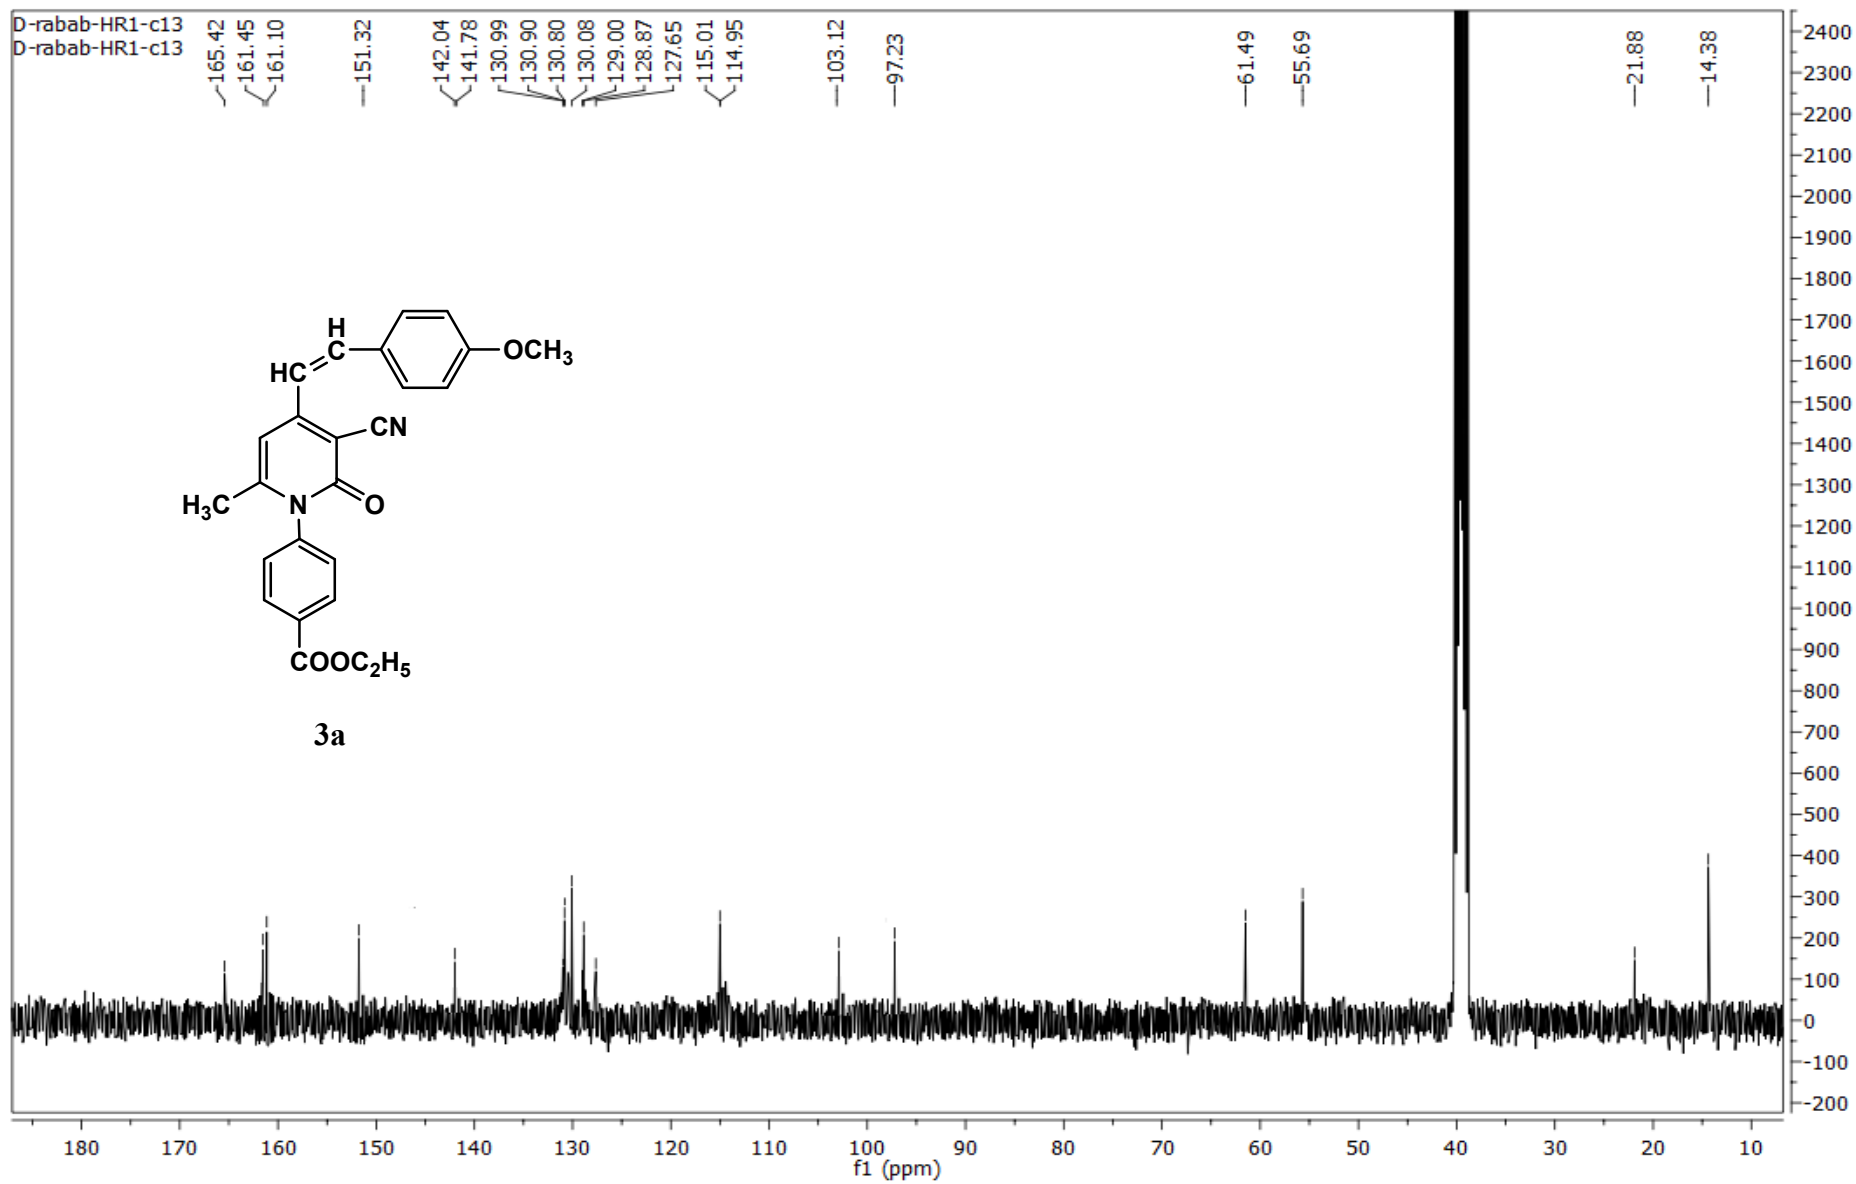

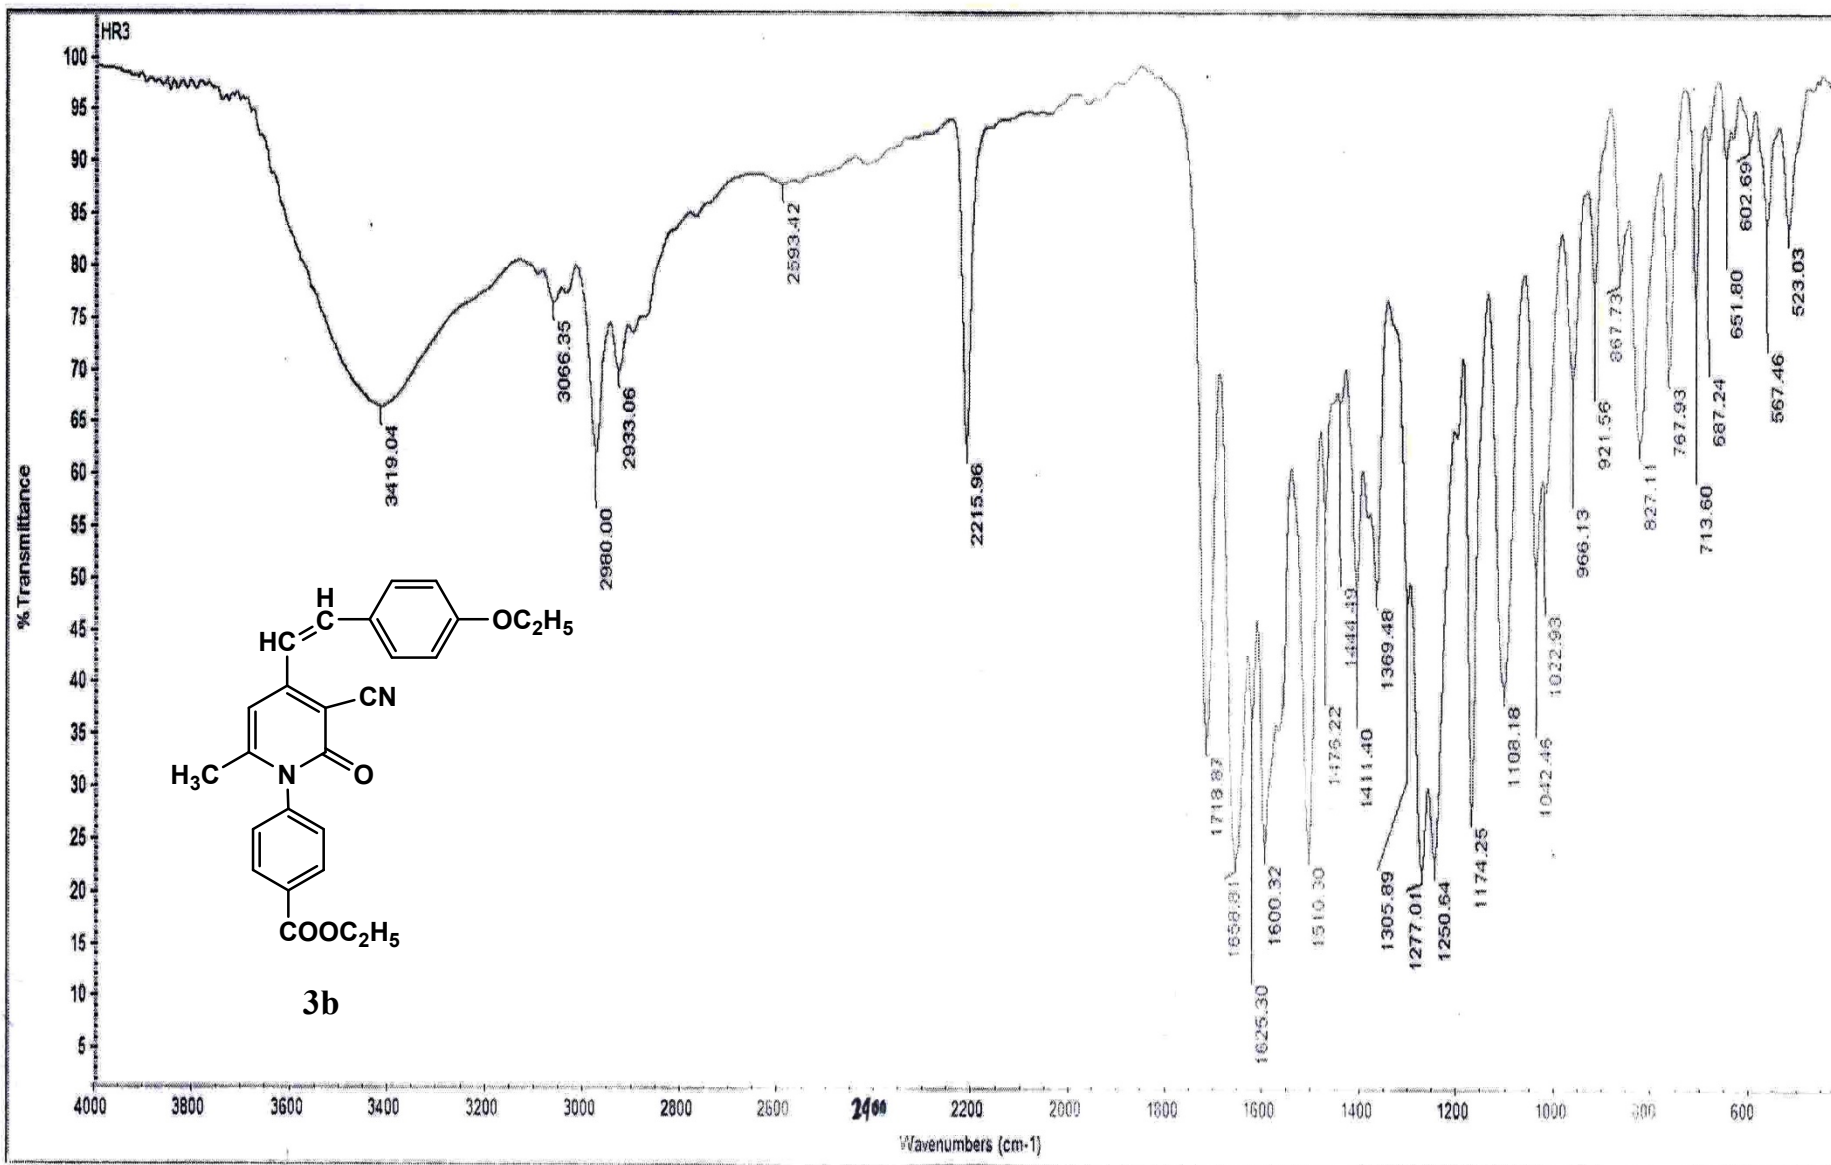



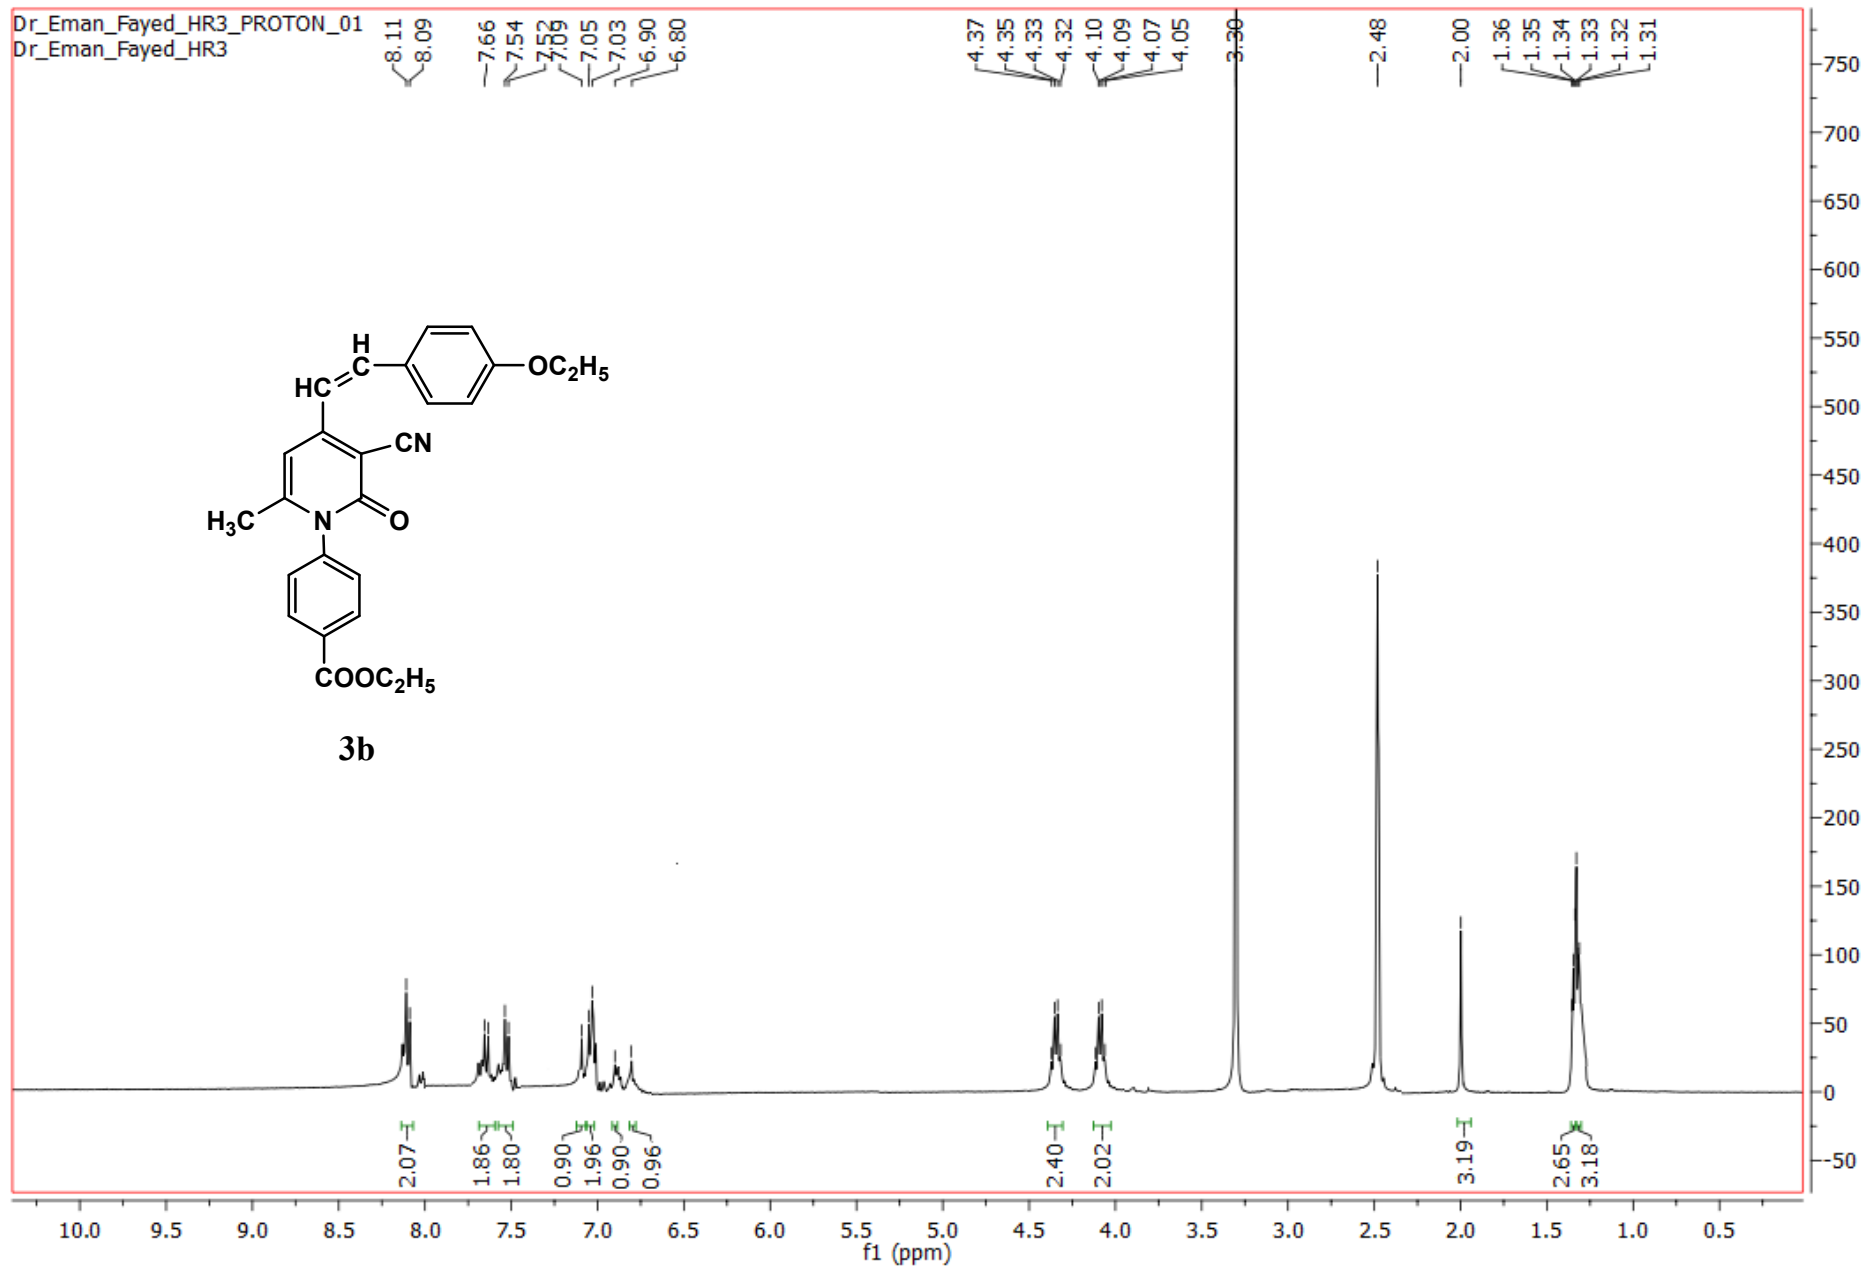

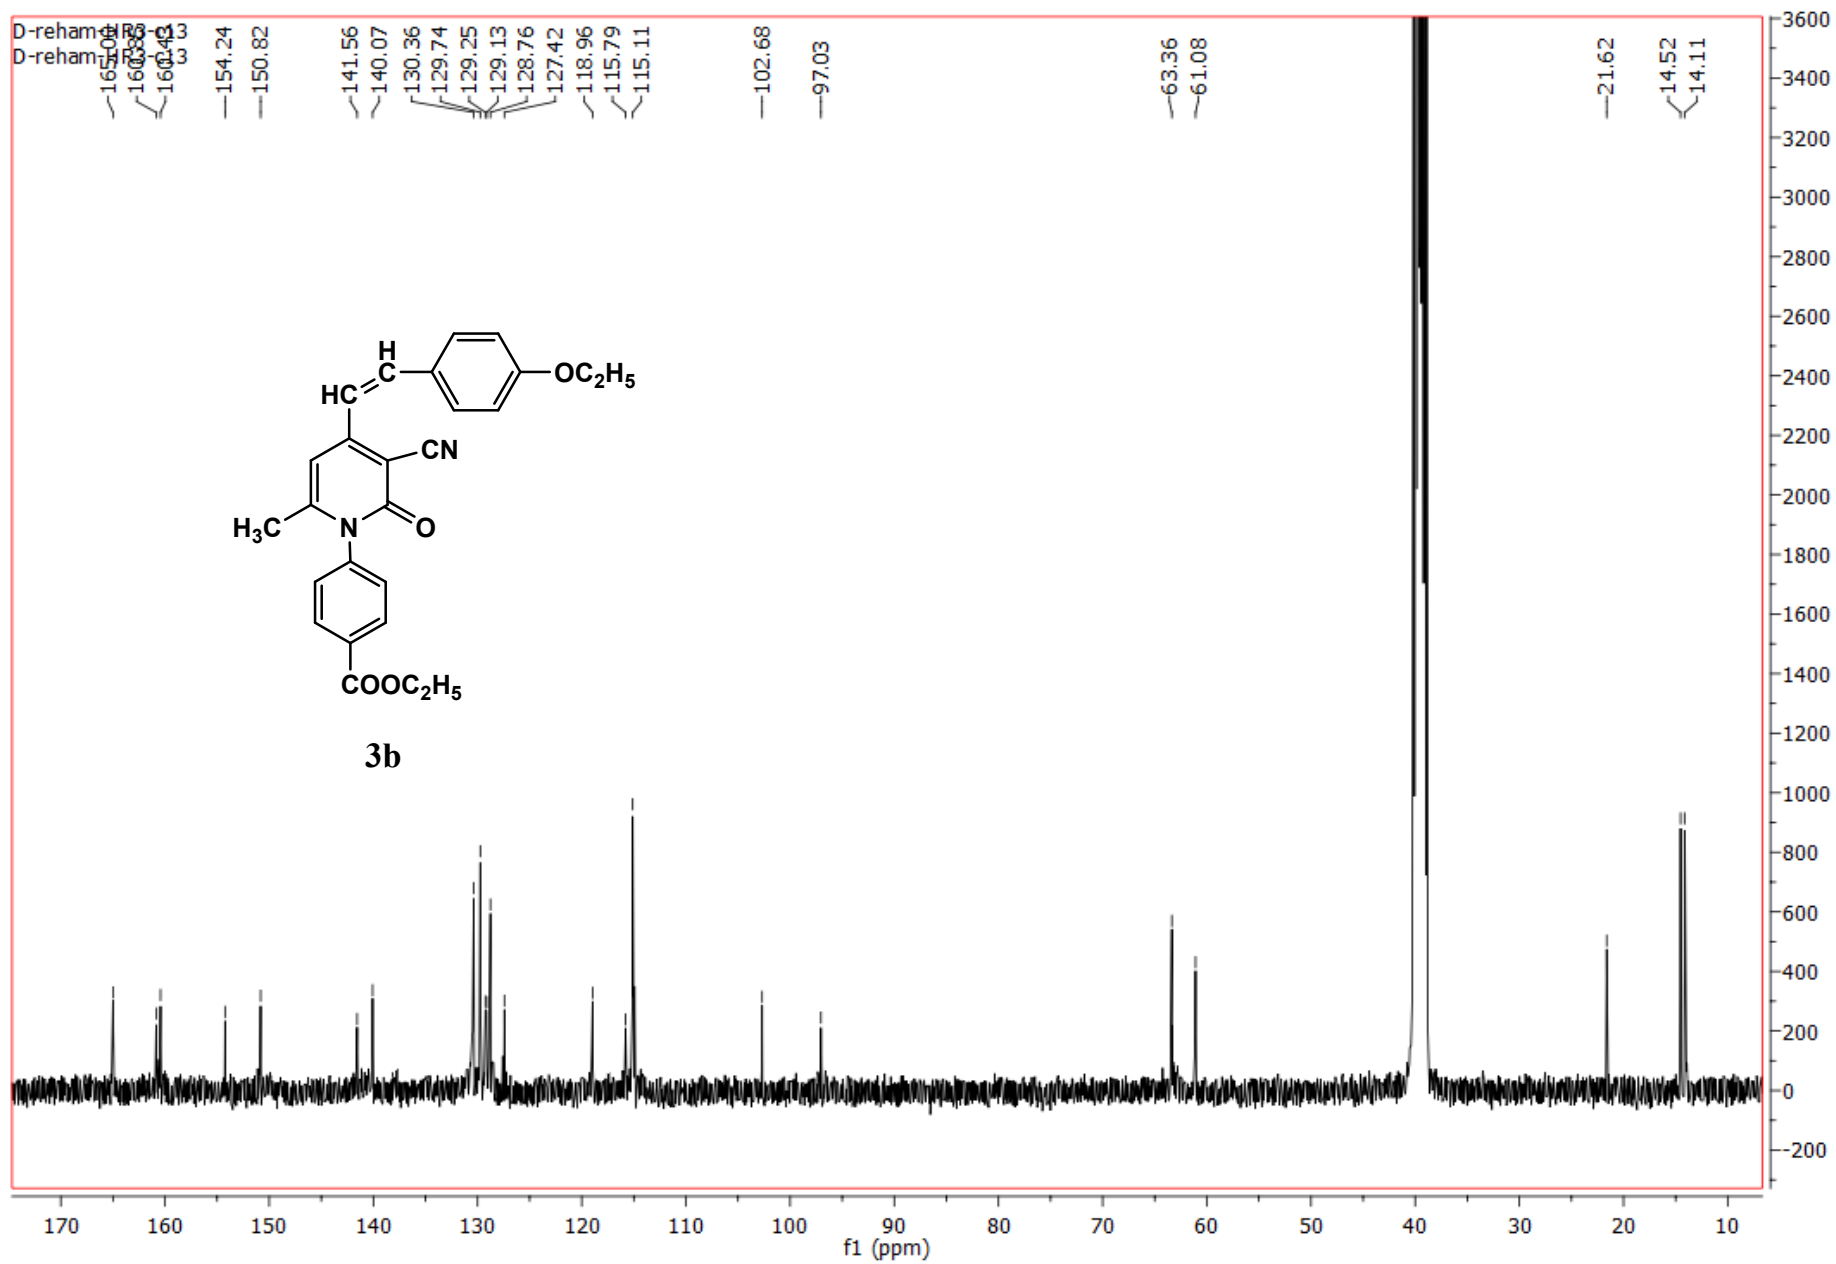

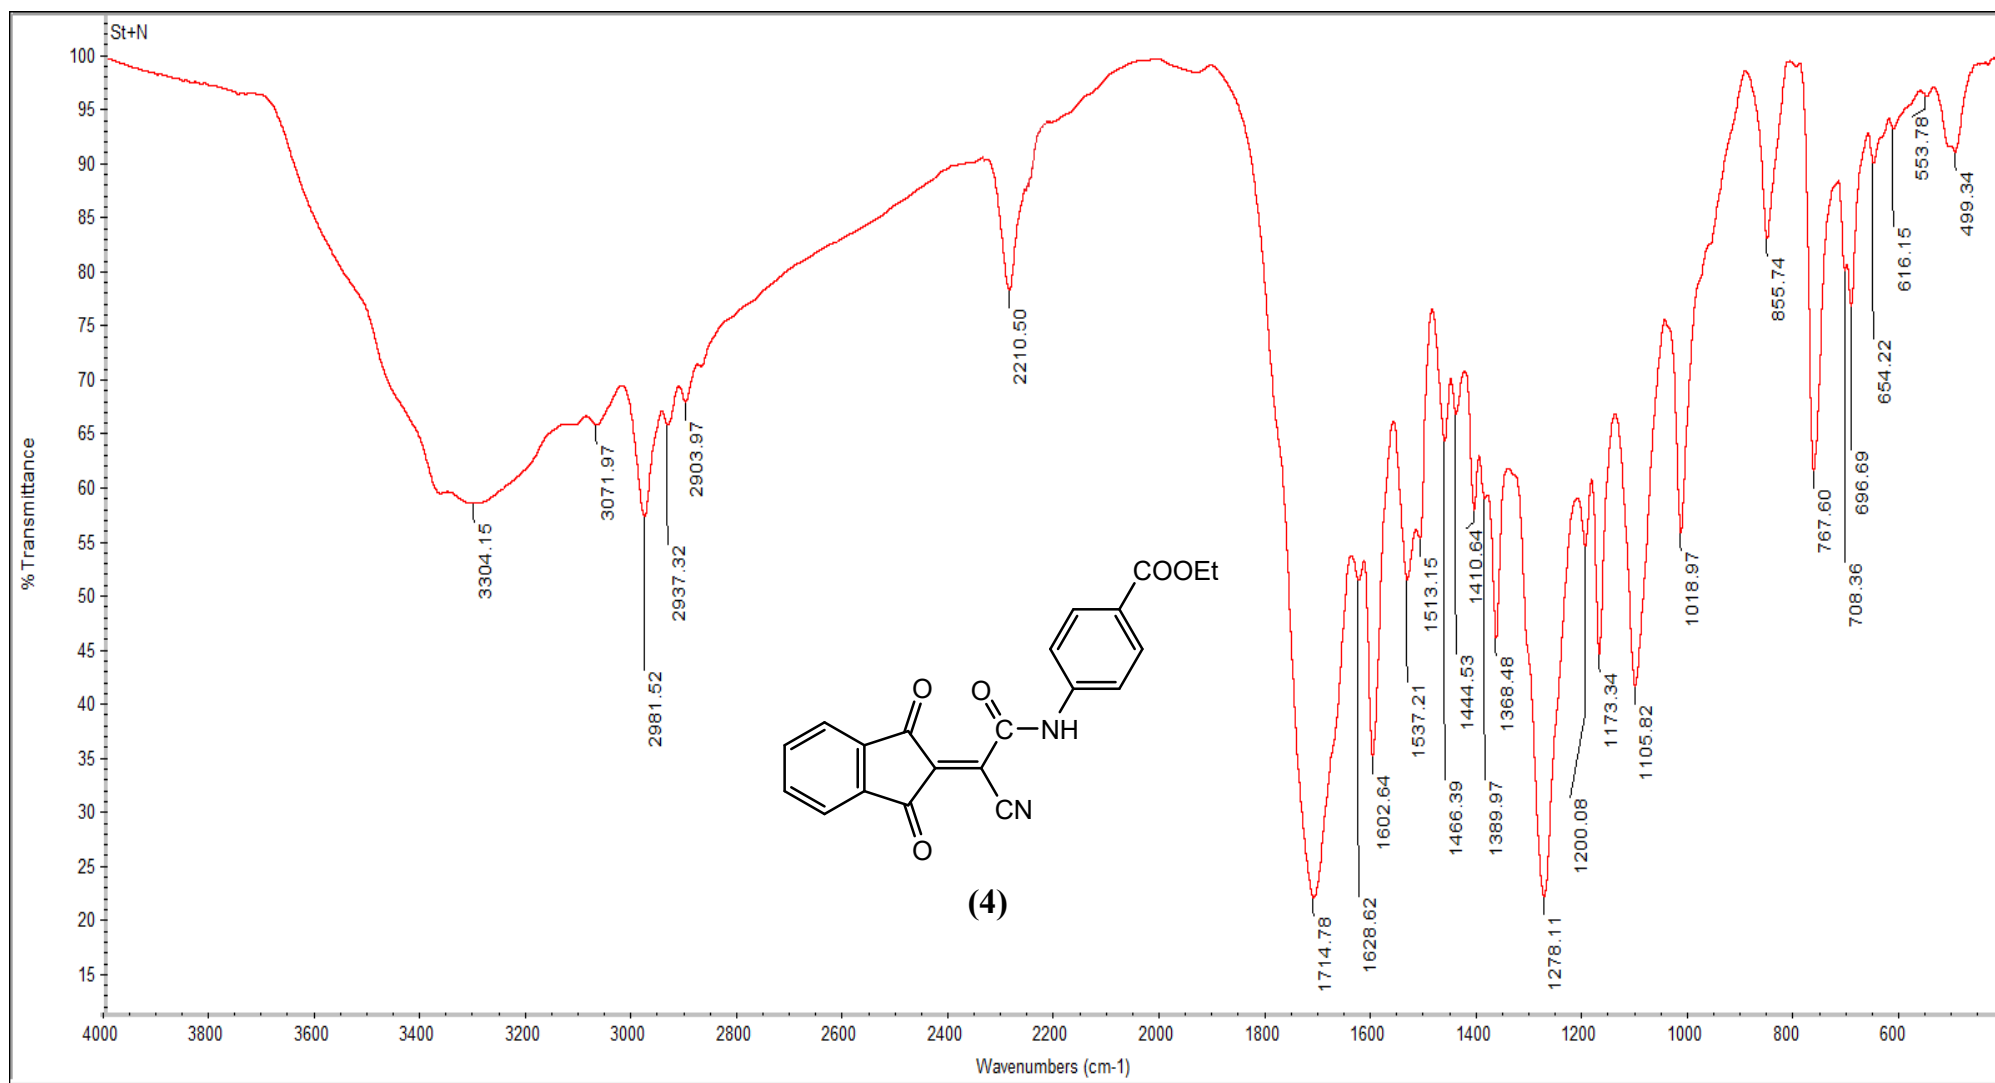

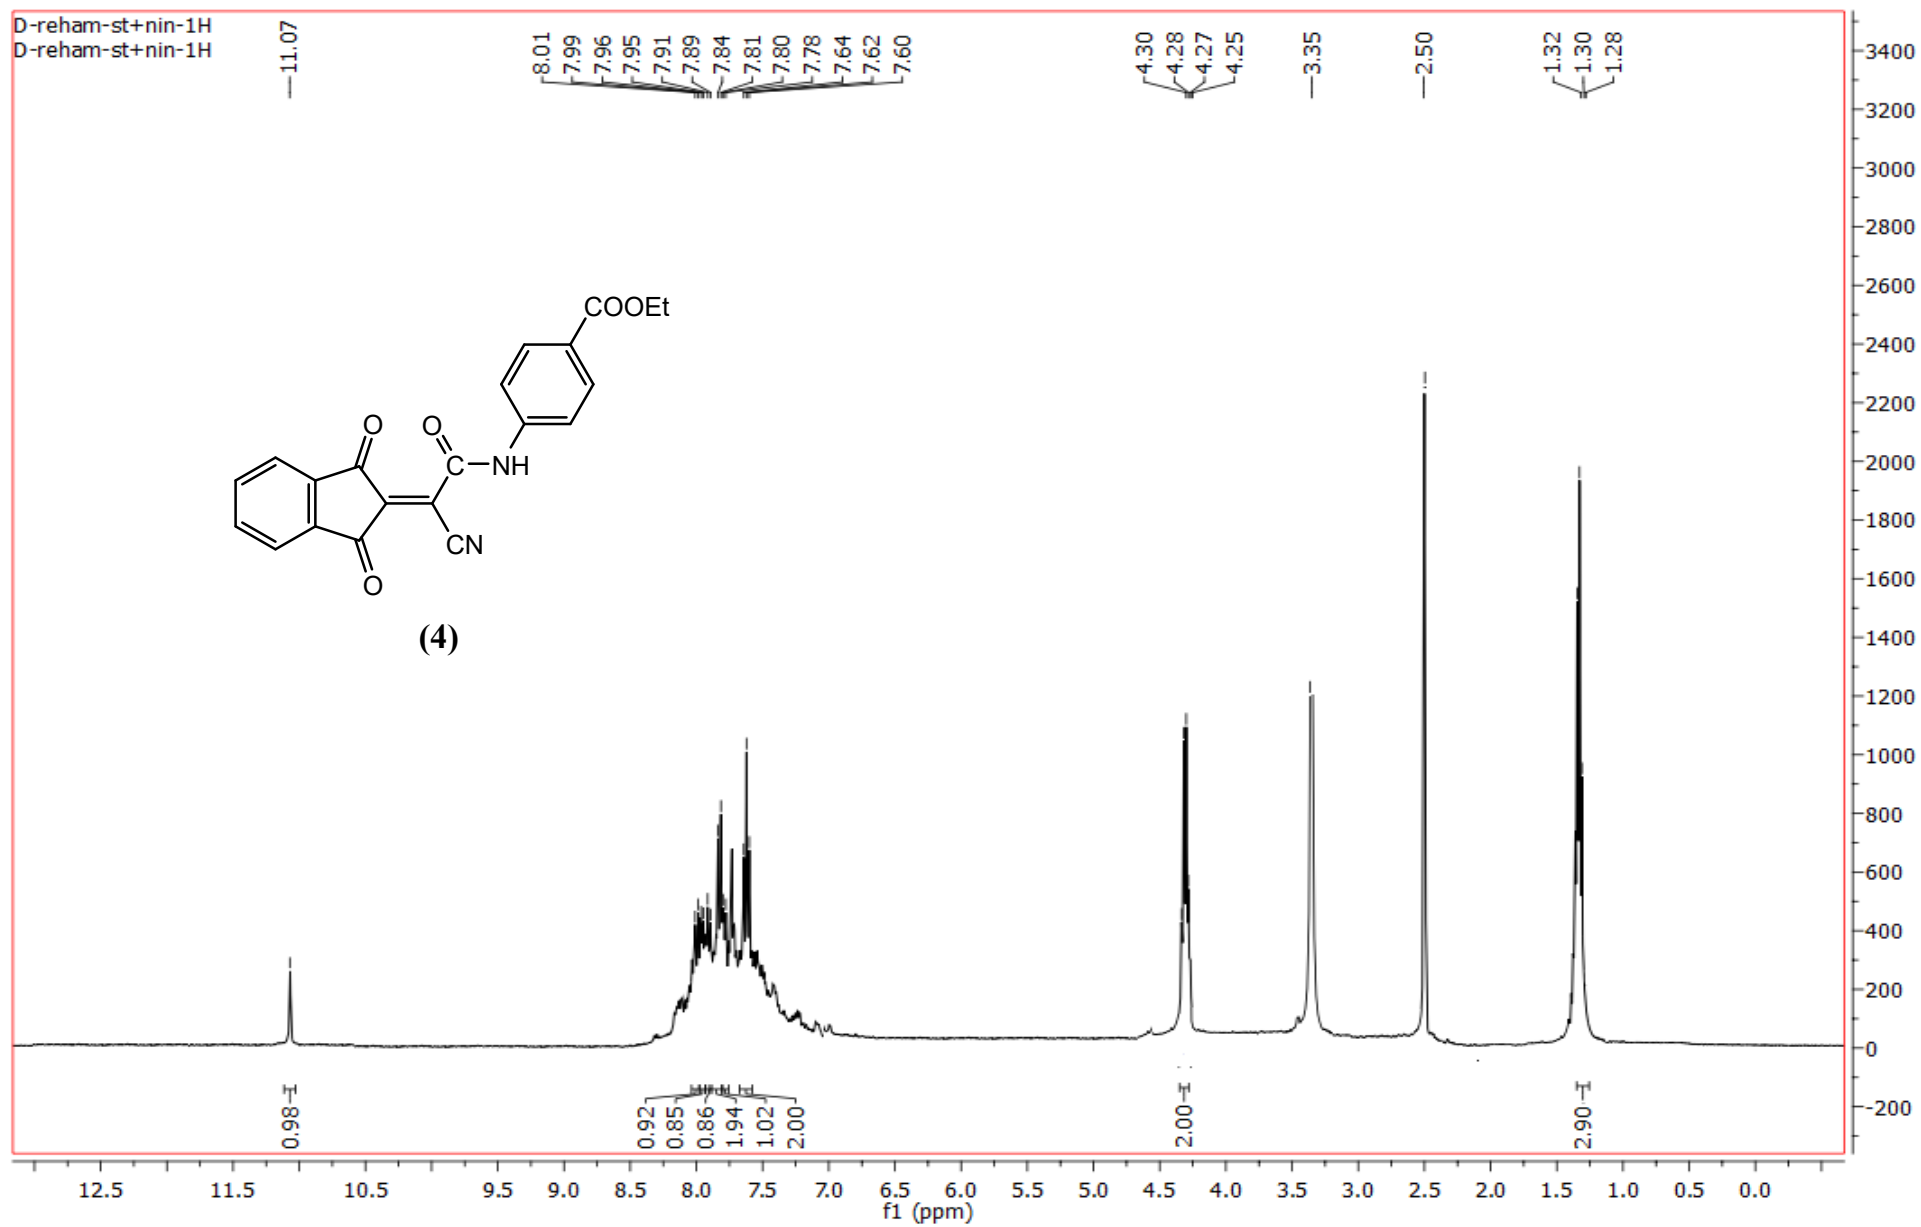

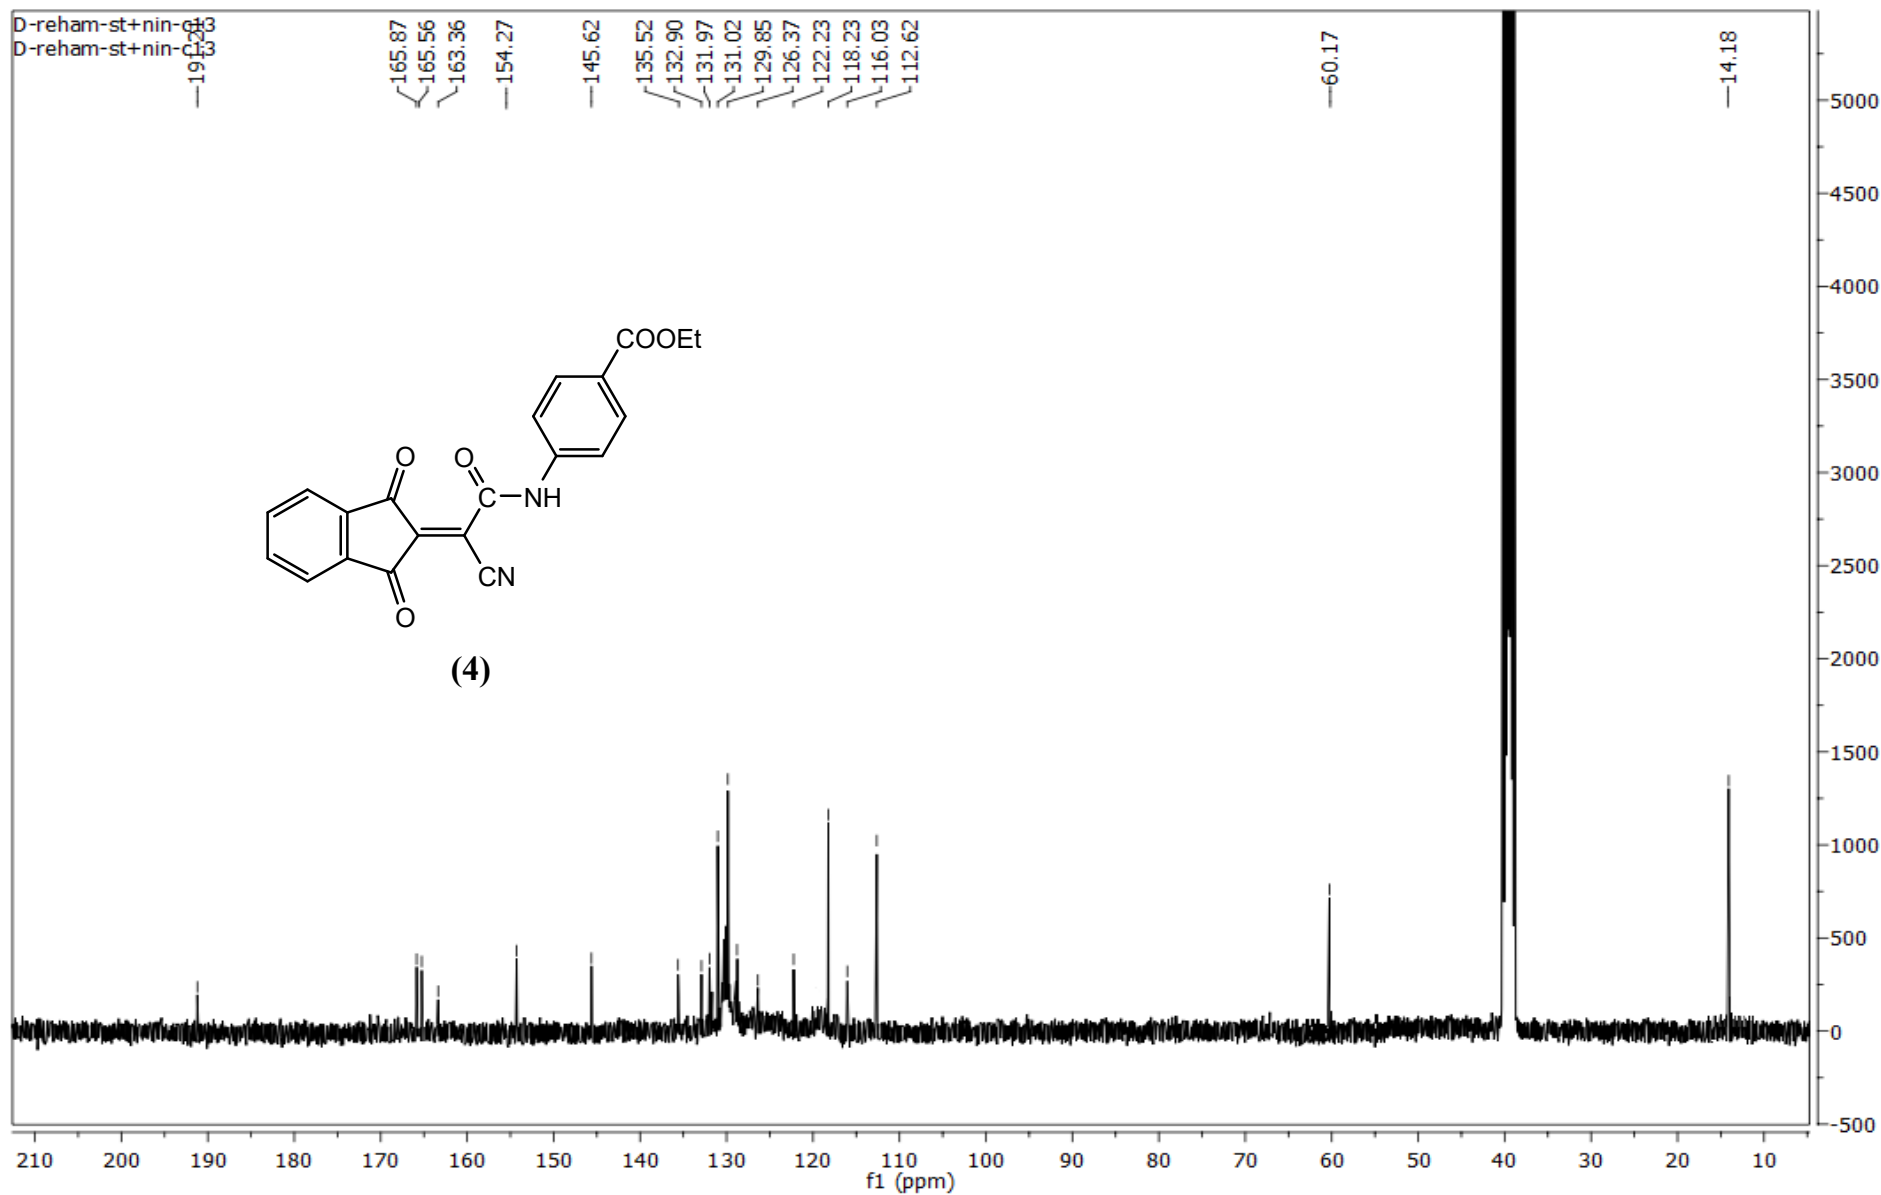

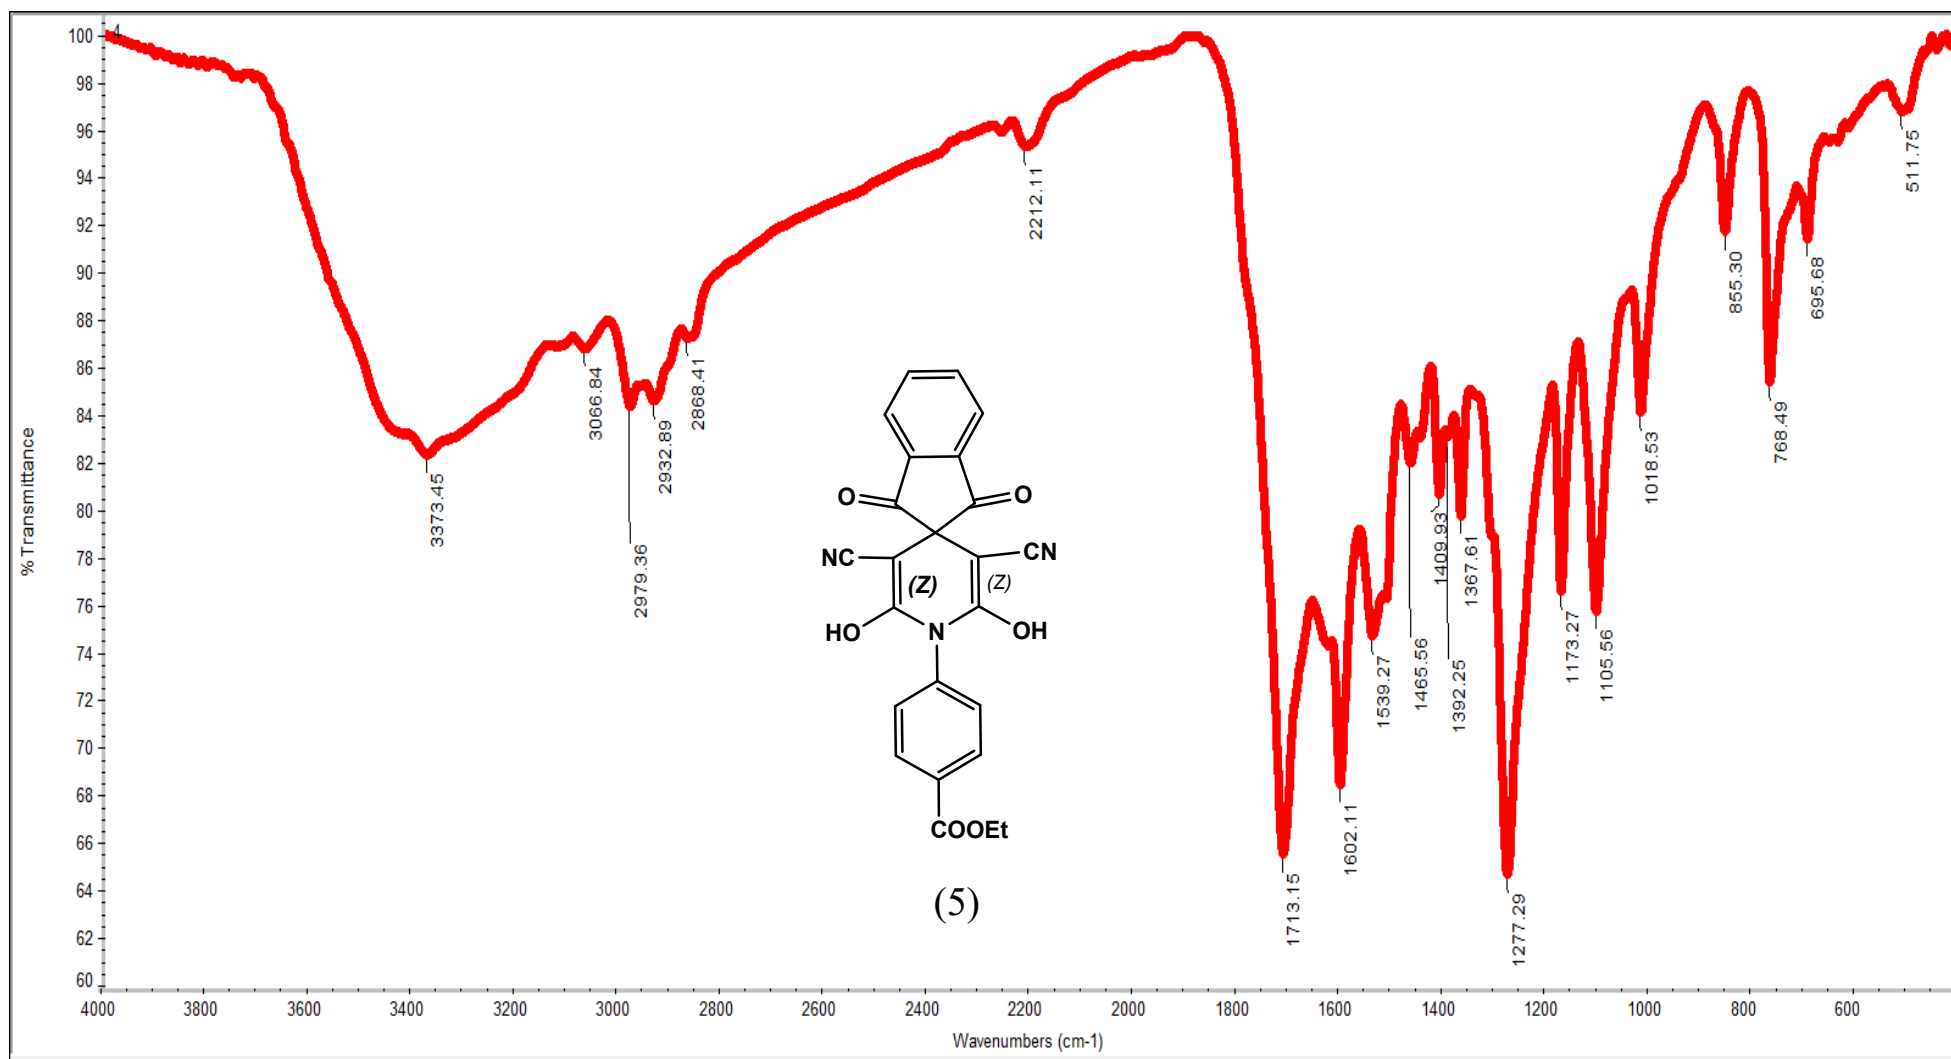

D-reham-4-1H  
D-reham-4-1H

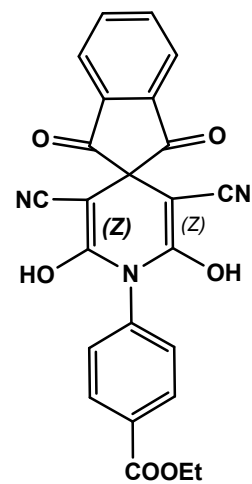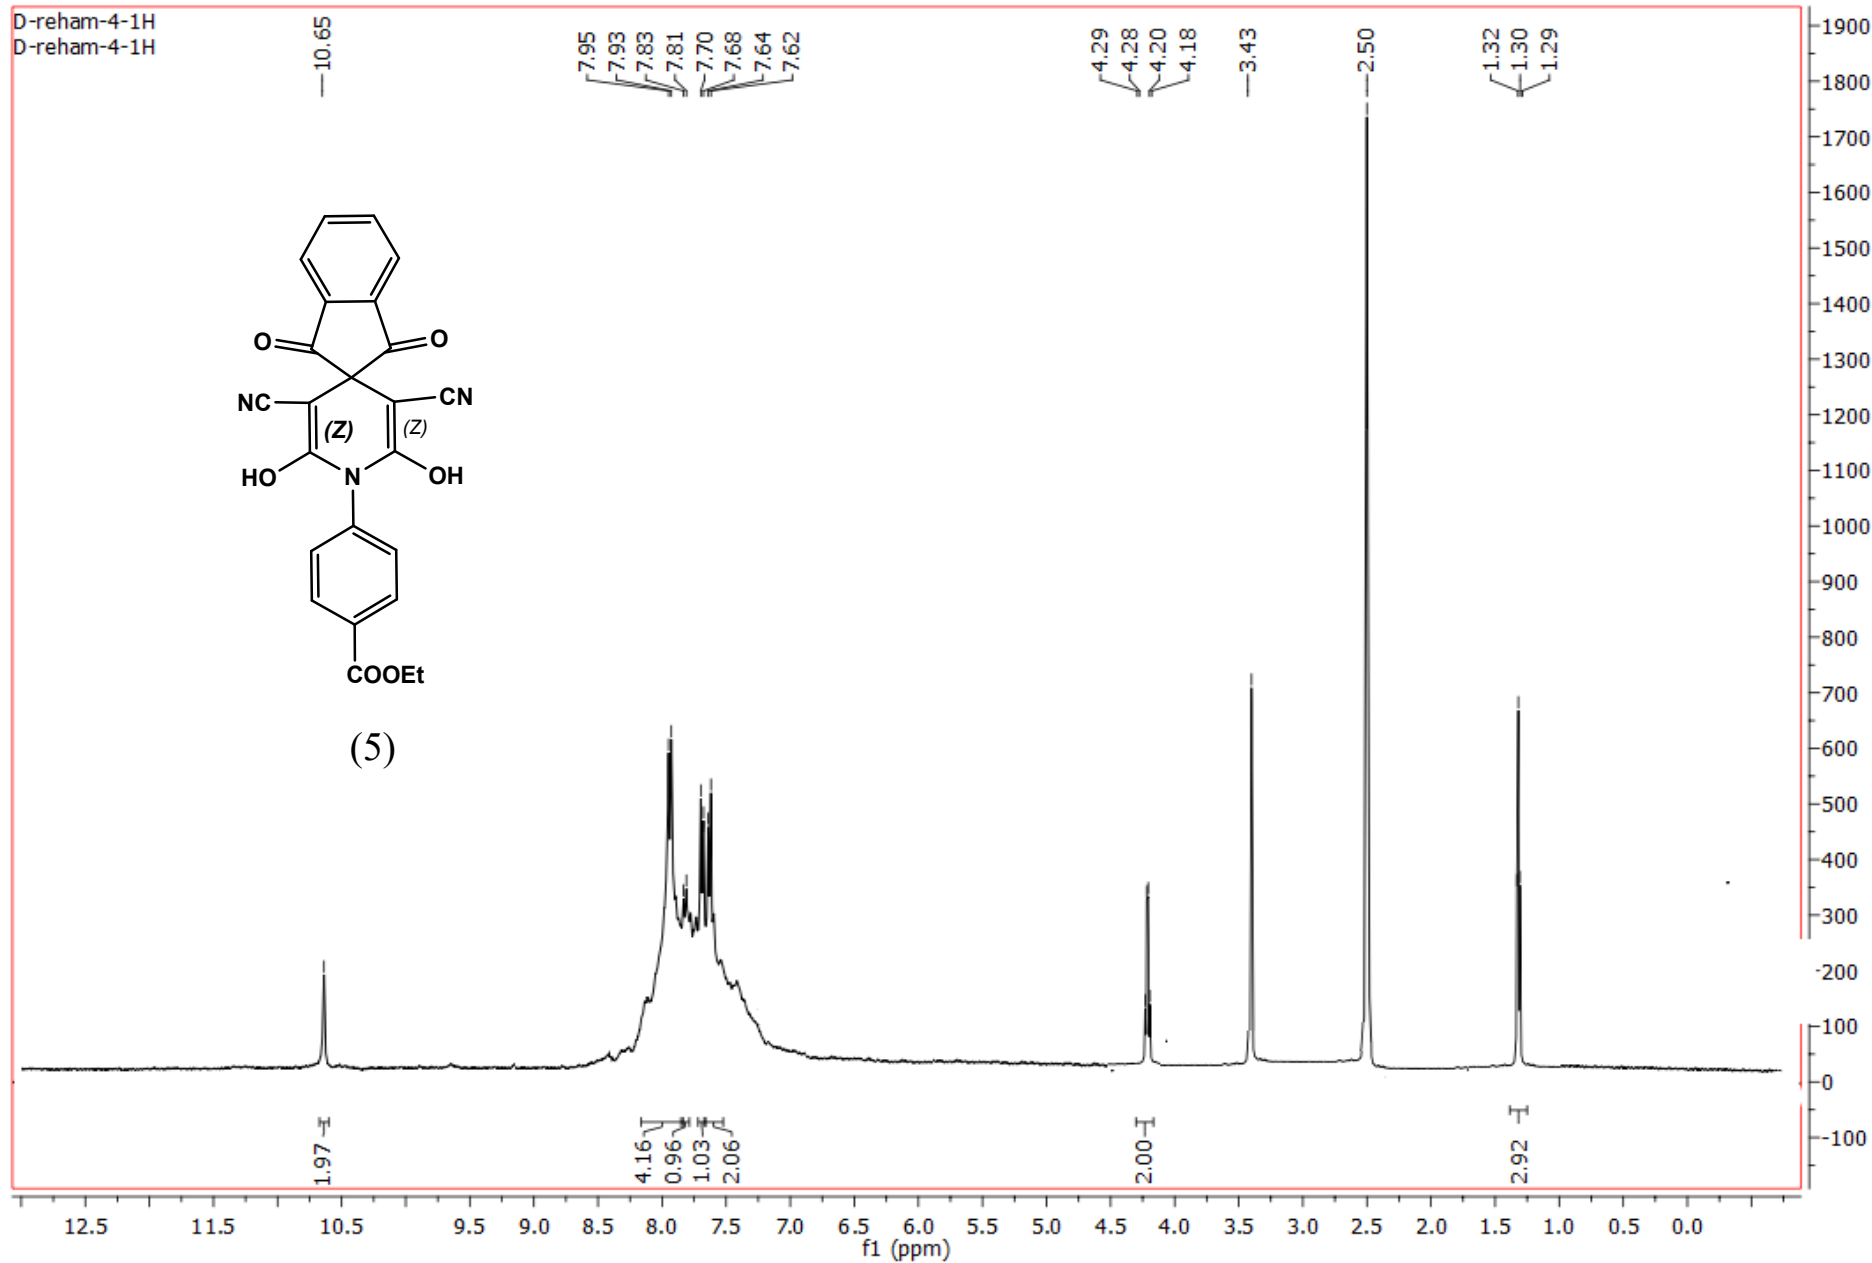

D-reham--4-cl3  
D-reham--4-cl3

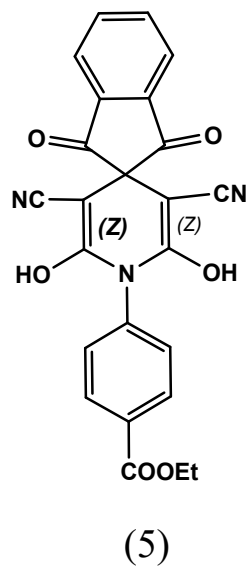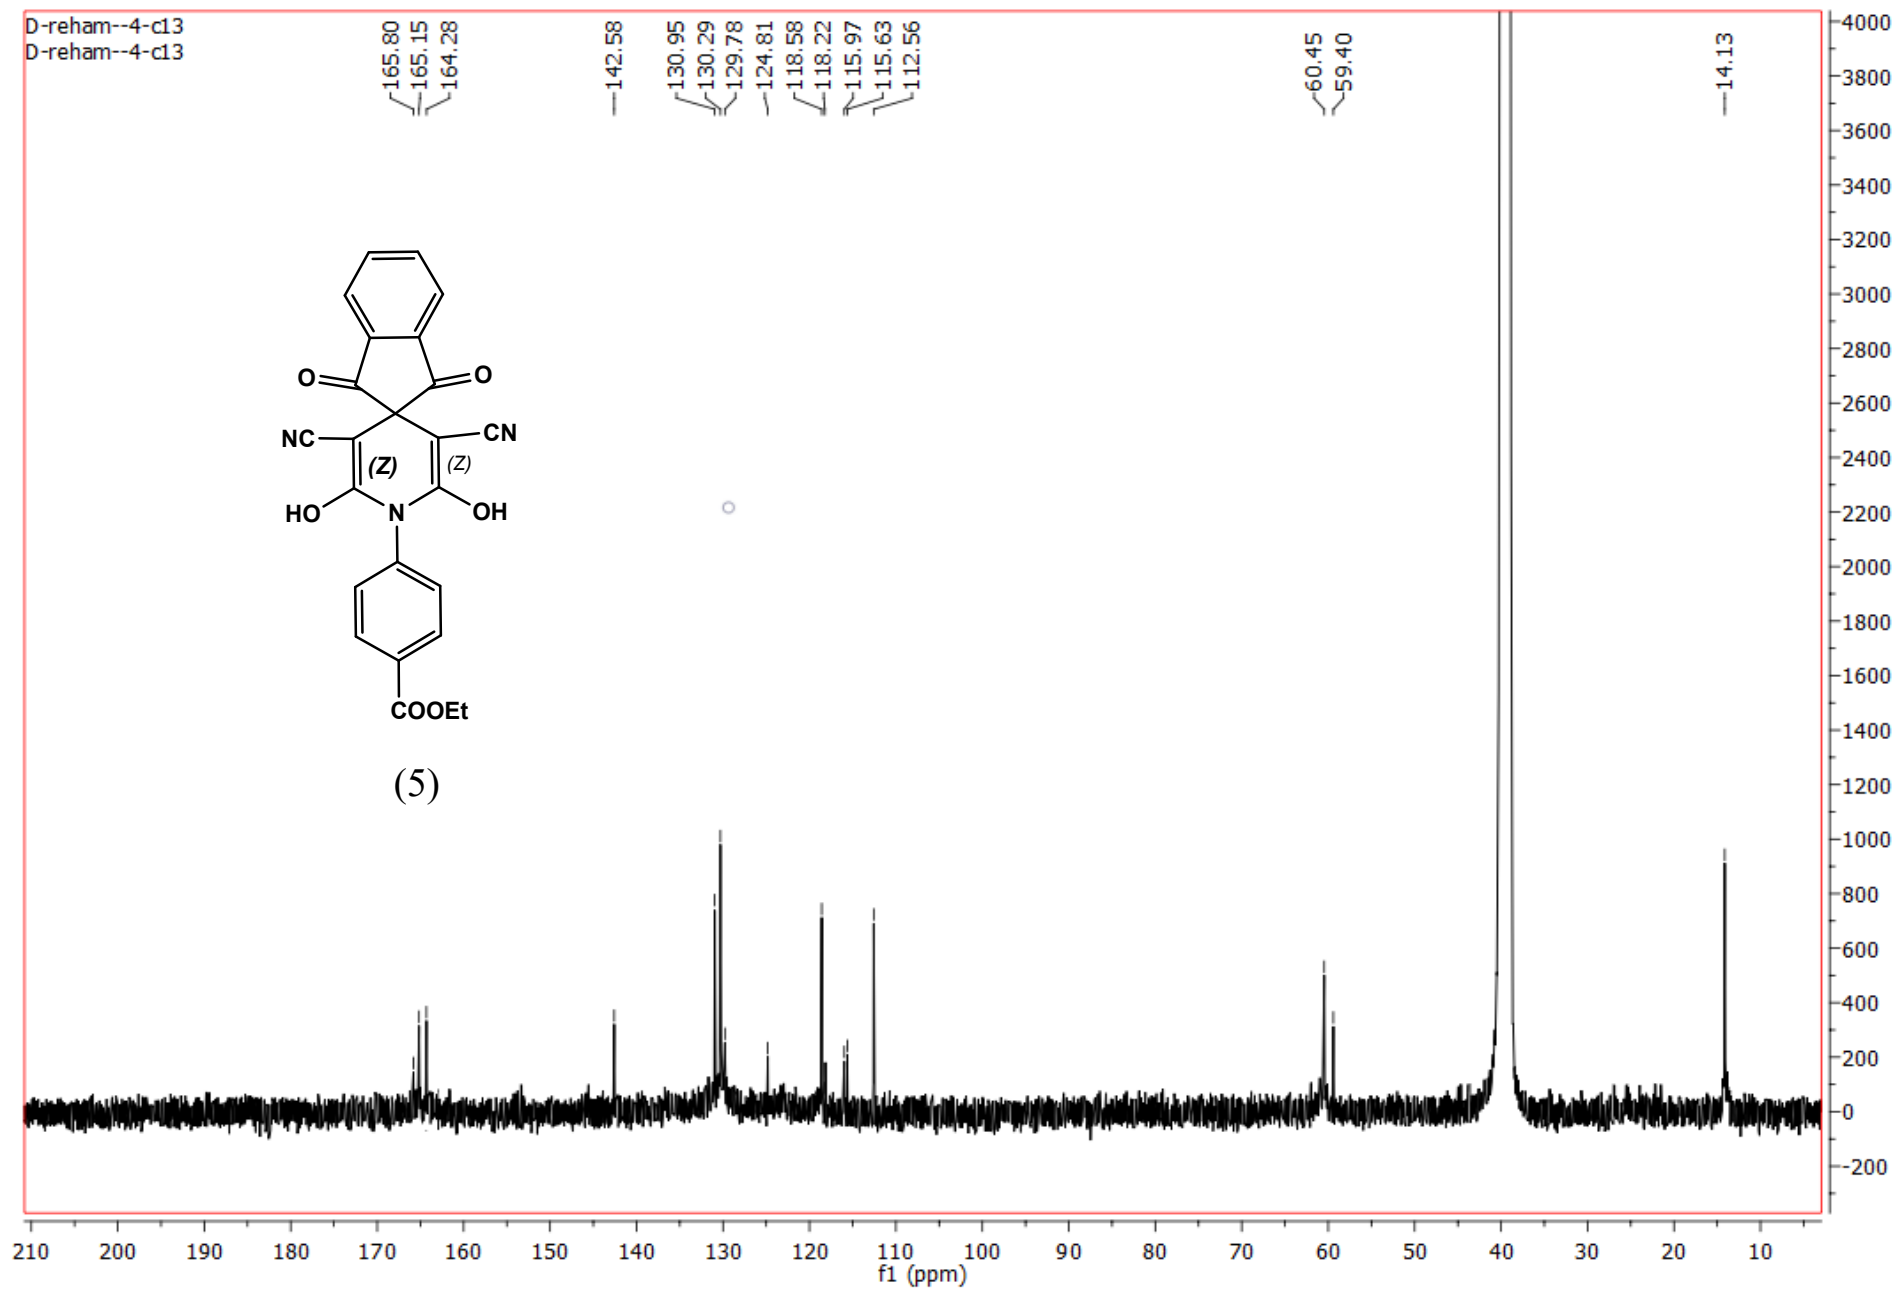



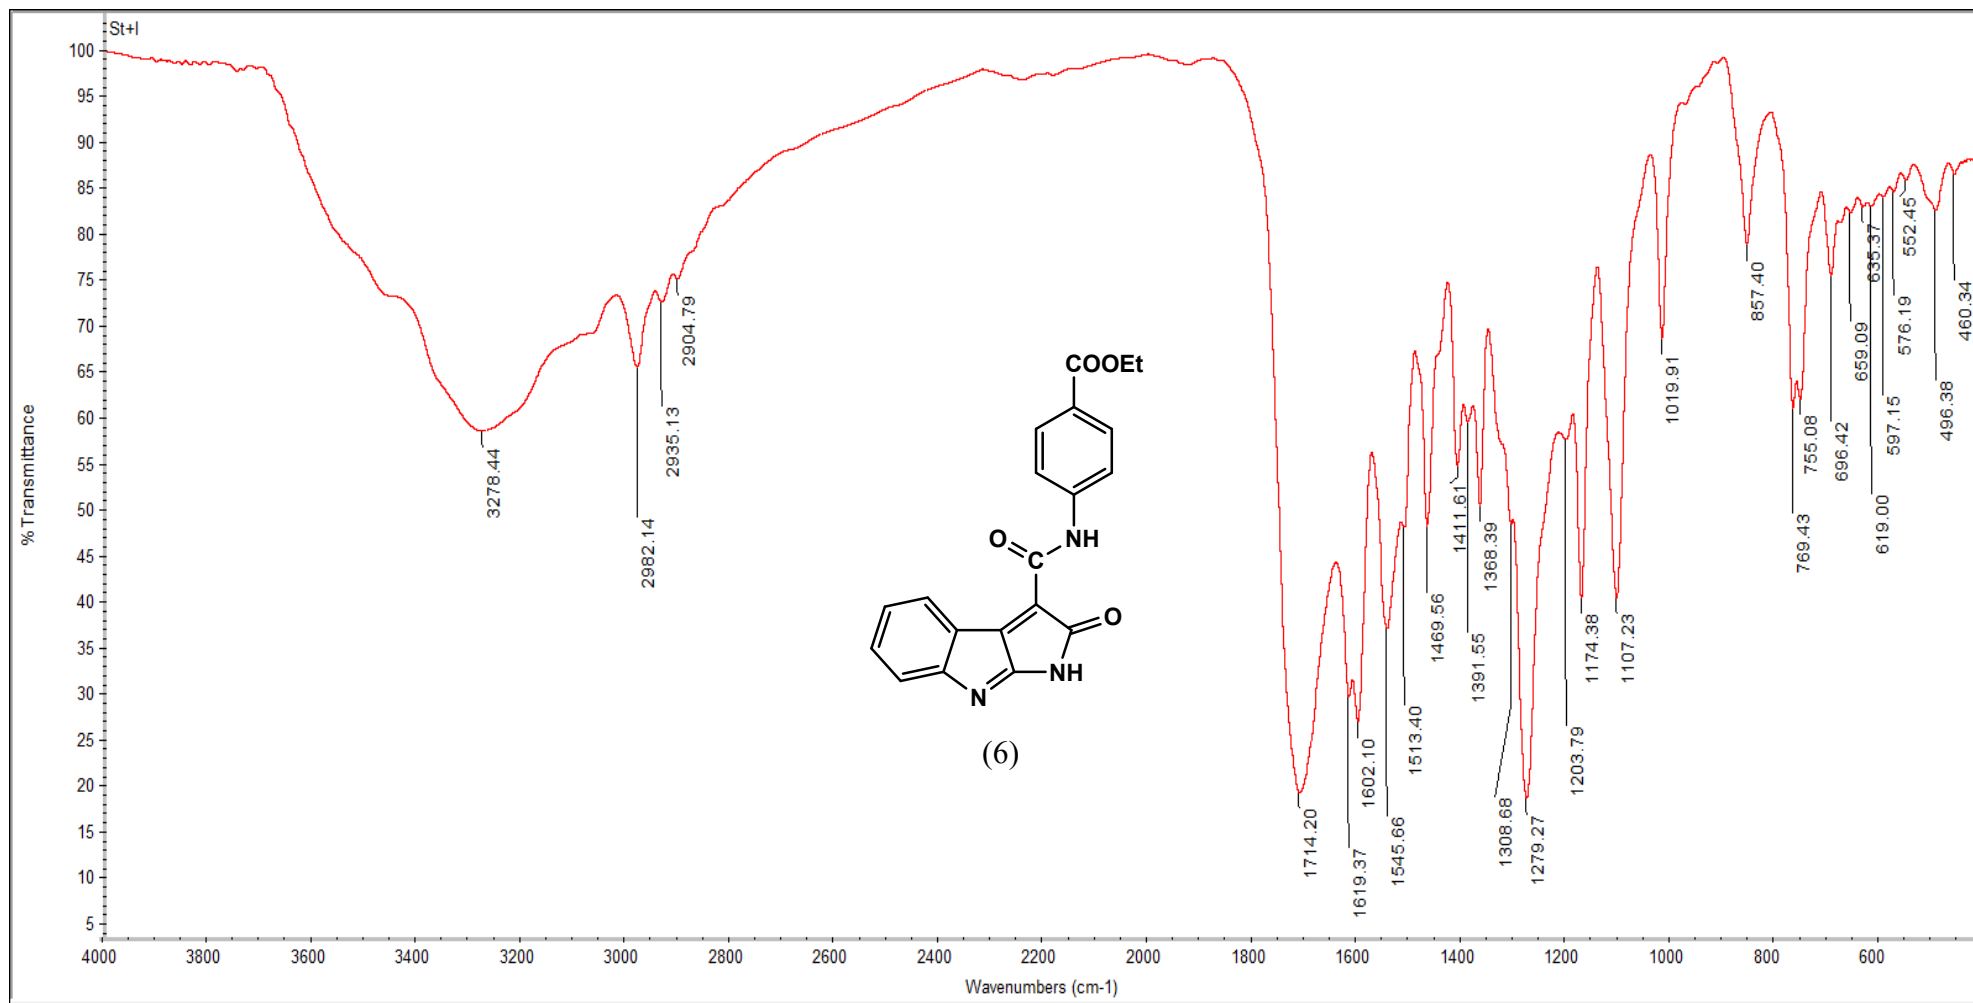

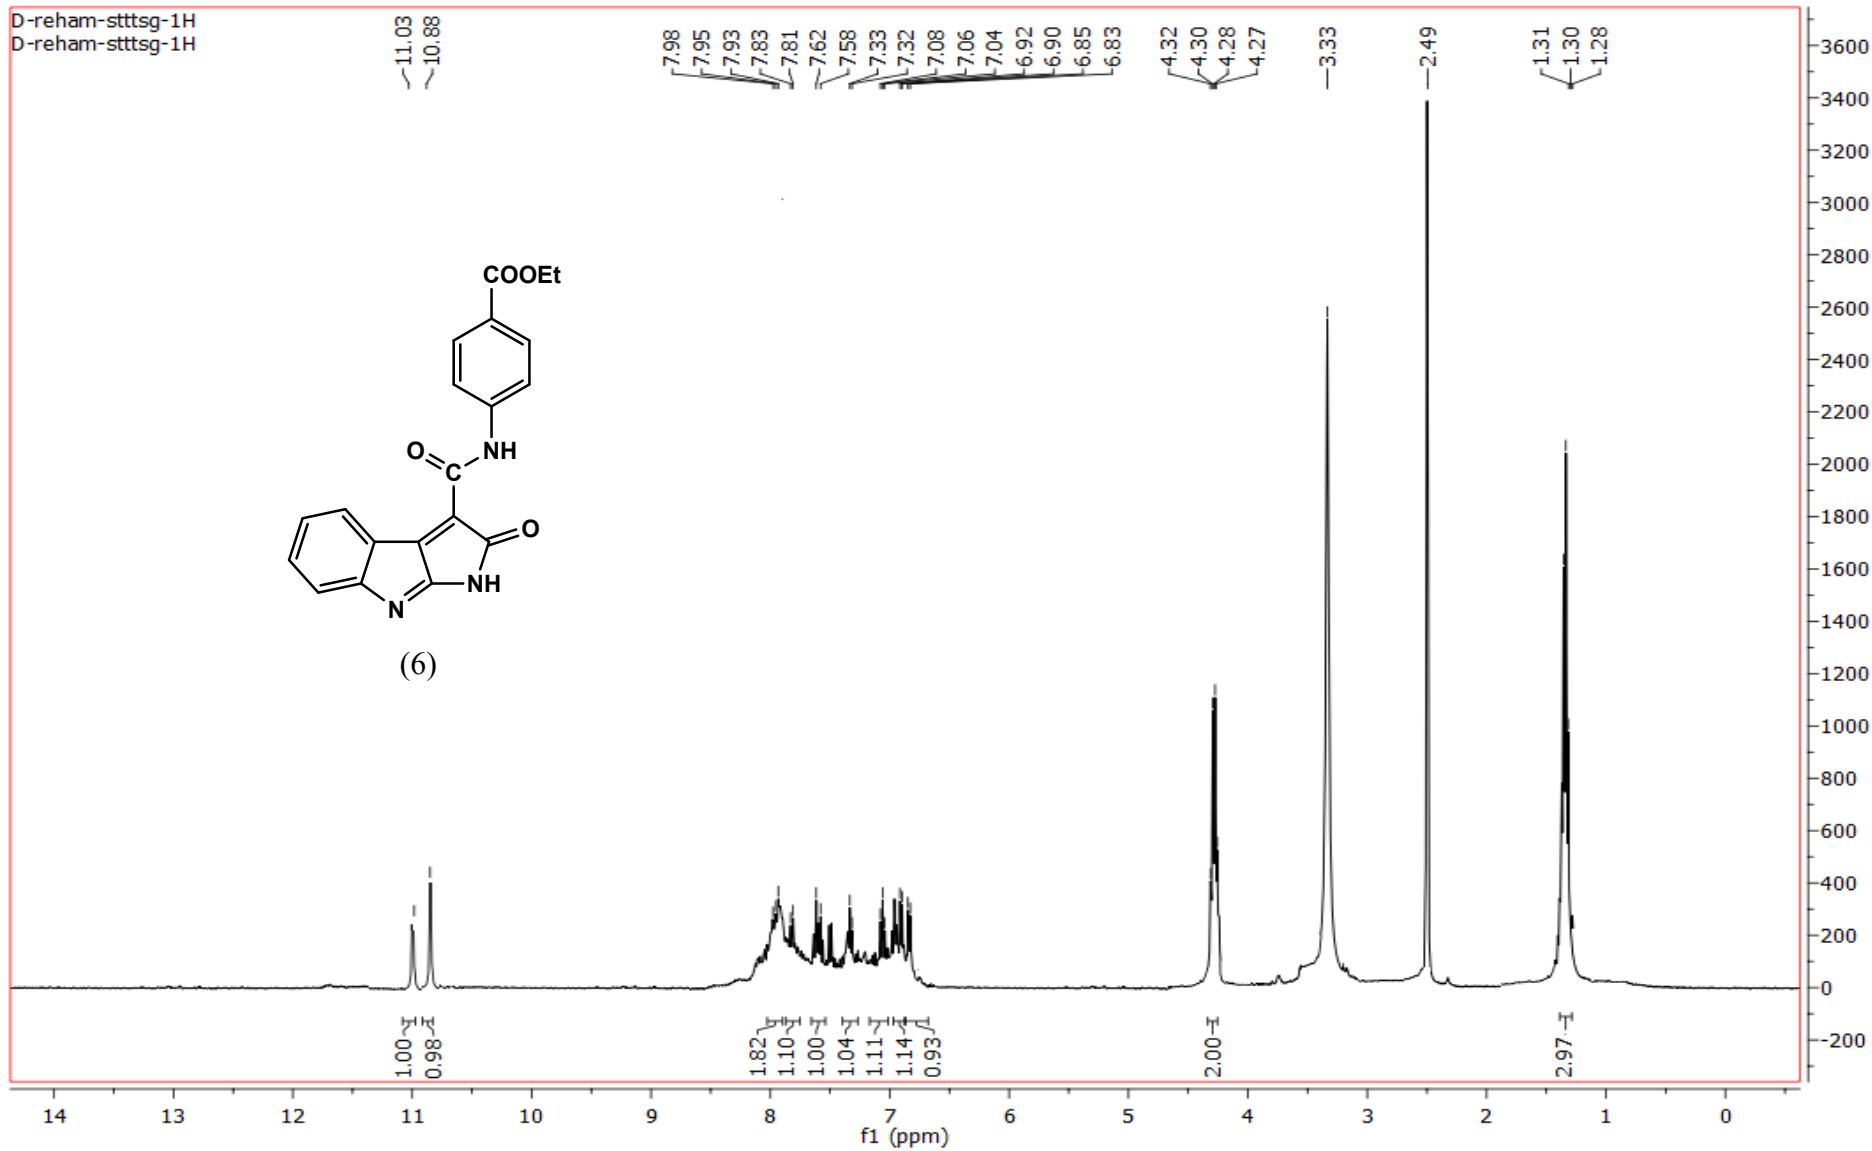

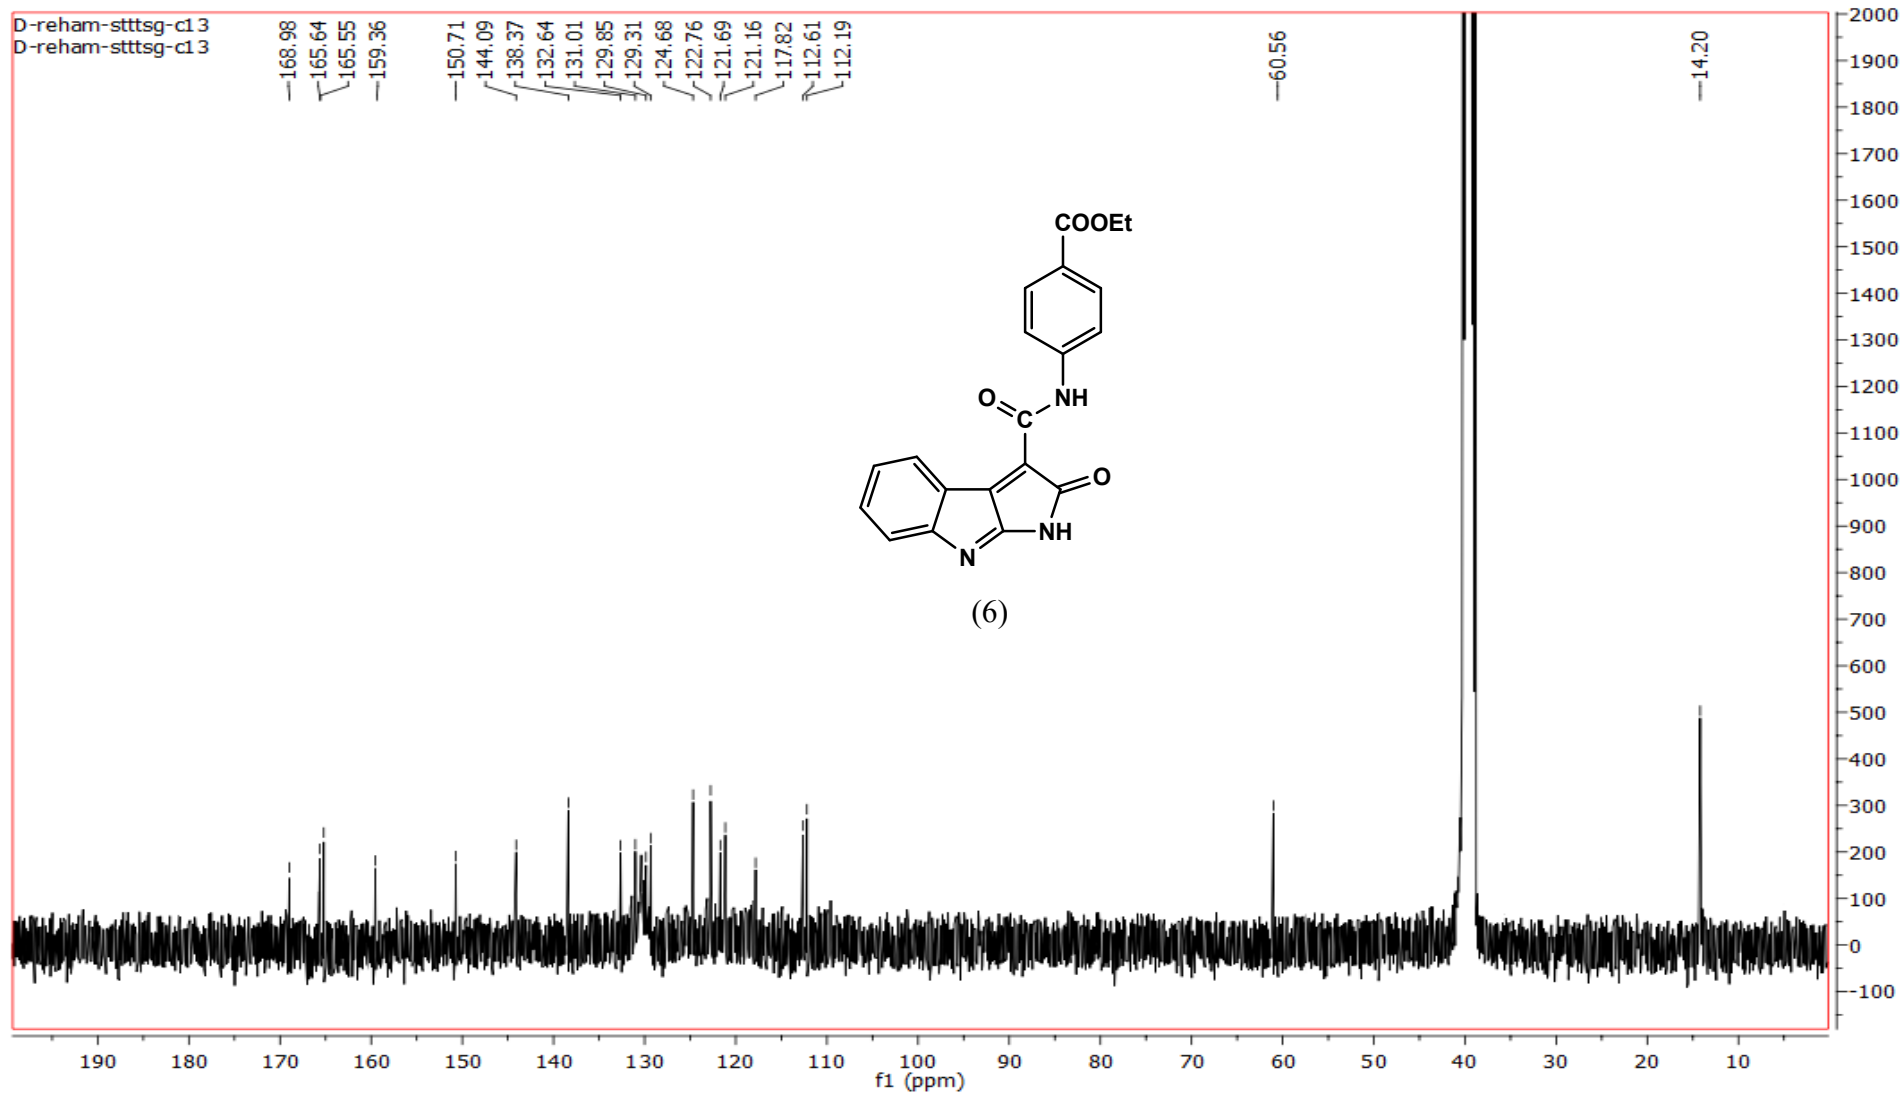

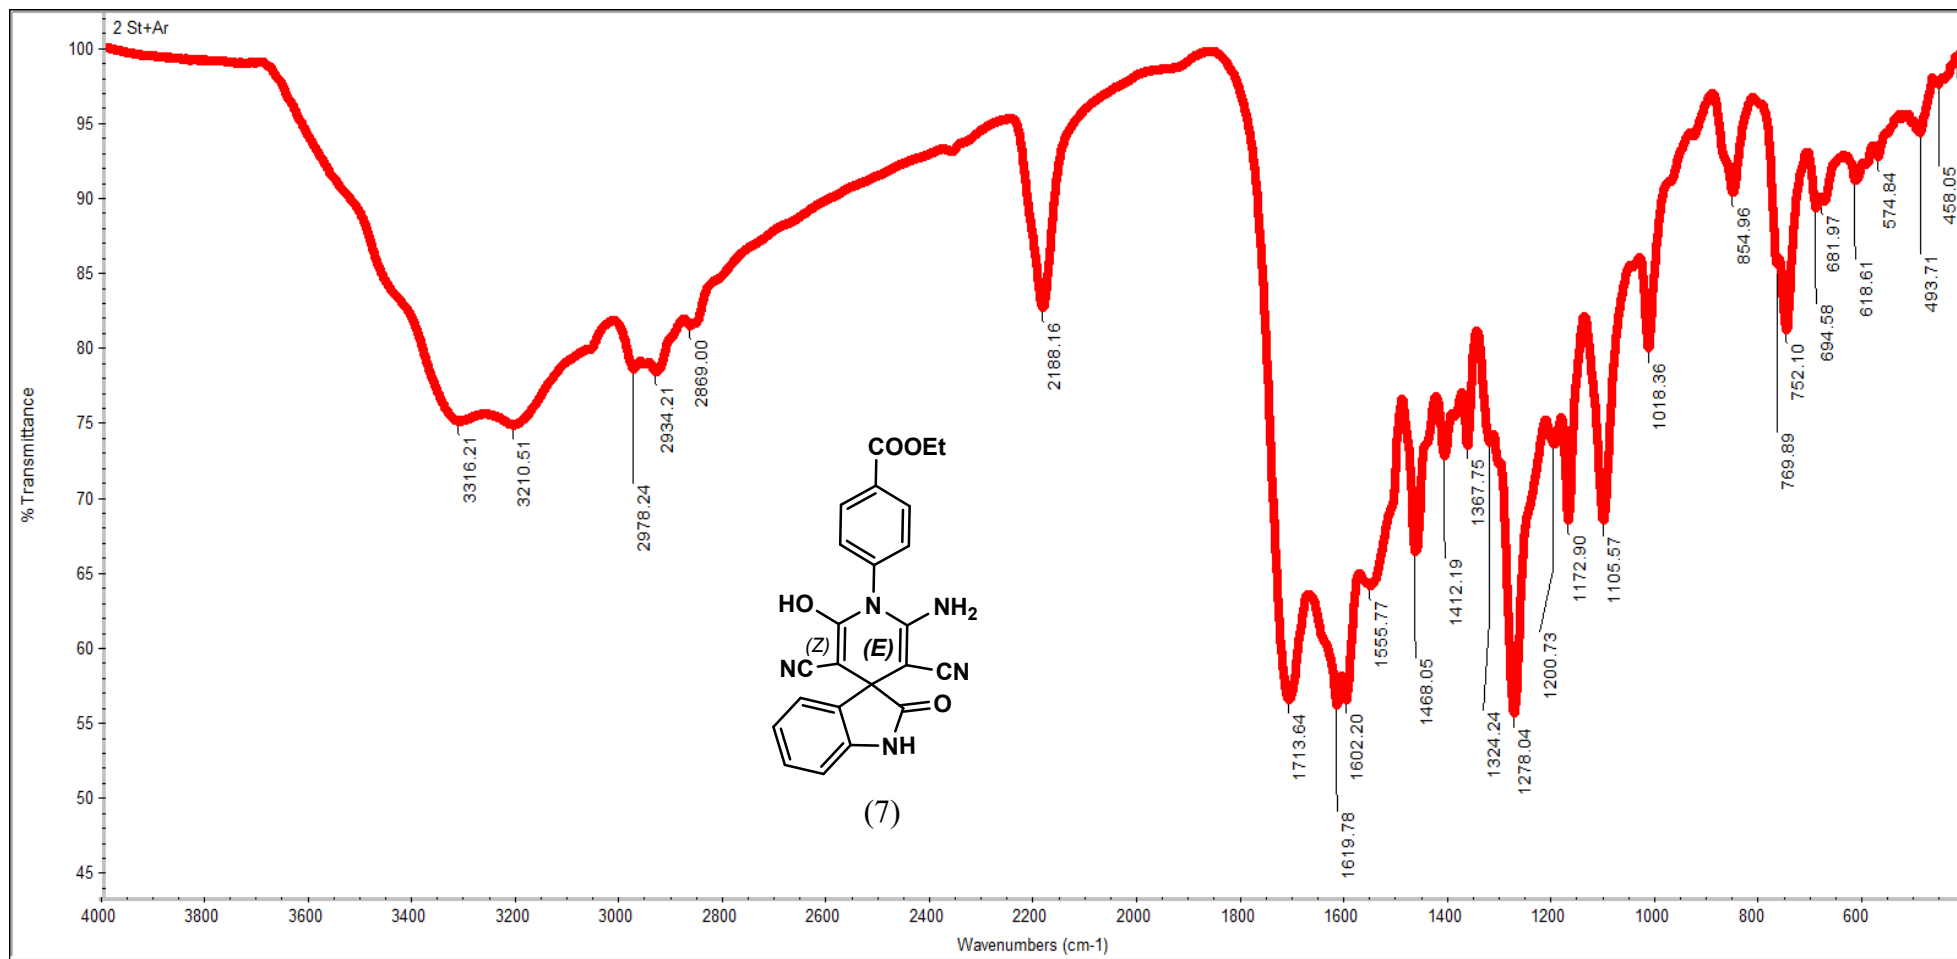

Dr\_Eman\_Fayed\_2\_PROTON\_01  
Dr\_Eman\_Fayed\_2

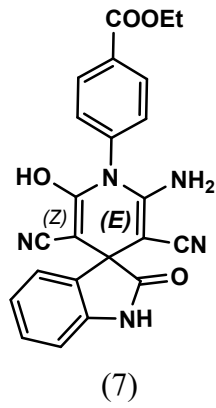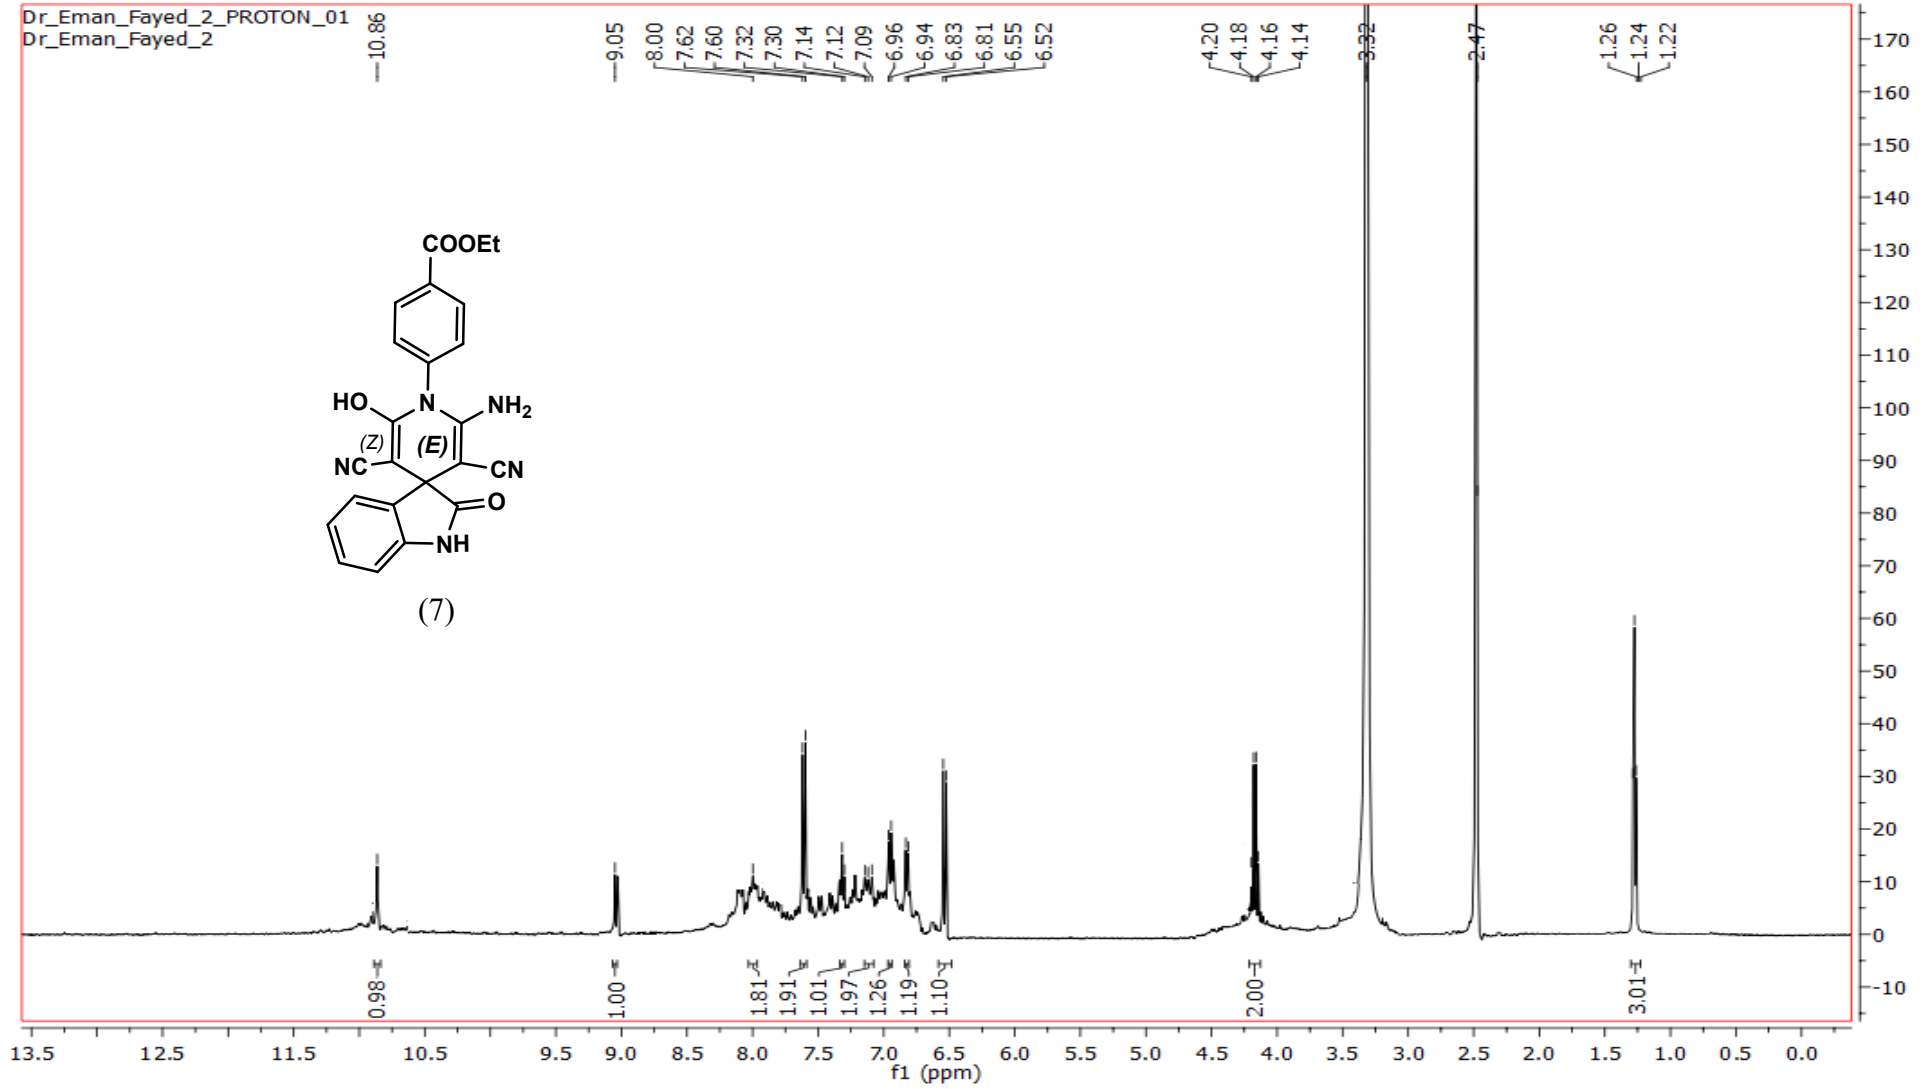

D-reham-2-c13  
D-reham-2-c13

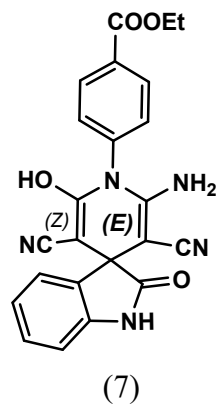

169.47  
166.35  
165.62  
153.90  
144.57  
133.82  
133.11  
131.49  
129.79  
125.49  
122.18  
121.63  
118.71  
116.51  
115.77  
113.10  
110.02  
103.68

59.94

49.07

14.65

3500  
3000  
2500  
2000  
1500  
1000  
500  
0

210 200 190 180 170 160 150 140 130 120 110 100 90 80 70 60 50 40 30 20 10 0 -10

f1 (ppm)

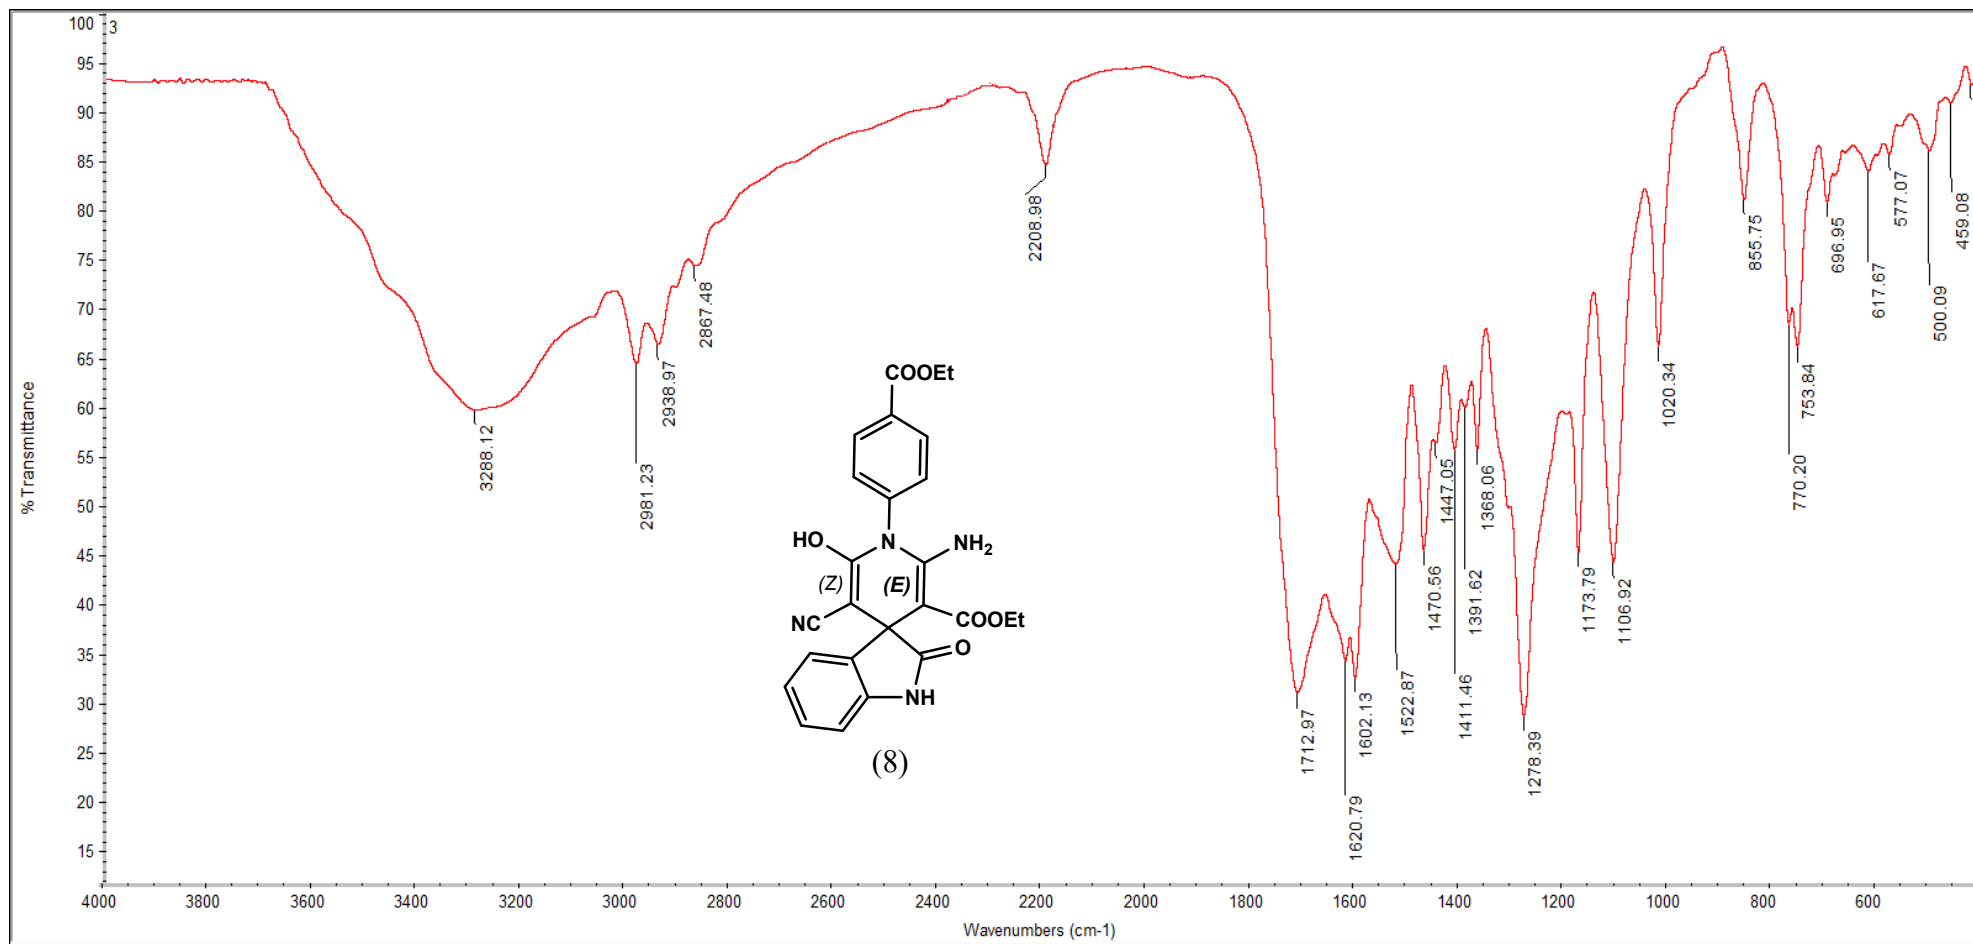

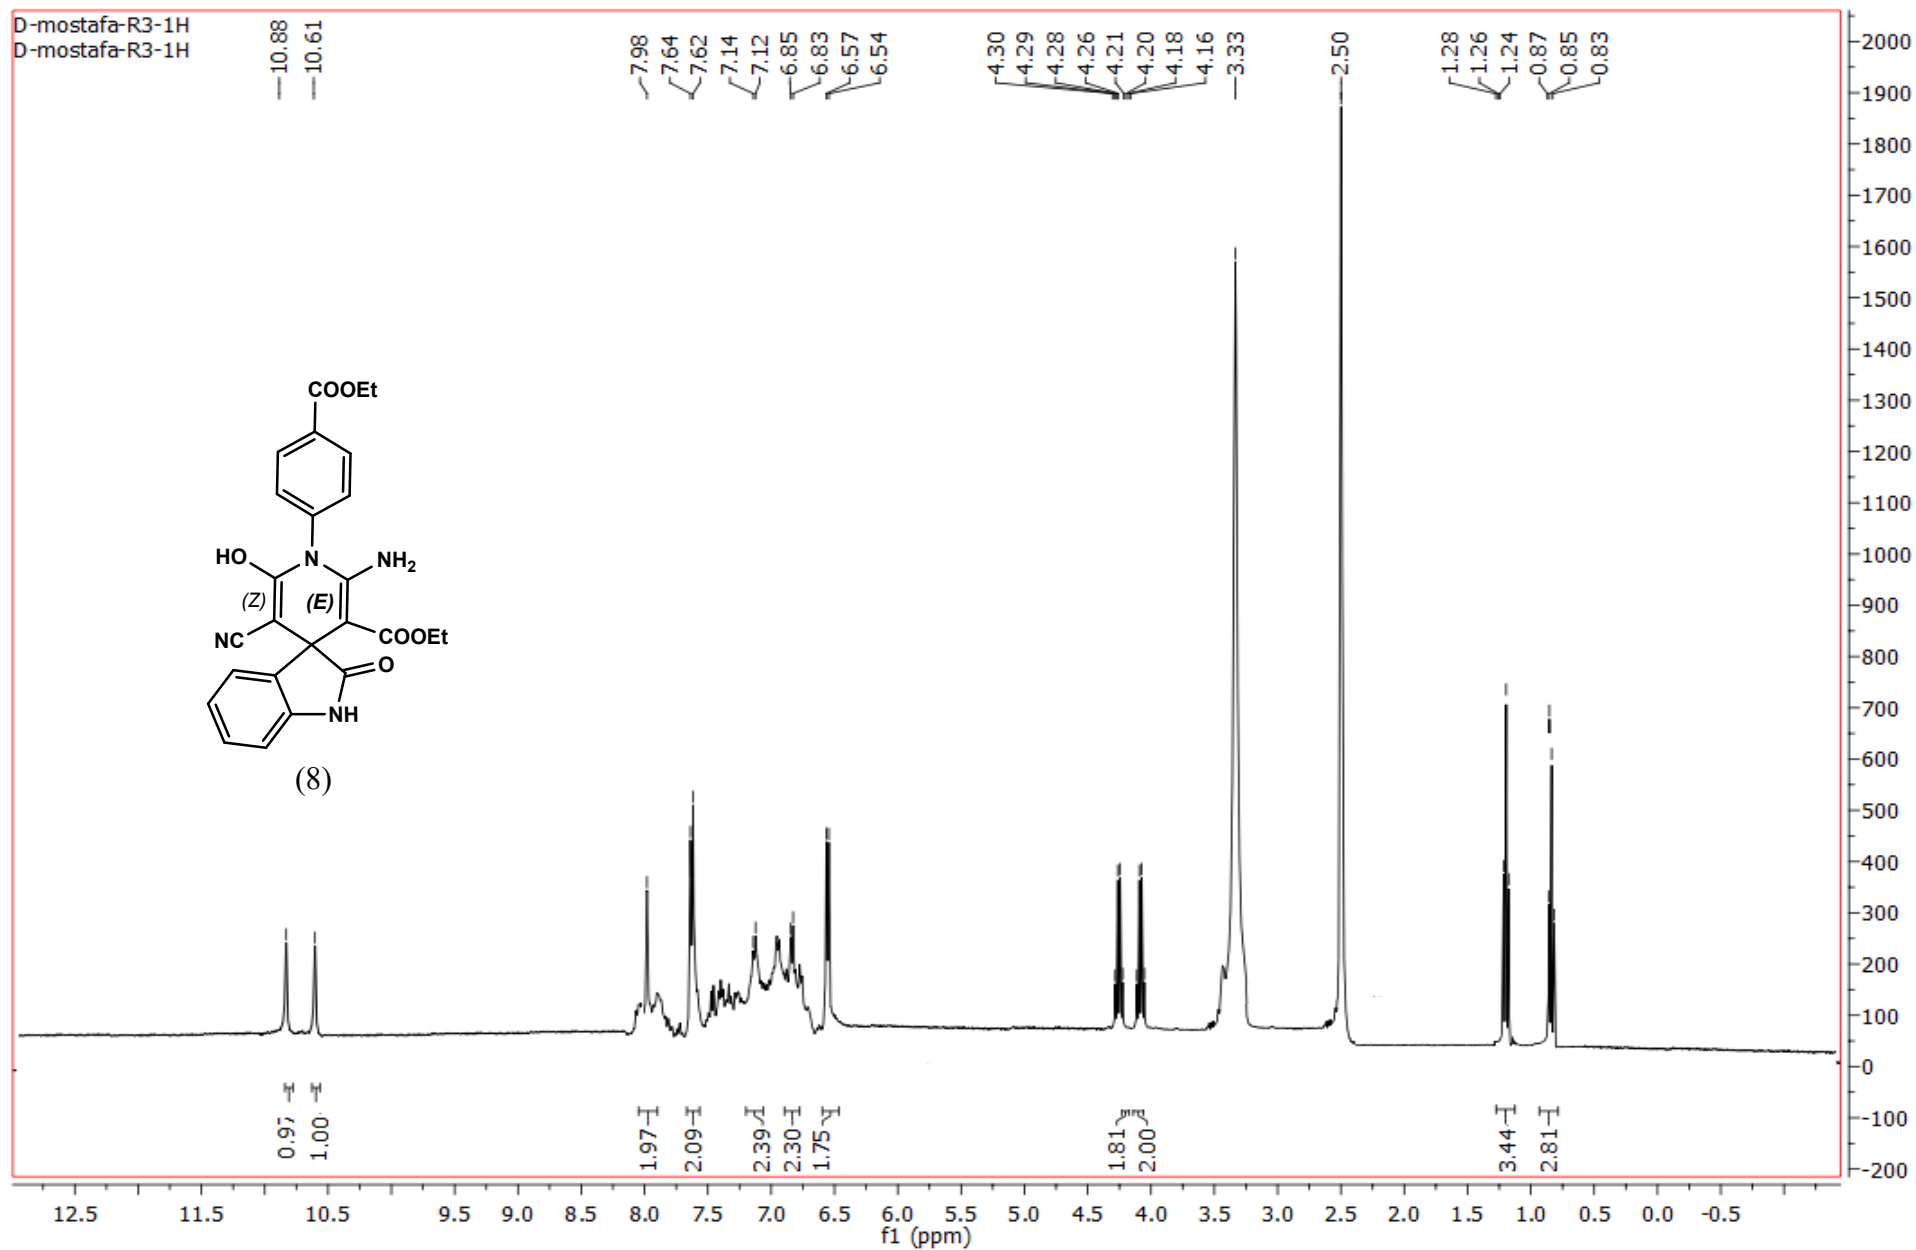



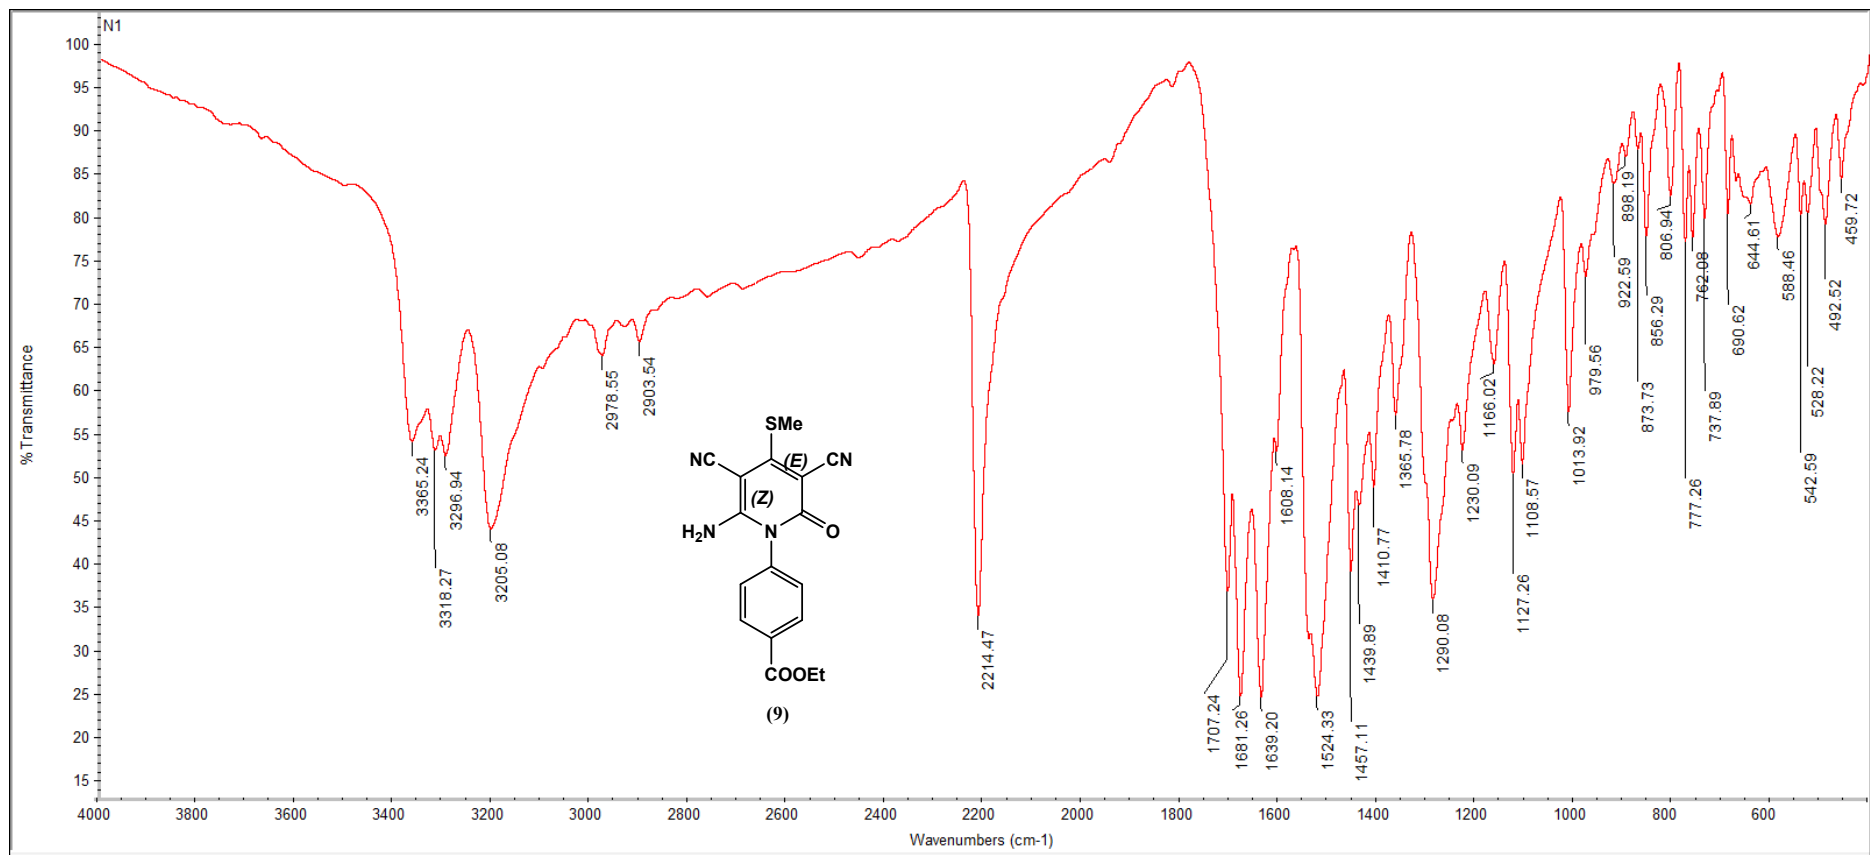



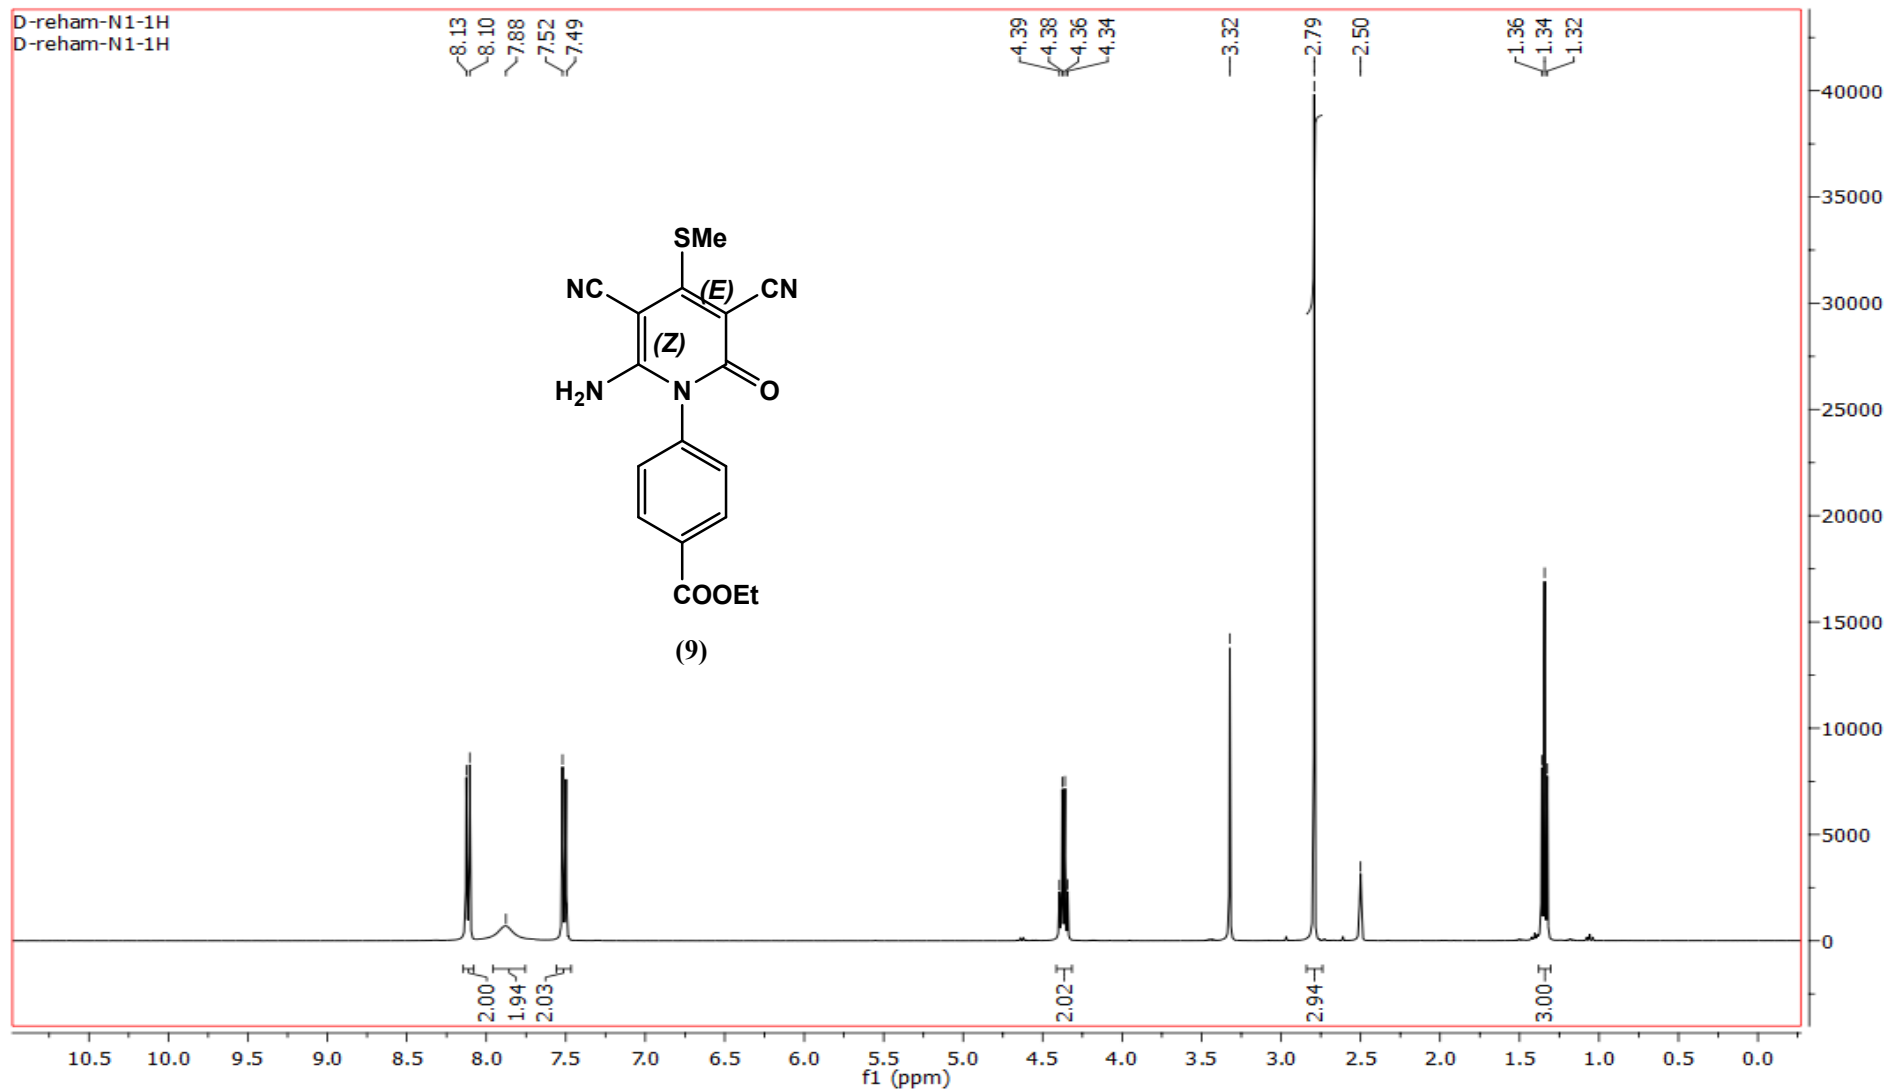

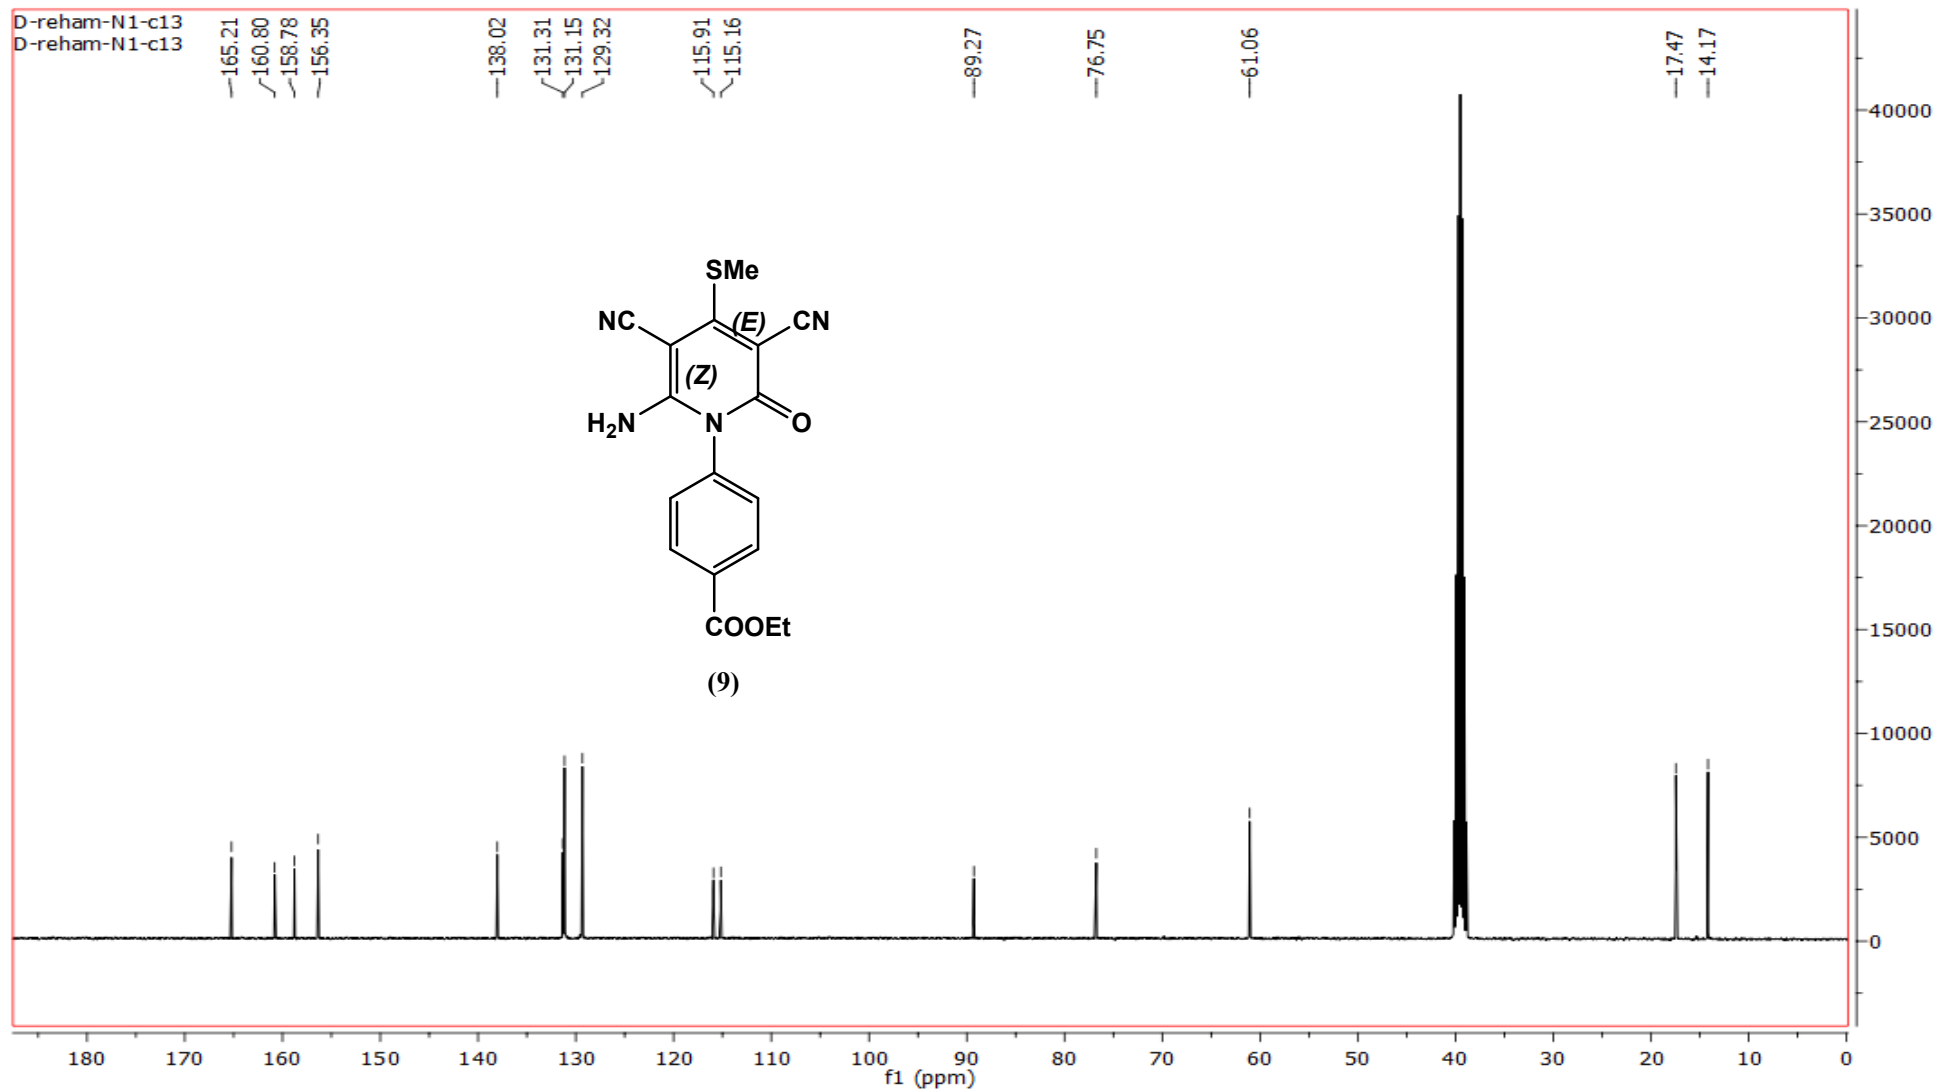

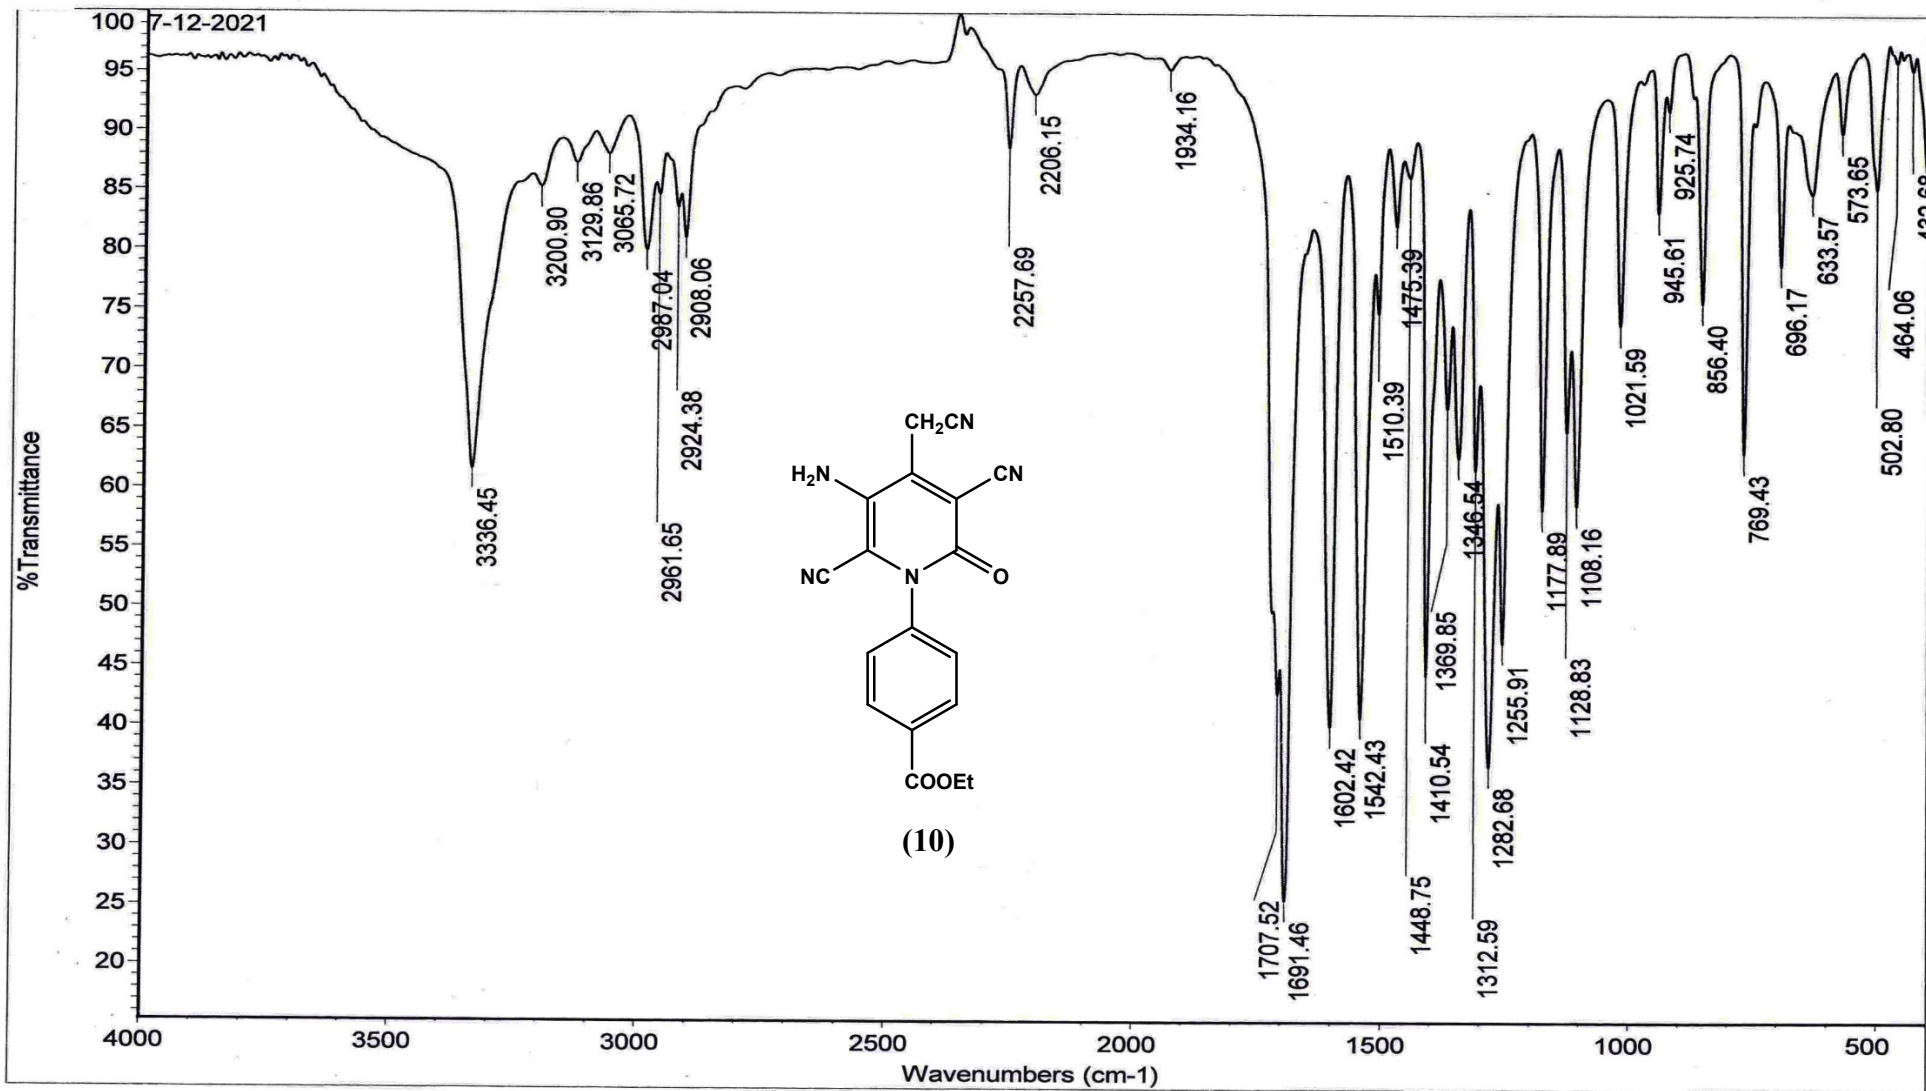

Dr\_Eman\_Fayed\_H10\_PROTON\_01  
Dr\_Eman\_Fayed\_H10

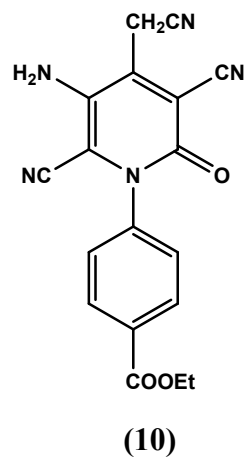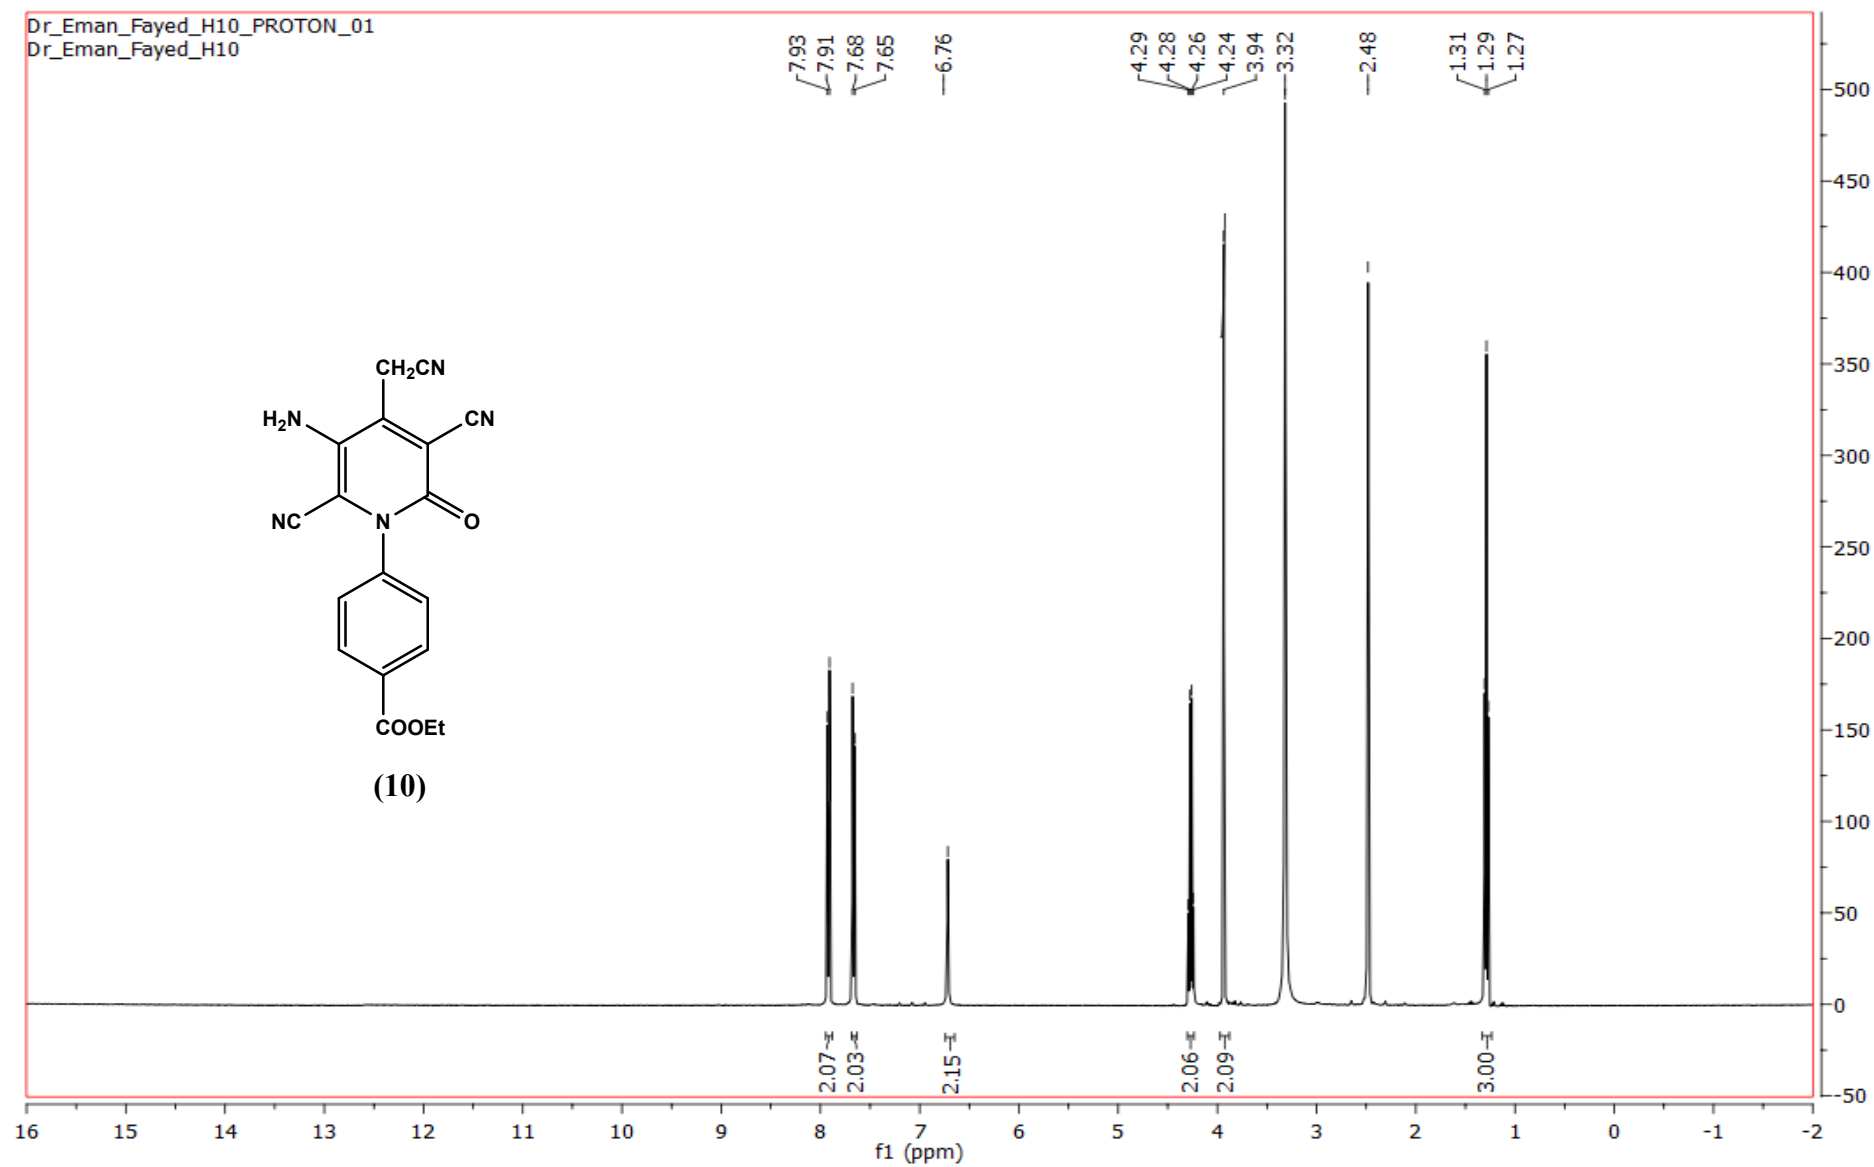

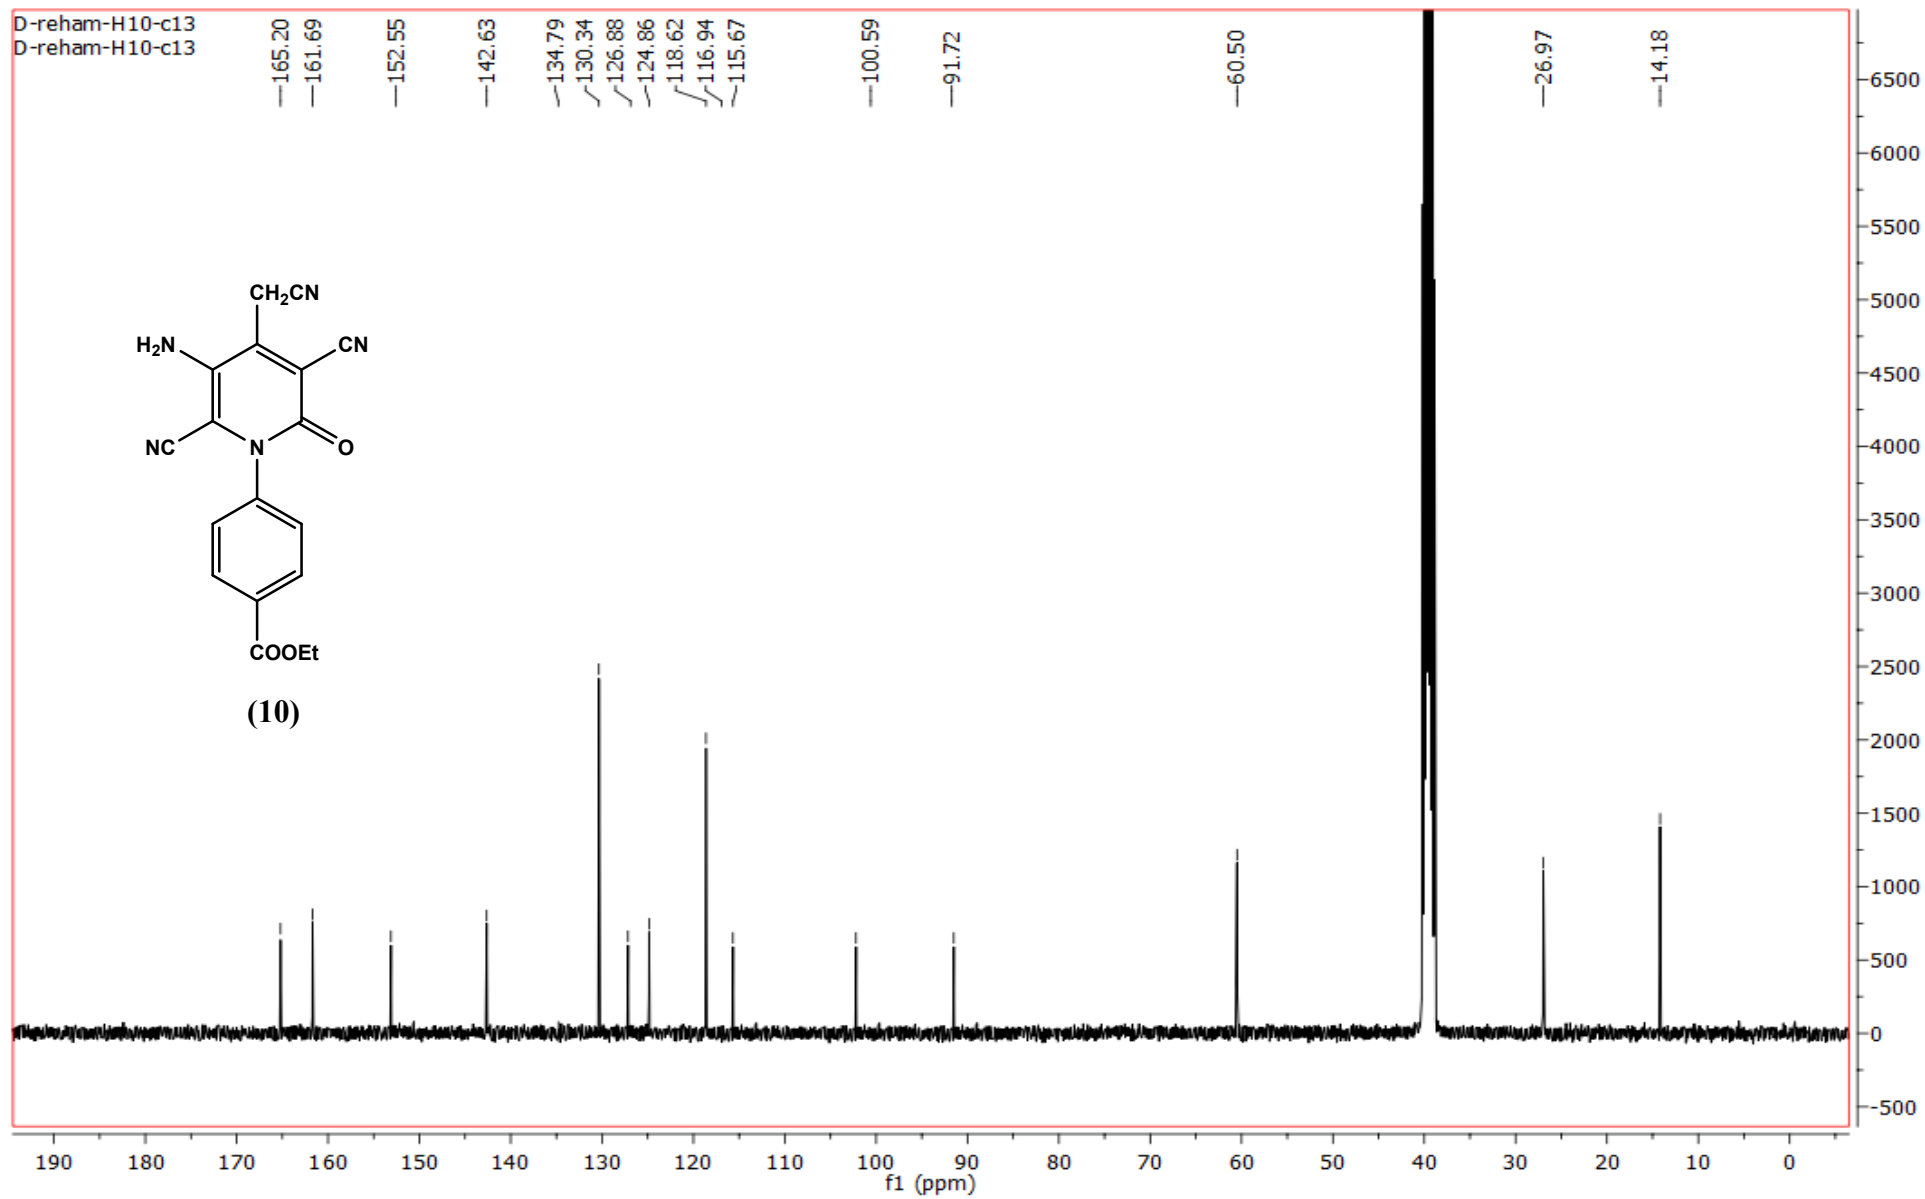

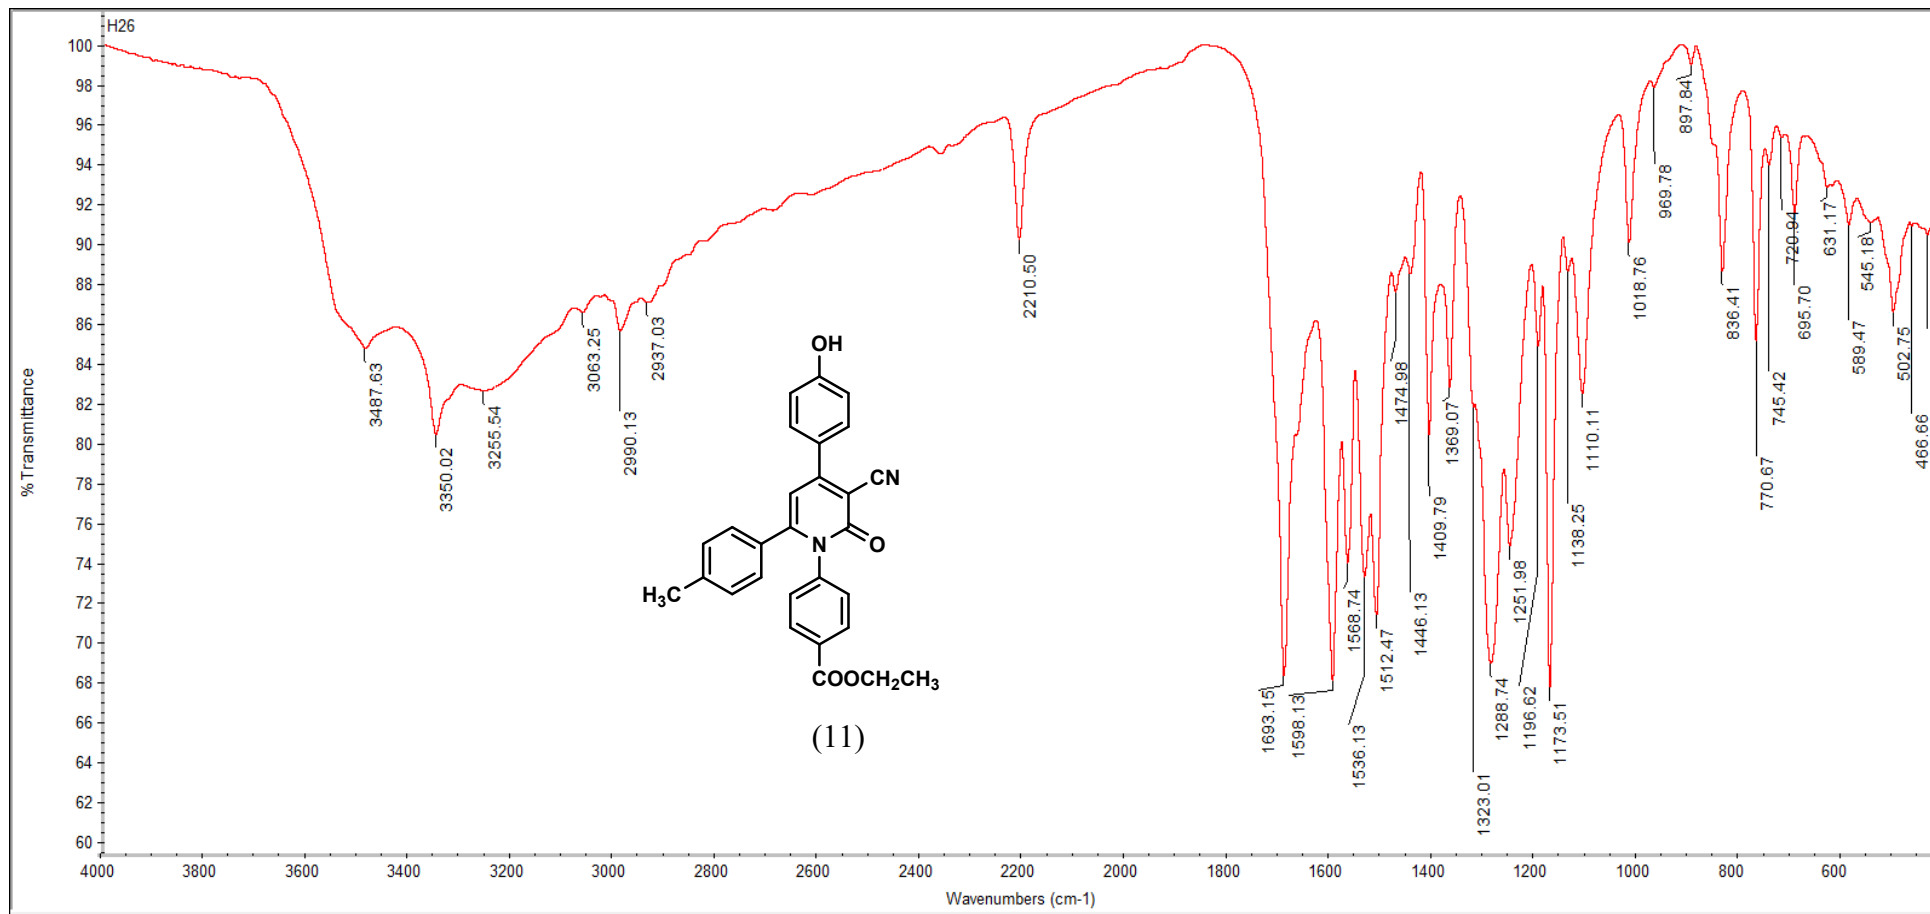



Dr\_Eman\_Fayed\_6\_PROTON\_01  
Dr\_Eman\_Fayed\_6

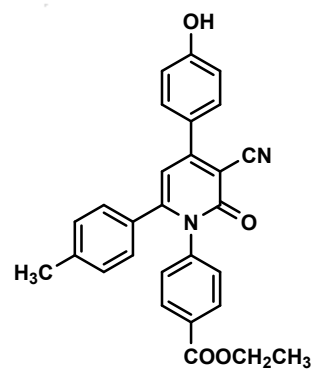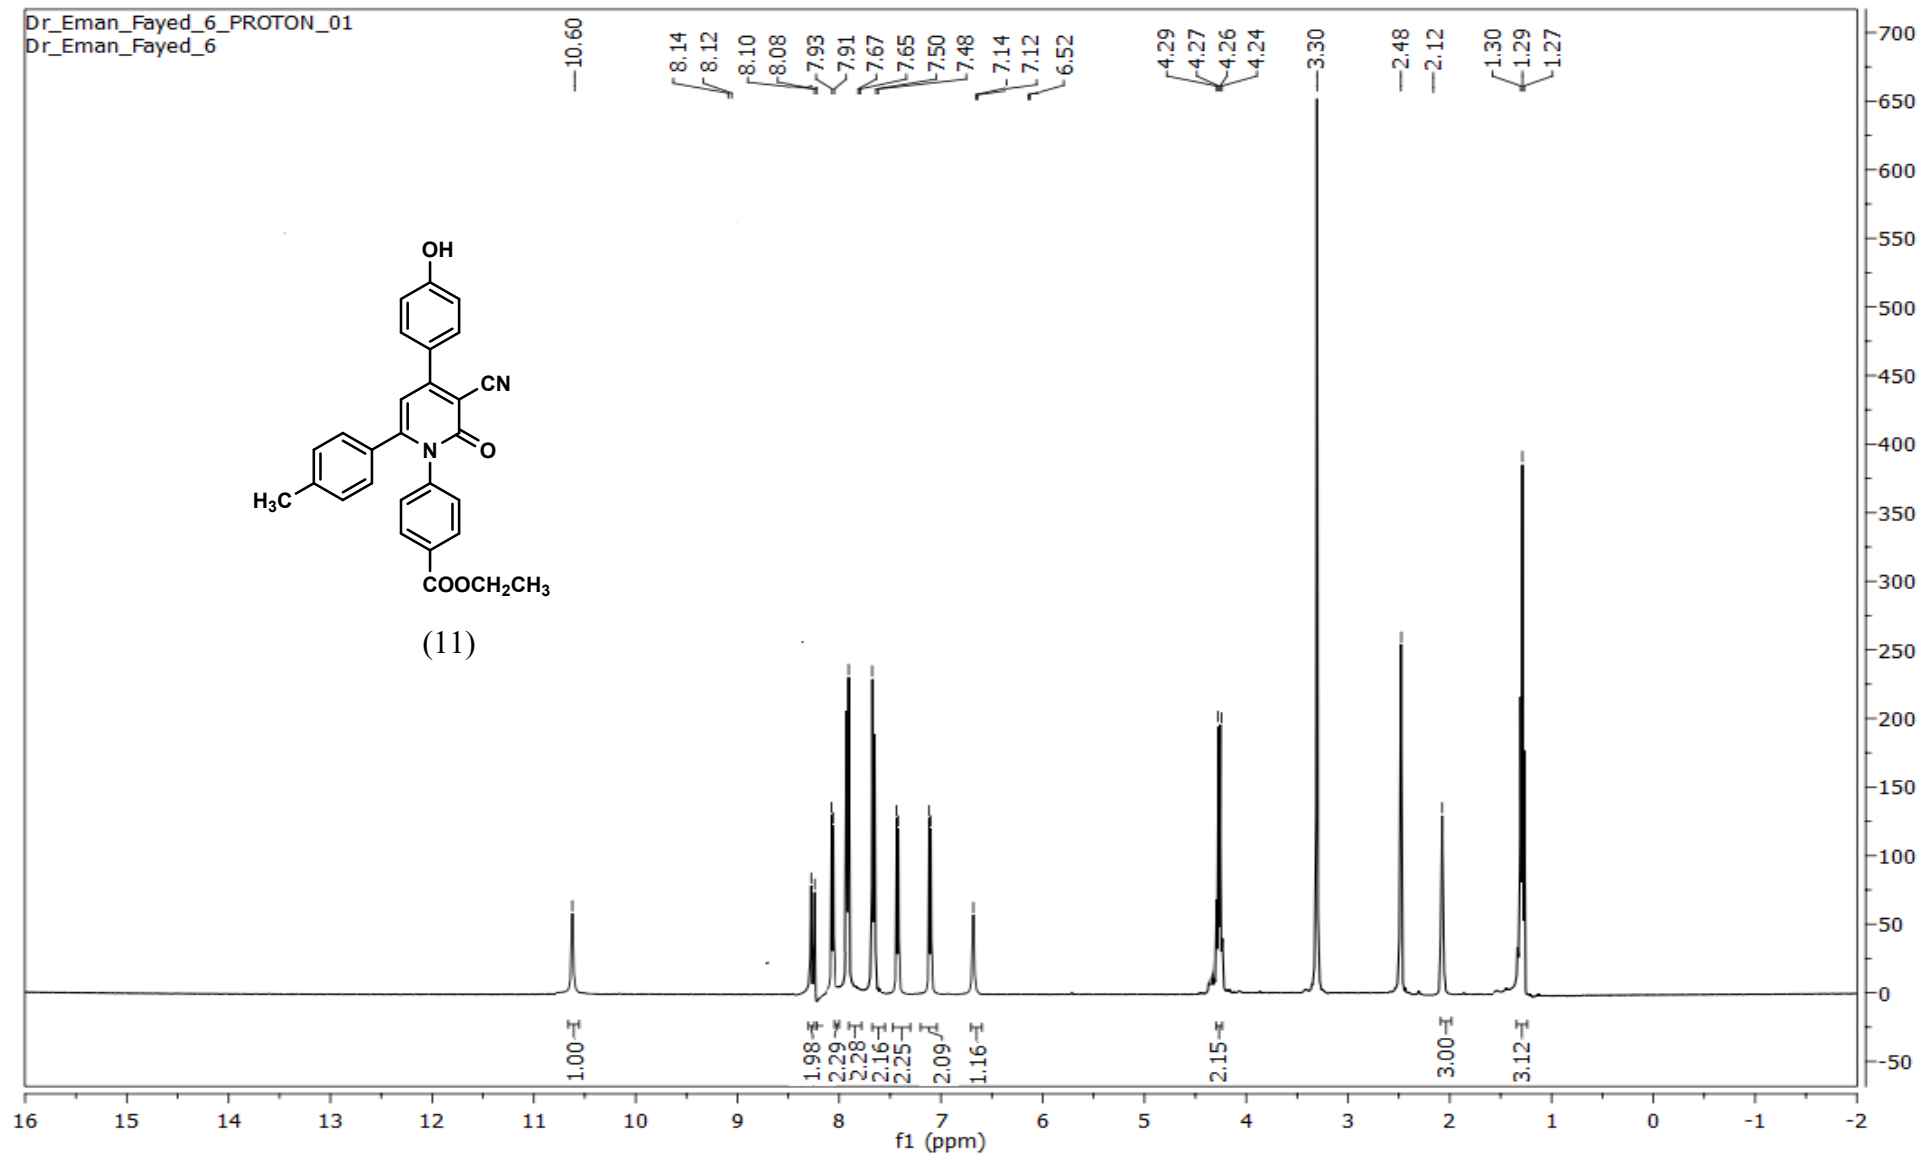

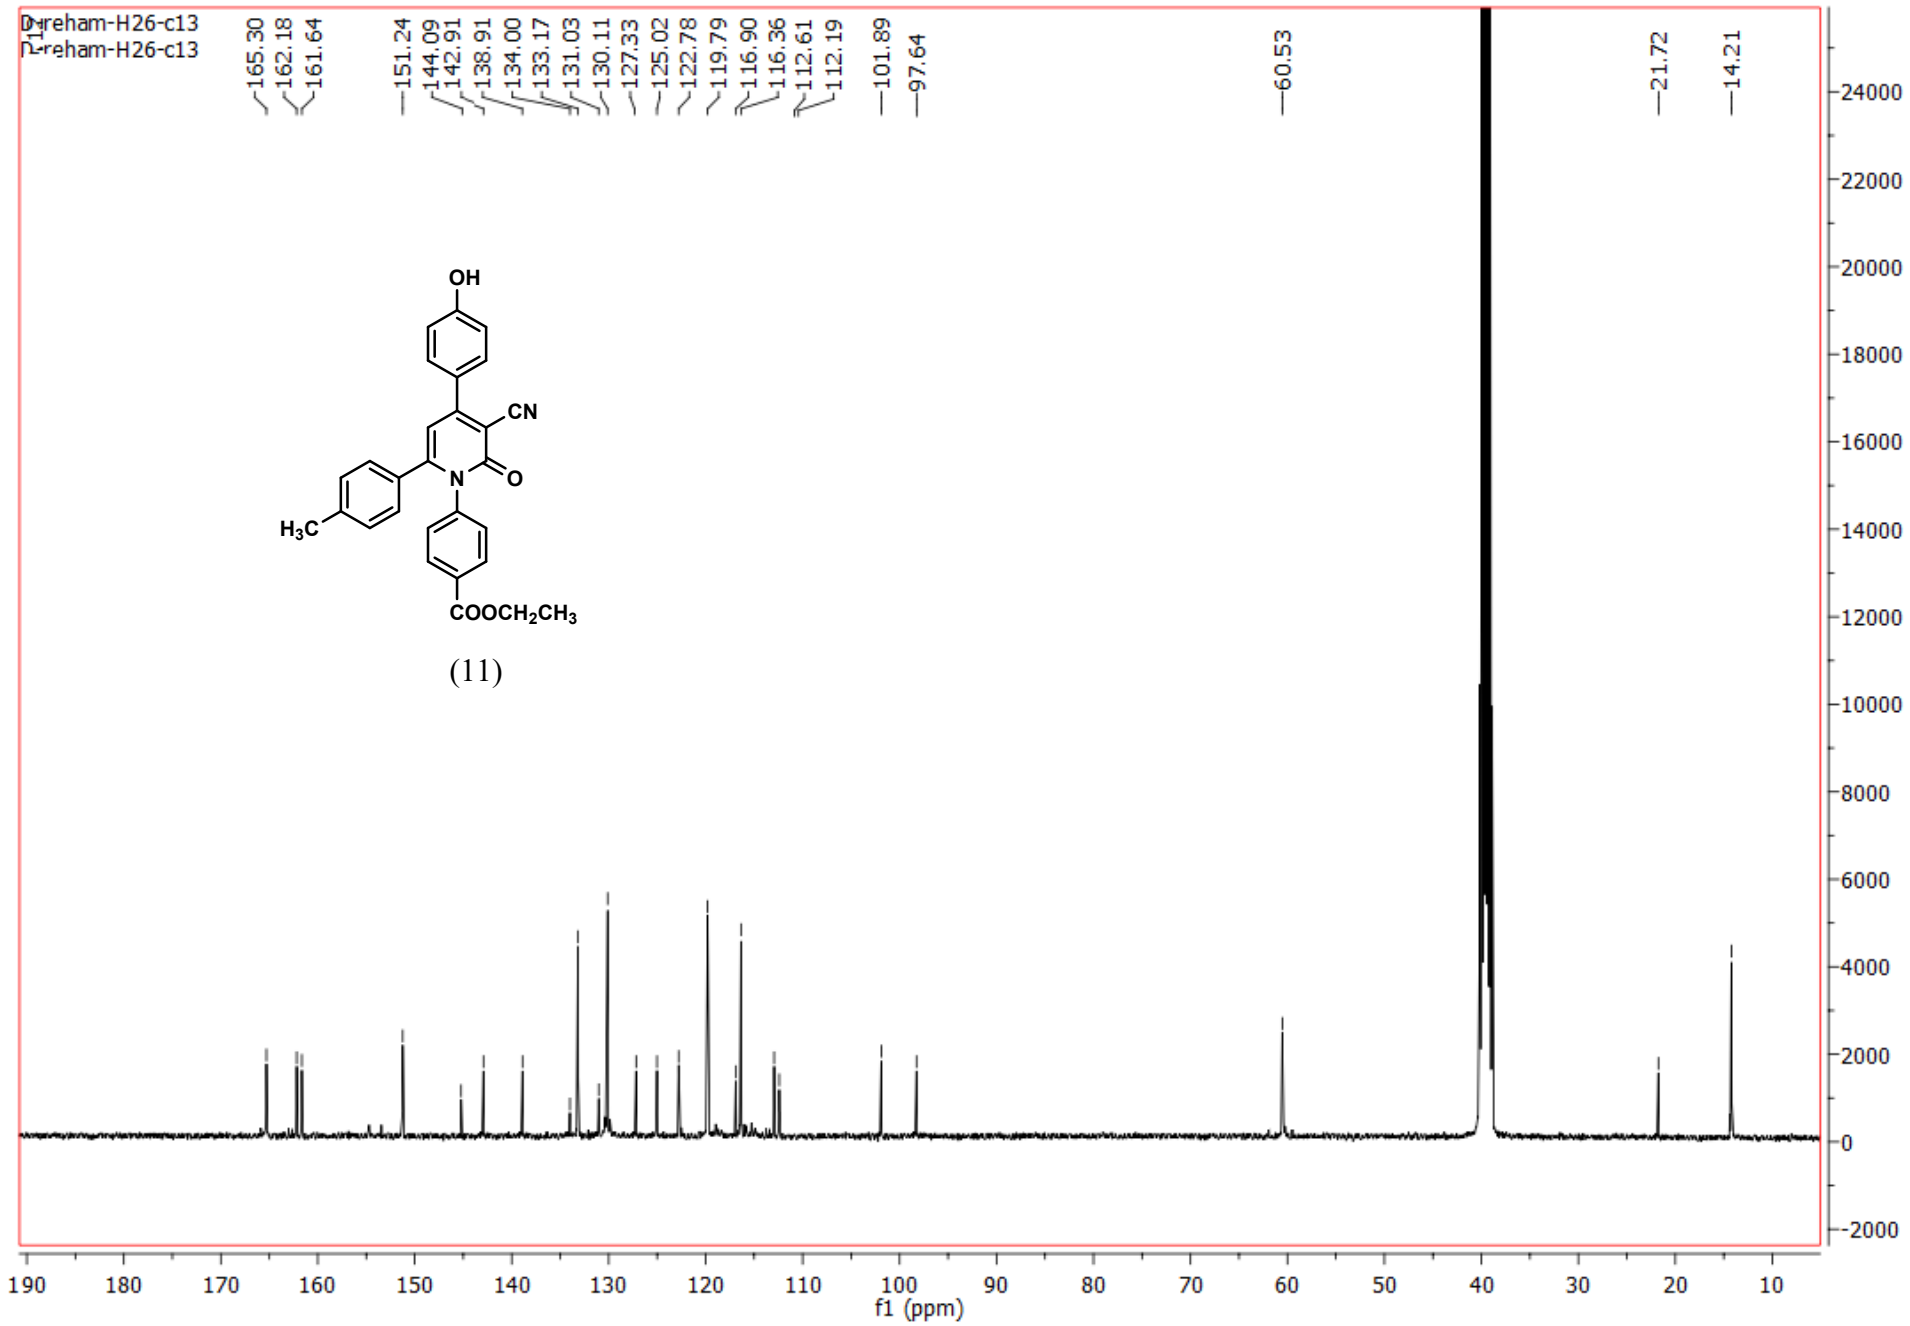

**Biological evaluation raw materials**

**Average of Relative viability of cells (%)**

| Conc.( $\mu$ M) | HePG-2 | Caco-2 |
|-----------------|--------|--------|
| <b>DOX</b>      |        |        |
| 100             | 6.3    | 15.1   |
| 50              | 11.2   | 24.7   |
| 25              | 14.1   | 36.8   |
| 12.5            | 28.3   | 42.6   |
| 6.25            | 45.8   | 62.0   |
| 3.125           | 57.6   | 78.3   |
| 1.56            | 71.2   | 100    |
| <b>2</b>        |        |        |
| 100             | 36.4   | 34.6   |
| 50              | 51.2   | 45.1   |
| 25              | 64.7   | 57.9   |
| 12.5            | 76.1   | 70.2   |
| 6.25            | 90.3   | 91.4   |
| 3.125           | 100    | 100    |
| 1.56            | 100    | 100    |
| <b>3a</b>       |        |        |
| 100             | 47.4   | 49.4   |
| 50              | 58.1   | 60.2   |
| 25              | 72.6   | 73.8   |
| 12.5            | 83.5   | 89.5   |
| 6.25            | 96.0   | 100    |
| 3.125           | 100    | 100    |
| 1.56            | 100    | 100    |
| <b>3b</b>       |        |        |
| 100             | 40.7   | 47.8   |
| 50              | 53.1   | 55.2   |
| 25              | 72.0   | 73.6   |
| 12.5            | 90.3   | 85.4   |
| 6.25            | 100    | 97.7   |
| 3.125           | 100    | 100    |
| 1.56            | 100    | 100    |
| <b>4</b>        |        |        |
| 100             | 26.5   | 33.9   |
| 50              | 37.9   | 44.0   |
| 25              | 50.0   | 52.1   |
| 12.5            | 64.2   | 70.6   |
| 6.25            | 78.6   | 85.2   |

|              |             |             |
|--------------|-------------|-------------|
| <b>3.125</b> | <b>96.5</b> | <b>100</b>  |
| <b>1.56</b>  | <b>100</b>  | <b>100</b>  |
| <b>5</b>     |             |             |
| <b>100</b>   | <b>13.0</b> | <b>8.3</b>  |
| <b>50</b>    | <b>18.6</b> | <b>16.9</b> |
| <b>25</b>    | <b>29.7</b> | <b>26.7</b> |
| <b>12.5</b>  | <b>38.1</b> | <b>40.1</b> |
| <b>6.25</b>  | <b>64.5</b> | <b>59.2</b> |
| <b>3.125</b> | <b>77.2</b> | <b>79.6</b> |
| <b>1.56</b>  | <b>98.5</b> | <b>95.3</b> |
| <b>6</b>     |             |             |
| <b>100</b>   | <b>35.6</b> | <b>34.6</b> |
| <b>50</b>    | <b>42.7</b> | <b>48.3</b> |
| <b>25</b>    | <b>56.3</b> | <b>60.7</b> |
| <b>12.5</b>  | <b>68.1</b> | <b>73.9</b> |
| <b>6.25</b>  | <b>90.2</b> | <b>87.5</b> |
| <b>3.125</b> | <b>100</b>  | <b>100</b>  |
| <b>1.56</b>  | <b>100</b>  | <b>100</b>  |
| <b>7</b>     |             |             |
| <b>100</b>   | <b>10.7</b> | <b>8.6</b>  |
| <b>50</b>    | <b>17.9</b> | <b>16.1</b> |
| <b>25</b>    | <b>23.5</b> | <b>24.9</b> |
| <b>12.5</b>  | <b>37.7</b> | <b>33.6</b> |
| <b>6.25</b>  | <b>61.3</b> | <b>50.4</b> |
| <b>3.125</b> | <b>69.3</b> | <b>72.7</b> |
| <b>1.56</b>  | <b>94.2</b> | <b>96.0</b> |
| <b>8</b>     |             |             |
| <b>100</b>   | <b>7.8</b>  | <b>18.3</b> |
| <b>50</b>    | <b>16.1</b> | <b>27.1</b> |
| <b>25</b>    | <b>26.3</b> | <b>33.4</b> |
| <b>12.5</b>  | <b>33.9</b> | <b>40.6</b> |
| <b>6.25</b>  | <b>58.6</b> | <b>69.2</b> |
| <b>3.125</b> | <b>74.5</b> | <b>85.9</b> |
| <b>1.56</b>  | <b>88.2</b> | <b>100</b>  |
| <b>9</b>     |             |             |
| <b>100</b>   | <b>30.2</b> | <b>38.9</b> |
| <b>50</b>    | <b>42.7</b> | <b>53.1</b> |
| <b>25</b>    | <b>56.1</b> | <b>64.8</b> |
| <b>12.5</b>  | <b>67.5</b> | <b>77.6</b> |
| <b>6.25</b>  | <b>79.4</b> | <b>98.5</b> |
| <b>3.125</b> | <b>99.8</b> | <b>100</b>  |
| <b>1.56</b>  | <b>100</b>  | <b>100</b>  |
| <b>10</b>    |             |             |
| <b>100</b>   | <b>24.5</b> | <b>29.3</b> |
| <b>50</b>    | <b>35.1</b> | <b>44.7</b> |

|              |             |             |
|--------------|-------------|-------------|
| <b>25</b>    | <b>50.9</b> | <b>59.1</b> |
| <b>12.5</b>  | <b>63.6</b> | <b>64.0</b> |
| <b>6.25</b>  | <b>71.8</b> | <b>95.4</b> |
| <b>3.125</b> | <b>90.2</b> | <b>100</b>  |
| <b>1.56</b>  | <b>100</b>  | <b>100</b>  |
| <b>11</b>    |             |             |
| <b>100</b>   | <b>18.3</b> | <b>23.7</b> |
| <b>50</b>    | <b>25.6</b> | <b>30.2</b> |
| <b>25</b>    | <b>33.1</b> | <b>39.1</b> |
| <b>12.5</b>  | <b>50.4</b> | <b>55.3</b> |
| <b>6.25</b>  | <b>67.9</b> | <b>73.8</b> |
| <b>3.125</b> | <b>88.0</b> | <b>90.4</b> |
| <b>1.56</b>  | <b>100</b>  | <b>100</b>  |
| <b>100</b>   | <b>21.3</b> | <b>26.1</b> |
| <b>50</b>    | <b>32.8</b> | <b>38.3</b> |

# Lab Report

| Ser | Sample        |       |       | RT-PCR<br>Results<br>Fold Change |       |  |
|-----|---------------|-------|-------|----------------------------------|-------|--|
|     | code          | cells | IC50  | Bax                              | Bcl2  |  |
|     | 1             | 5     | Caco2 | 9.78                             | 4.508 |  |
| 2   | 7             | Caco2 | 7.83  | 7.508                            | 0.194 |  |
| 3   | 8             | Caco2 | 13.61 | 4.188                            | 0.275 |  |
| 4   | Staurosporine | Caco2 | 5.07  | 7.648                            | 0.321 |  |
| 5   | control       | Caco2 | ---   | 1                                | 1     |  |

# Quantitation Report

## Experiment Information

|                         |                             |
|-------------------------|-----------------------------|
| Run Name                | Run 2022-08-12 (1)          |
| Run Start               | 2022-08-12 01:55:02 PM      |
| Run Finish              | 2022-08-12 04:27:17 PM      |
| Operator                | ERA                         |
| Notes                   | ---                         |
| Run On Software Version | Rotor-Gene 1.7.87           |
| Run Signature           | The Run Signature is valid. |
| Gain Green              | 10.                         |
| Gain Yellow             | 9.33                        |

## Quantitation data

This report generated by Rotor-Gene 6000 Series Software 1.7 (Build 87)  
 Copyright ©2000-2006 Corbett Research, a Division of Corbett Life Science. All rights reserved.  
 ISO 9001:2000 (Reg. No. QEC21313)

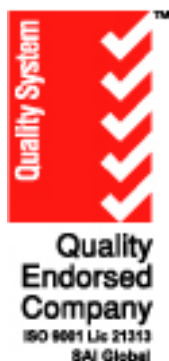

### primers

Bax : F 5'- TCAGGATGCGTCCACCAAGAAG-3',

Bax : R 5'-TGTGTCCACGGCGCAATCATC-3'.

bcl2 : F 5'-ATGTGTGTGGAGACCGTCAA-3',

bcl2 : R 5'-GCCGTACAGTCCACAAAGG-3'.

GAPDH : F 5'- GTCTCCTGACTTCAACAGCG-3'

GAPDH : R 5'- ACCACCCTGTTGCTGTAGCCAA-3'

| Sample |               |      | Bax           |       |              |            |       |              |                            |                      |
|--------|---------------|------|---------------|-------|--------------|------------|-------|--------------|----------------------------|----------------------|
| Ser    | code          | Conc | Control cells |       |              | Test cells |       |              |                            | FLD                  |
|        |               |      | GAPDH         | Bax   | $\Delta$ CTC | GAPDH      | Bax   | $\Delta$ CTE | $\Delta\Delta$ CT          | $2^{\Delta\Delta$ CT |
|        |               |      | HC            | TC    | TC-HC        | HE         | TE    | TE-HE        | $\Delta$ CTE- $\Delta$ CTC | E=1.849              |
| 1      | 5             |      | 22.07         | 35.25 | 13.18        | 22.18      | 32.91 | 10.73        | -2.45                      | 4.508                |
| 2      | 7             |      | 22.07         | 35.25 | 13.18        | 22.29      | 32.19 | 9.9          | -3.28                      | 7.508                |
| 3      | 8             |      | 22.07         | 35.25 | 13.18        | 21.94      | 32.79 | 10.85        | -2.33                      | 4.188                |
| 4      | Staurosporine |      | 22.07         | 35.25 | 13.18        | 22.36      | 32.23 | 9.87         | -3.31                      | 7.648                |
| 5      | control       |      | 22.07         | 35.25 | 13.18        | 22.07      | 35.25 | 13.18        | 0                          | 1                    |

| Sample |               |      | bcl2          |       |              |            |       |              |                            |                      |
|--------|---------------|------|---------------|-------|--------------|------------|-------|--------------|----------------------------|----------------------|
| Ser    | code          | Conc | Control cells |       |              | Test cells |       |              |                            | FLD                  |
|        |               |      | GAPDH         | bcl2  | $\Delta$ CTC | GAPDH      | bcl2  | $\Delta$ CTE | $\Delta\Delta$ CT          | $2^{\Delta\Delta$ CT |
|        |               |      | HC            | TC    | TC-HC        | HE         | TE    | TE-HE        | $\Delta$ CTE- $\Delta$ CTC | E=1.849              |
| 1      | 5             |      | 22.07         | 27.49 | 5.42         | 22.18      | 28.95 | 6.77         | 1.35                       | 0.436                |
| 2      | 7             |      | 22.07         | 27.49 | 5.42         | 21.94      | 30.03 | 8.09         | 2.67                       | 0.194                |
| 3      | 8             |      | 22.07         | 27.49 | 5.42         | 22.29      | 29.81 | 7.52         | 2.1                        | 0.275                |
| 4      | Staurosporine |      | 22.07         | 27.49 | 5.42         | 22.36      | 29.63 | 7.27         | 1.85                       | 0.321                |
| 5      | control       |      | 22.07         | 27.49 | 5.42         | 22.07      | 27.49 | 5.42         | 0                          | 1                    |



# Lab Report

| ser | Compound  |             | EGFR       |  | SD<br>± |
|-----|-----------|-------------|------------|--|---------|
|     | code      | MW<br>g/mol | IC50<br>uM |  |         |
| 1   | 7         | 293         | 0.124      |  | 0.009   |
| *** | Erlotinib | 393.436     | 0.033      |  | 0.002   |

## Detailed Results

### EGFR

| code                                                                                | IC50 | conc | log | %inh  | T2 | T1 | ΔT | RFU2  | RFU1 | ΔRFU  | slope  | K.Activity |
|-------------------------------------------------------------------------------------|------|------|-----|-------|----|----|----|-------|------|-------|--------|------------|
| 7                                                                                   |      | 100  | 2   | 93.03 | 30 | 0  | 30 | 6.97  | 0    | 6.97  | 3.3333 | 8.36408    |
| 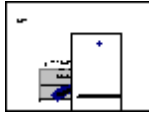 |      | 10   | 1   | 88.41 | 30 | 0  | 30 | 11.59 | 0    | 11.59 | 3.3333 | 13.9081    |
|                                                                                     |      | 1    | 0   | 68.08 | 30 | 0  | 30 | 31.92 | 0    | 31.92 | 3.3333 | 38.3044    |
|                                                                                     |      | 0.1  | -1  | 50.14 | 30 | 0  | 30 | 49.86 | 0    | 49.86 | 3.3333 | 59.8326    |
|                                                                                     |      | 0.01 | -2  | 27.33 | 30 | 0  | 30 | 72.67 | 0    | 72.67 | 3.3333 | 87.2049    |
|                                                                                     | EC   |      |     |       | 0  | 30 | 0  | 30    | 100  | 0     | 100    | 3.3333     |

| code                                                                                | IC50 | conc | log | %inh  | T2 | T1 | ΔT | RFU2  | RFU1 | ΔRFU  | slope  | K.Activity |
|-------------------------------------------------------------------------------------|------|------|-----|-------|----|----|----|-------|------|-------|--------|------------|
| Erlotinib                                                                           |      | 100  | 2   | 95.73 | 30 | 0  | 30 | 4.27  | 0    | 4.27  | 3.3333 | 5.12405    |
|  |      | 10   | 1   | 92.85 | 30 | 0  | 30 | 7.15  | 0    | 7.15  | 3.3333 | 8.58009    |
|                                                                                     |      | 1    | 0   | 80.06 | 30 | 0  | 30 | 19.94 | 0    | 19.94 | 3.3333 | 23.9282    |
|                                                                                     |      | 0.1  | -1  | 57.63 | 30 | 0  | 30 | 42.37 | 0    | 42.37 | 3.3333 | 50.8445    |
|                                                                                     |      | 0.01 | -2  | 36.88 | 30 | 0  | 30 | 63.12 | 0    | 63.12 | 3.3333 | 75.7448    |
|                                                                                     | EC   |      |     |       | 0  | 30 | 0  | 30    | 100  | 0     | 100    | 3.3333     |

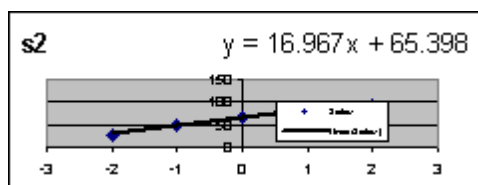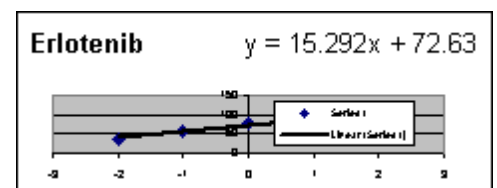

| ser | Compound  |             | VEGFR2     |  | SD<br>± |
|-----|-----------|-------------|------------|--|---------|
|     | code      | MW<br>g/mol | IC50<br>uM |  |         |
| 1   | 7         | 293         | 0.221      |  | 0.009   |
| *** | Sorafenib | 464.8       | 0.043      |  | 0.002   |

**Detailed results**

| VEGFR2    |      |      |     |       |    |    |    |       |      |       |        |            |
|-----------|------|------|-----|-------|----|----|----|-------|------|-------|--------|------------|
| code      | IC50 | conc | log | %inh  | T2 | T1 | ΔT | RFU2  | RFU1 | ΔRFU  | slope  | K.Activity |
| 7         |      | 100  | 2   | 92.44 | 30 | 0  | 30 | 7.56  | 0    | 7.56  | 3.3333 | 9.07209    |
|           |      | 10   | 1   | 87.03 | 30 | 0  | 30 | 12.97 | 0    | 12.97 | 3.3333 | 15.5642    |
|           |      | 1    | 0   | 64.12 | 30 | 0  | 30 | 35.88 | 0    | 35.88 | 3.3333 | 43.0564    |
|           |      | 0.1  | -1  | 44.03 | 30 | 0  | 30 | 55.97 | 0    | 55.97 | 3.3333 | 67.1647    |
|           |      | 0.01 | -2  | 22.41 | 30 | 0  | 30 | 77.59 | 0    | 77.59 | 3.3333 | 93.1089    |
| EC        |      |      |     | 0     | 30 | 0  | 30 | 100   | 0    | 100   | 3.3333 | 120        |
|           |      |      |     |       |    |    |    |       |      |       |        |            |
| code      | IC50 | conc | log | %inh  | T2 | T1 | ΔT | RFU2  | RFU1 | ΔRFU  | slope  | K.Activity |
| Sorafenib |      | 100  | 2   | 95.93 | 30 | 0  | 30 | 4.07  | 0    | 4.07  | 3.3333 | 4.88405    |
|           |      | 10   | 1   | 92.08 | 30 | 0  | 30 | 7.92  | 0    | 7.92  | 3.3333 | 9.5041     |
|           |      | 1    | 0   | 80.89 | 30 | 0  | 30 | 19.11 | 0    | 19.11 | 3.3333 | 22.9322    |
|           |      | 0.1  | -1  | 53.47 | 30 | 0  | 30 | 46.53 | 0    | 46.53 | 3.3333 | 55.8366    |
|           |      | 0.01 | -2  | 35.81 | 30 | 0  | 30 | 64.19 | 0    | 64.19 | 3.3333 | 77.0288    |
| EC        |      |      |     | 0     | 30 | 0  | 30 | 100   | 0    | 100   | 3.3333 | 120        |
|           |      |      |     |       |    |    |    |       |      |       |        |            |

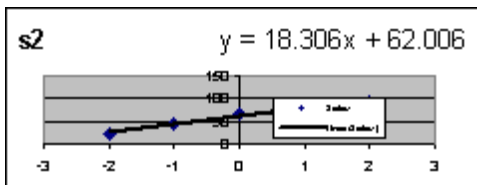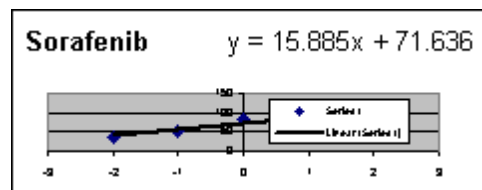

Docking  
simulation  
figures

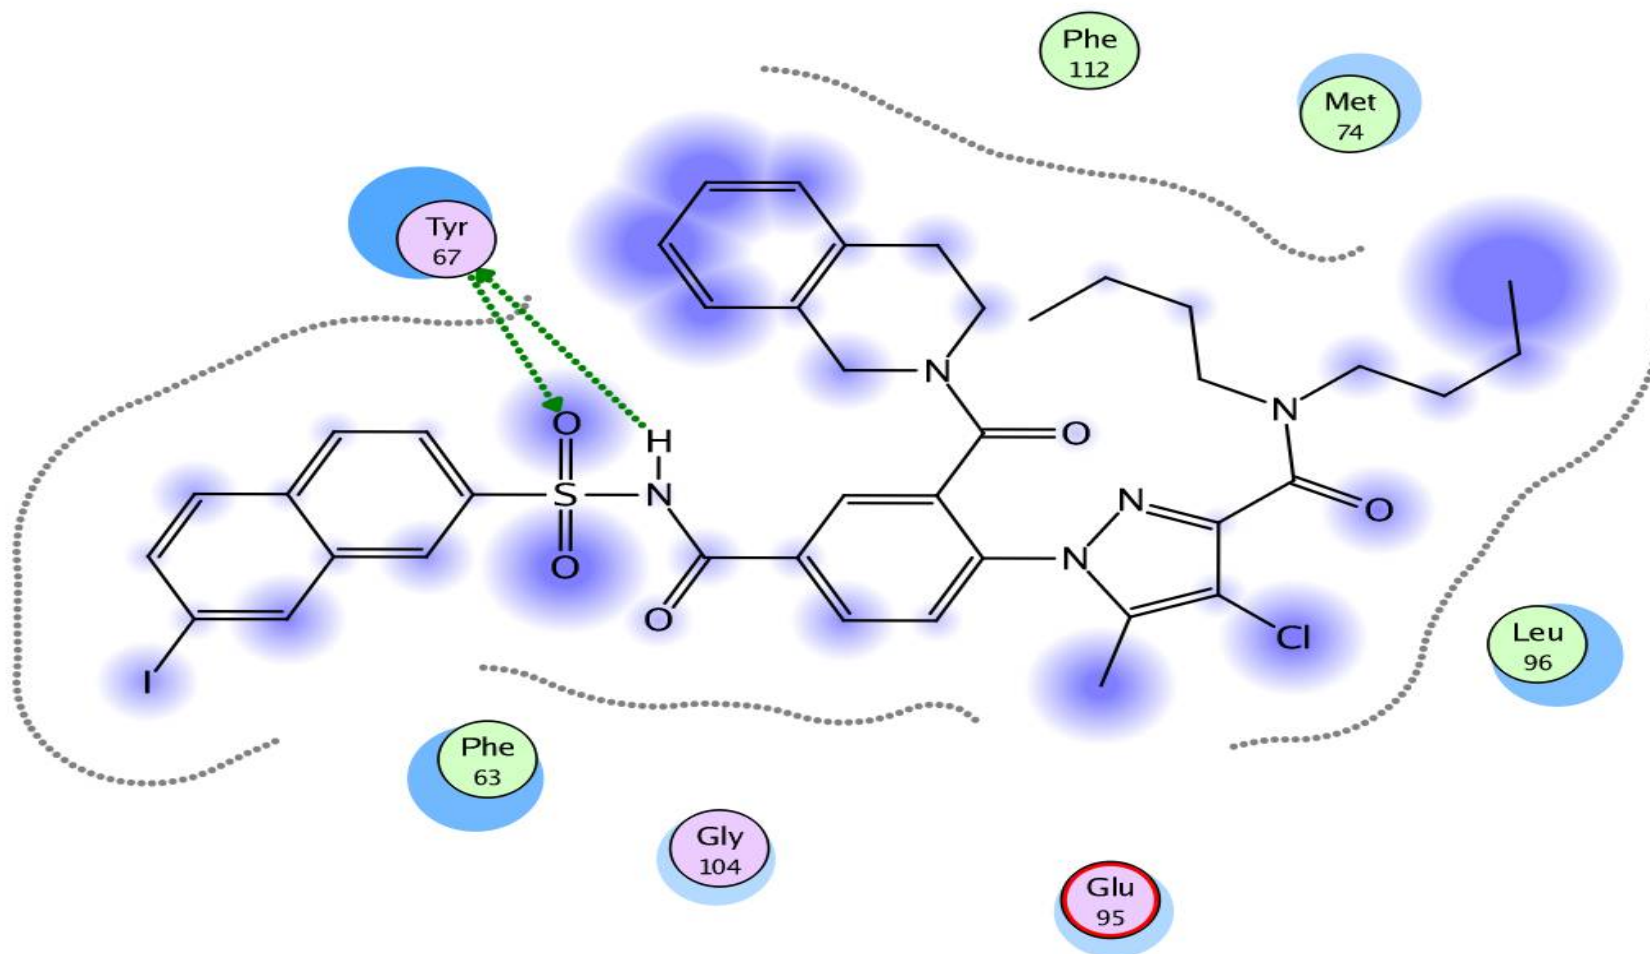

2D binding mode of co-crystallized ligand inside Bcl-2 binding pocket (PDB: 4AQ3)

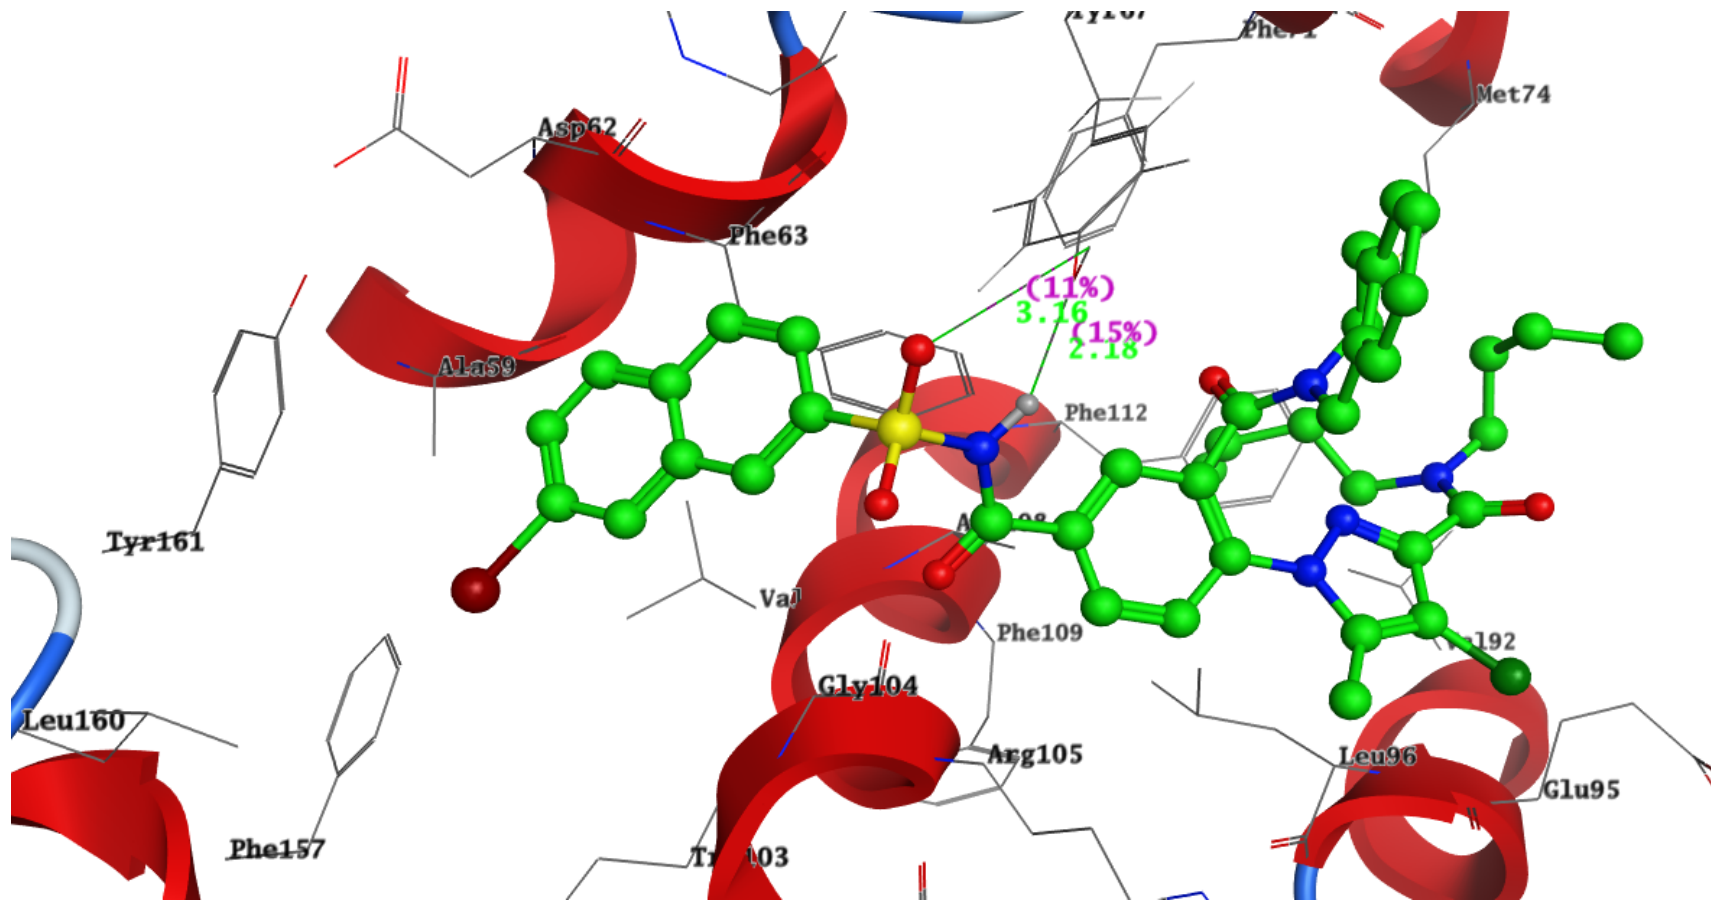

3D binding mode of co-crystallized ligand inside Bcl-2 binding pocket (PDB: 4AQ3)

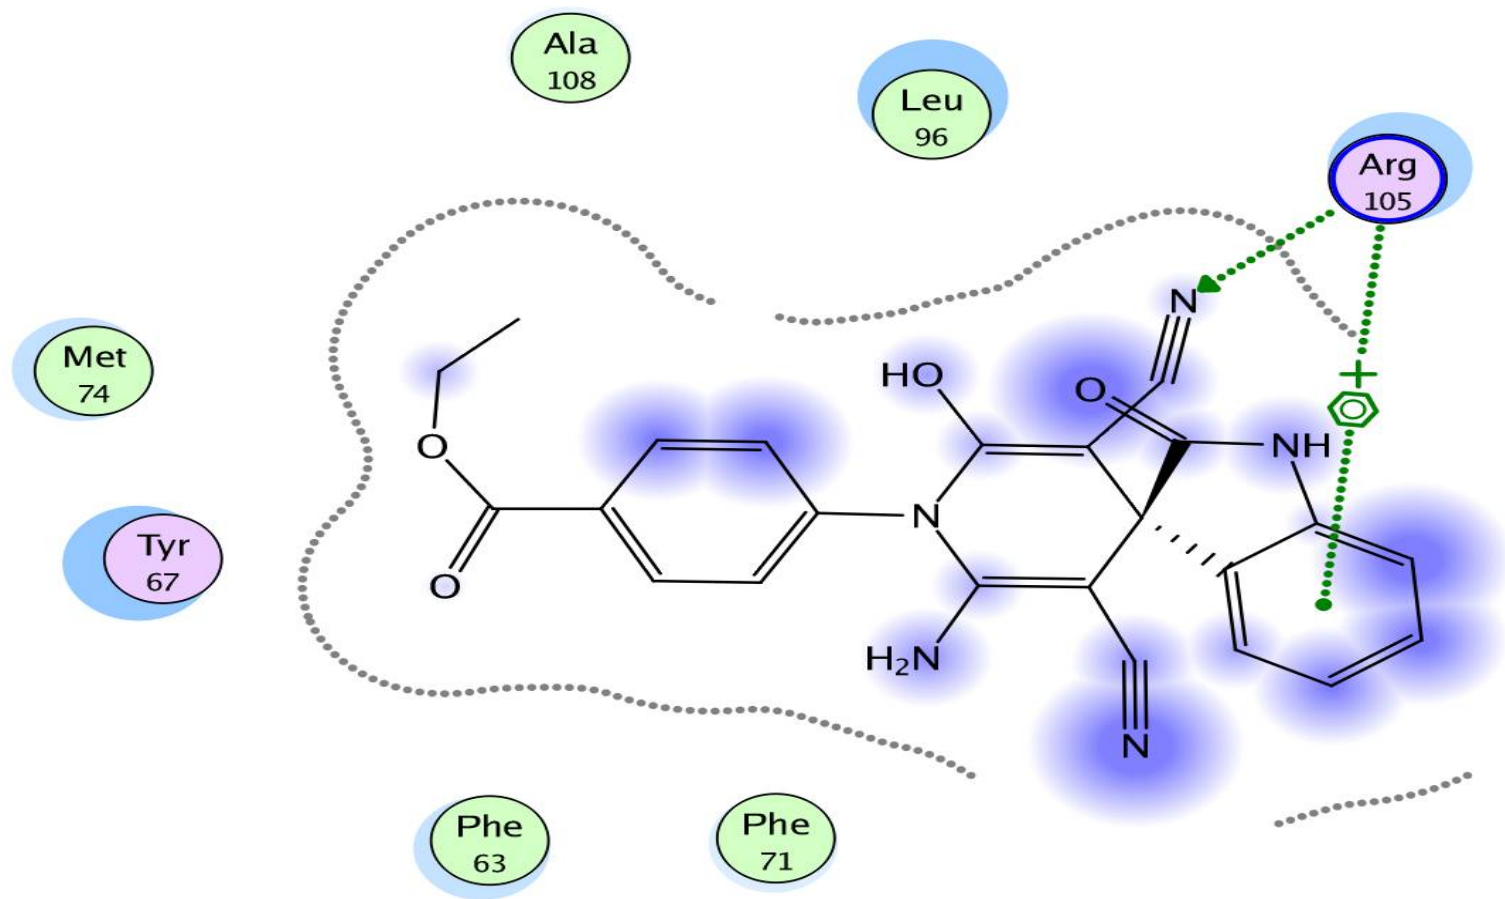

2D binding mode of 2-oxo-1'H-spiro-indoline-3,4'-pyridine 7 inside Bcl-2 binding pocket (**PDB: 4AQ3**)

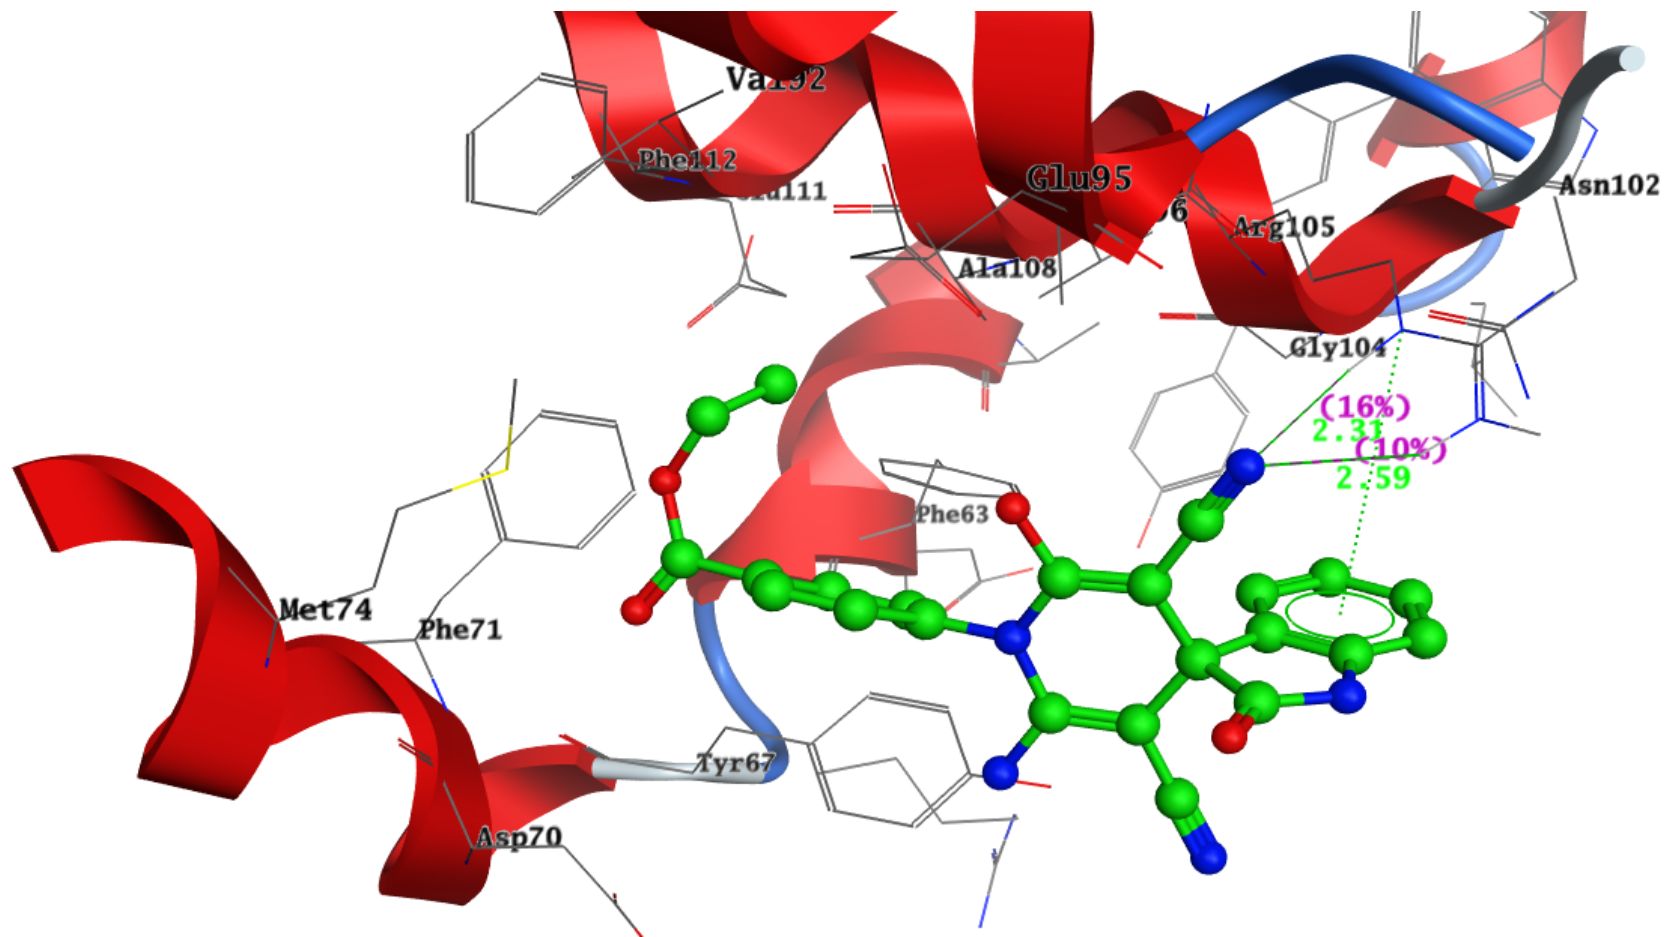

3D binding mode of 2-oxo-1'H-spiro-indoline-3,4'-pyridine 7 inside Bcl-2 binding pocket (PDB: 4AQ3)

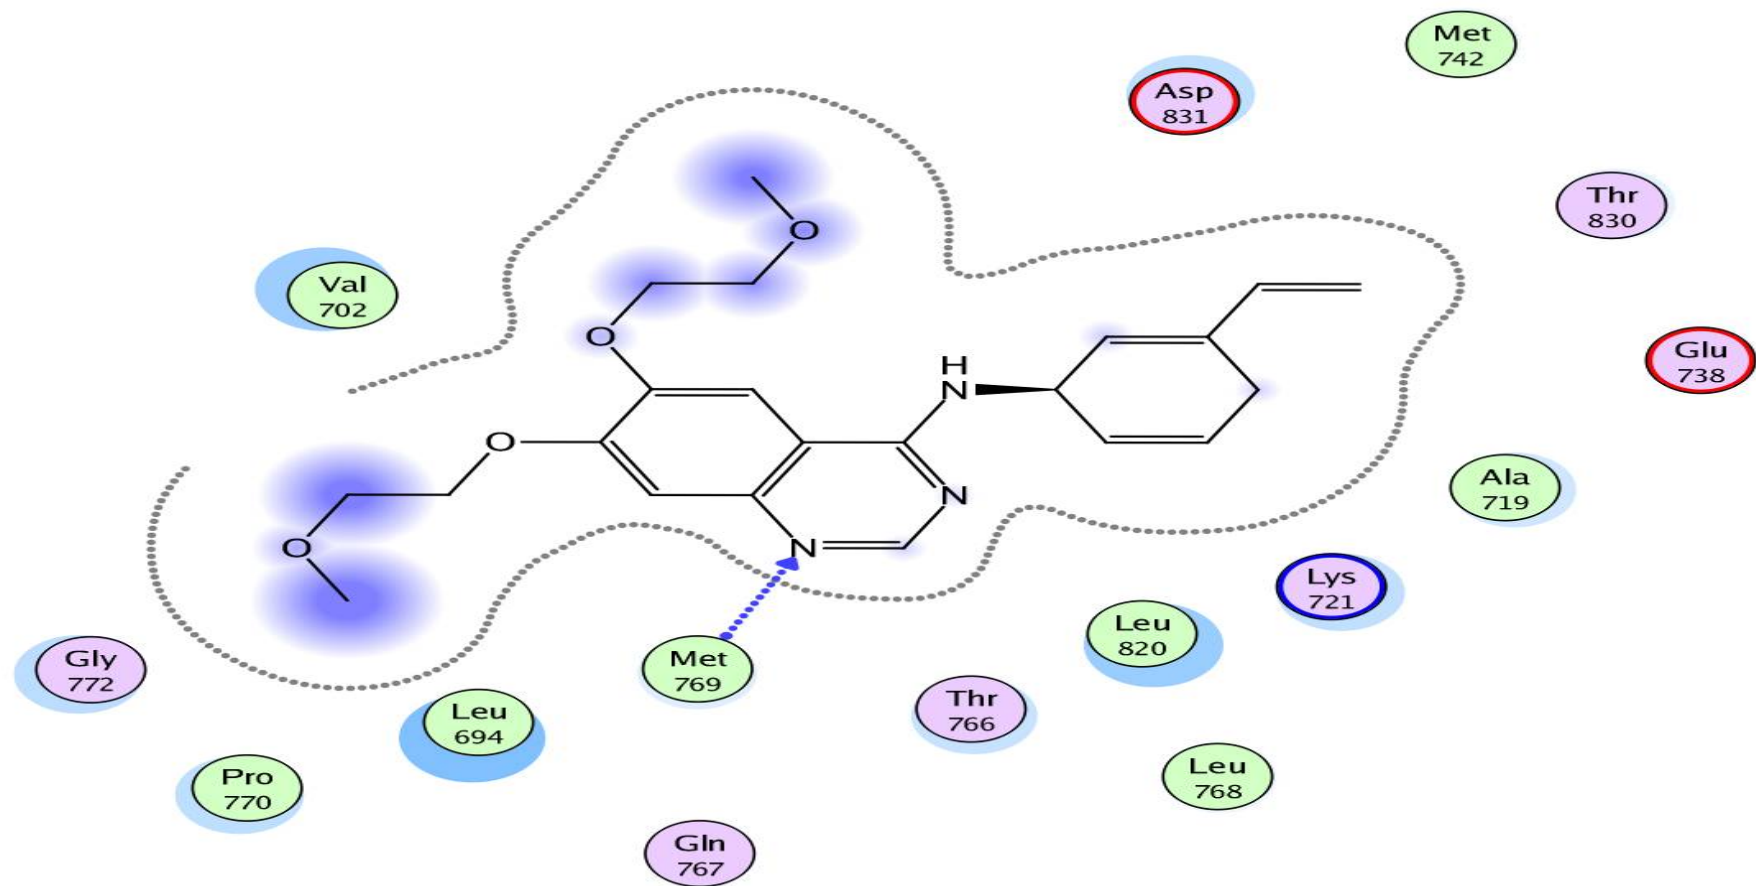

2D binding mode of co-crystallized ligand inside the EGFR binding pocket (PDB: 1M17)



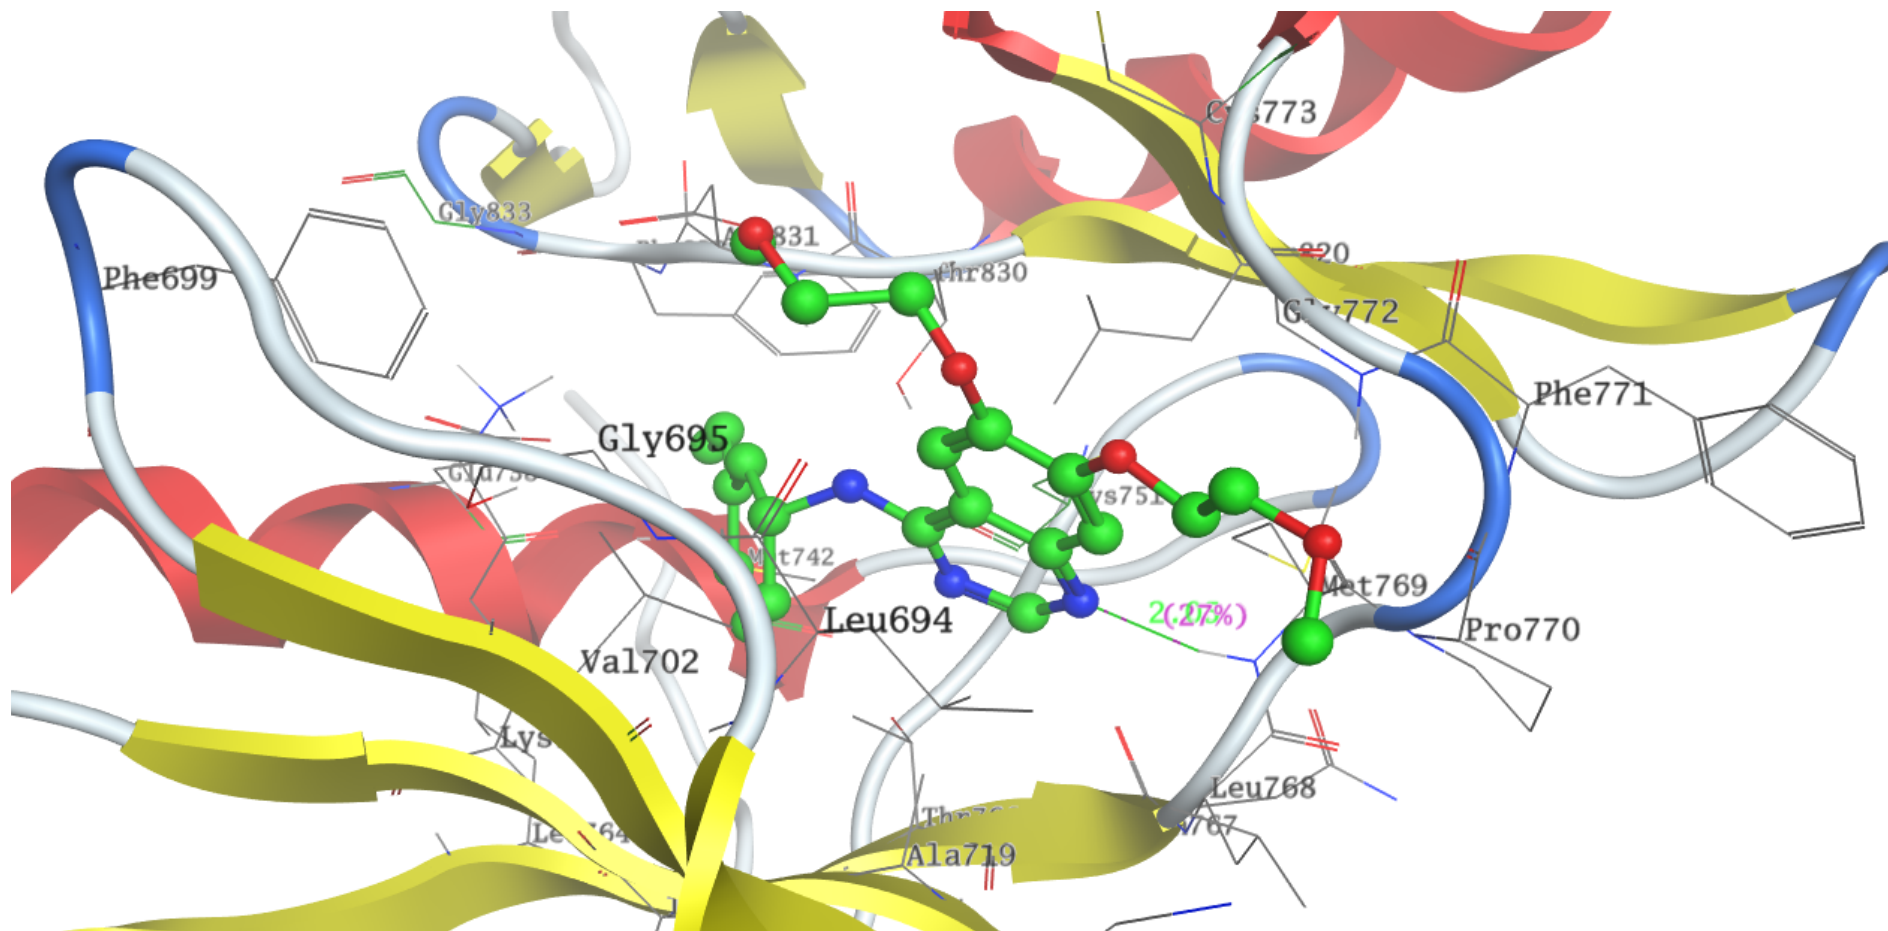

3D binding mode of co-crystallized ligand inside the EGFR binding pocket (PDB: 1M17)

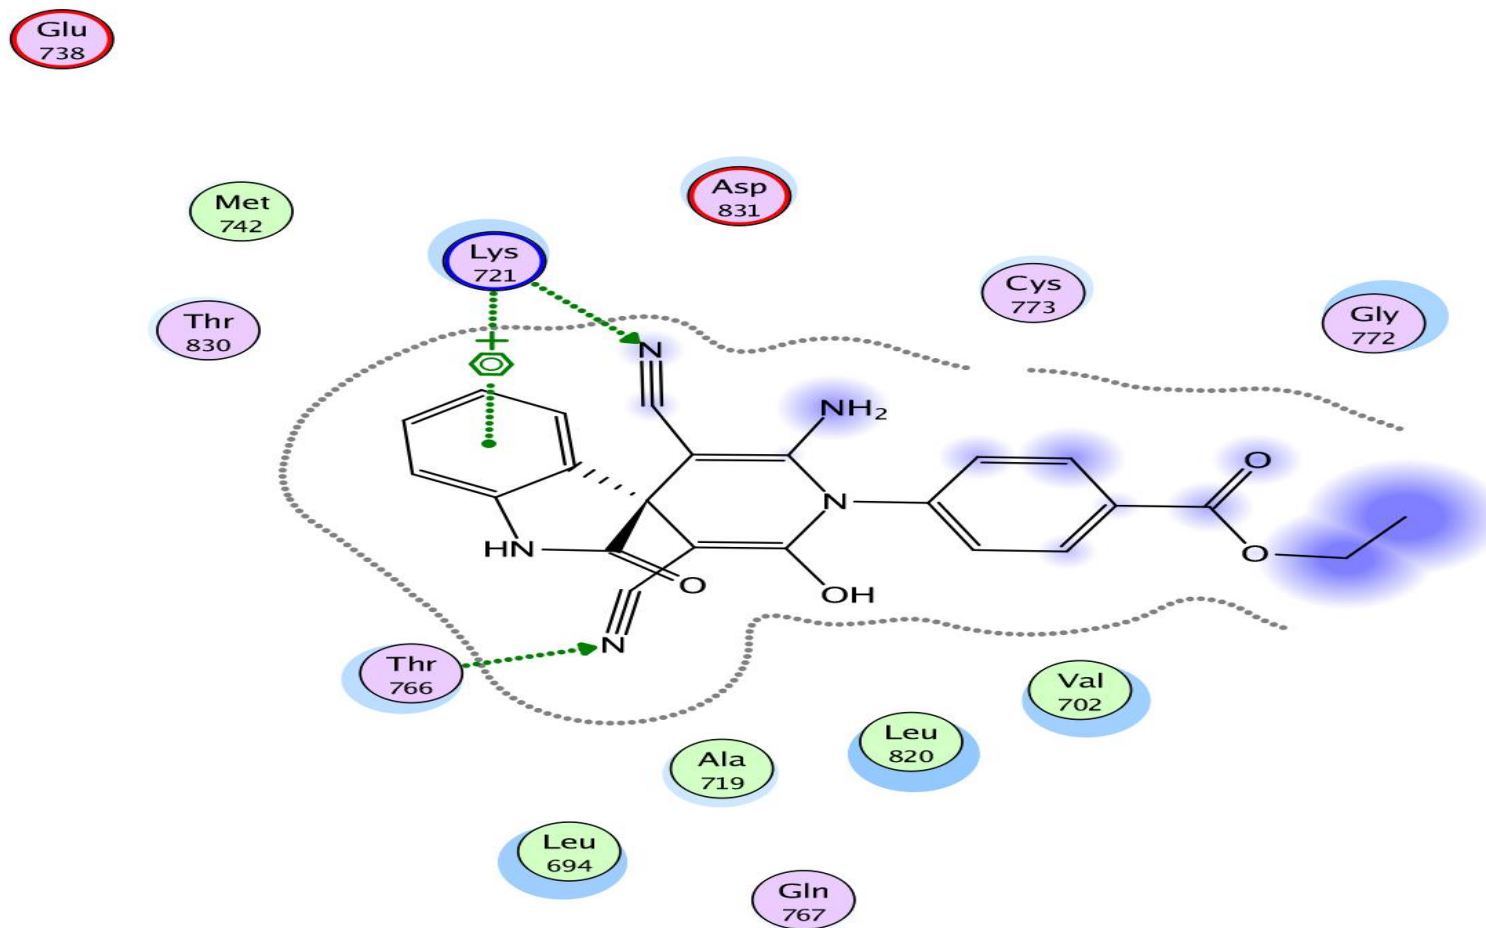

2D binding mode of 2-oxo-1H-spiro-indoline-3,4'-pyridine 7 inside the EGFR binding pocket (PDB: 1M17)

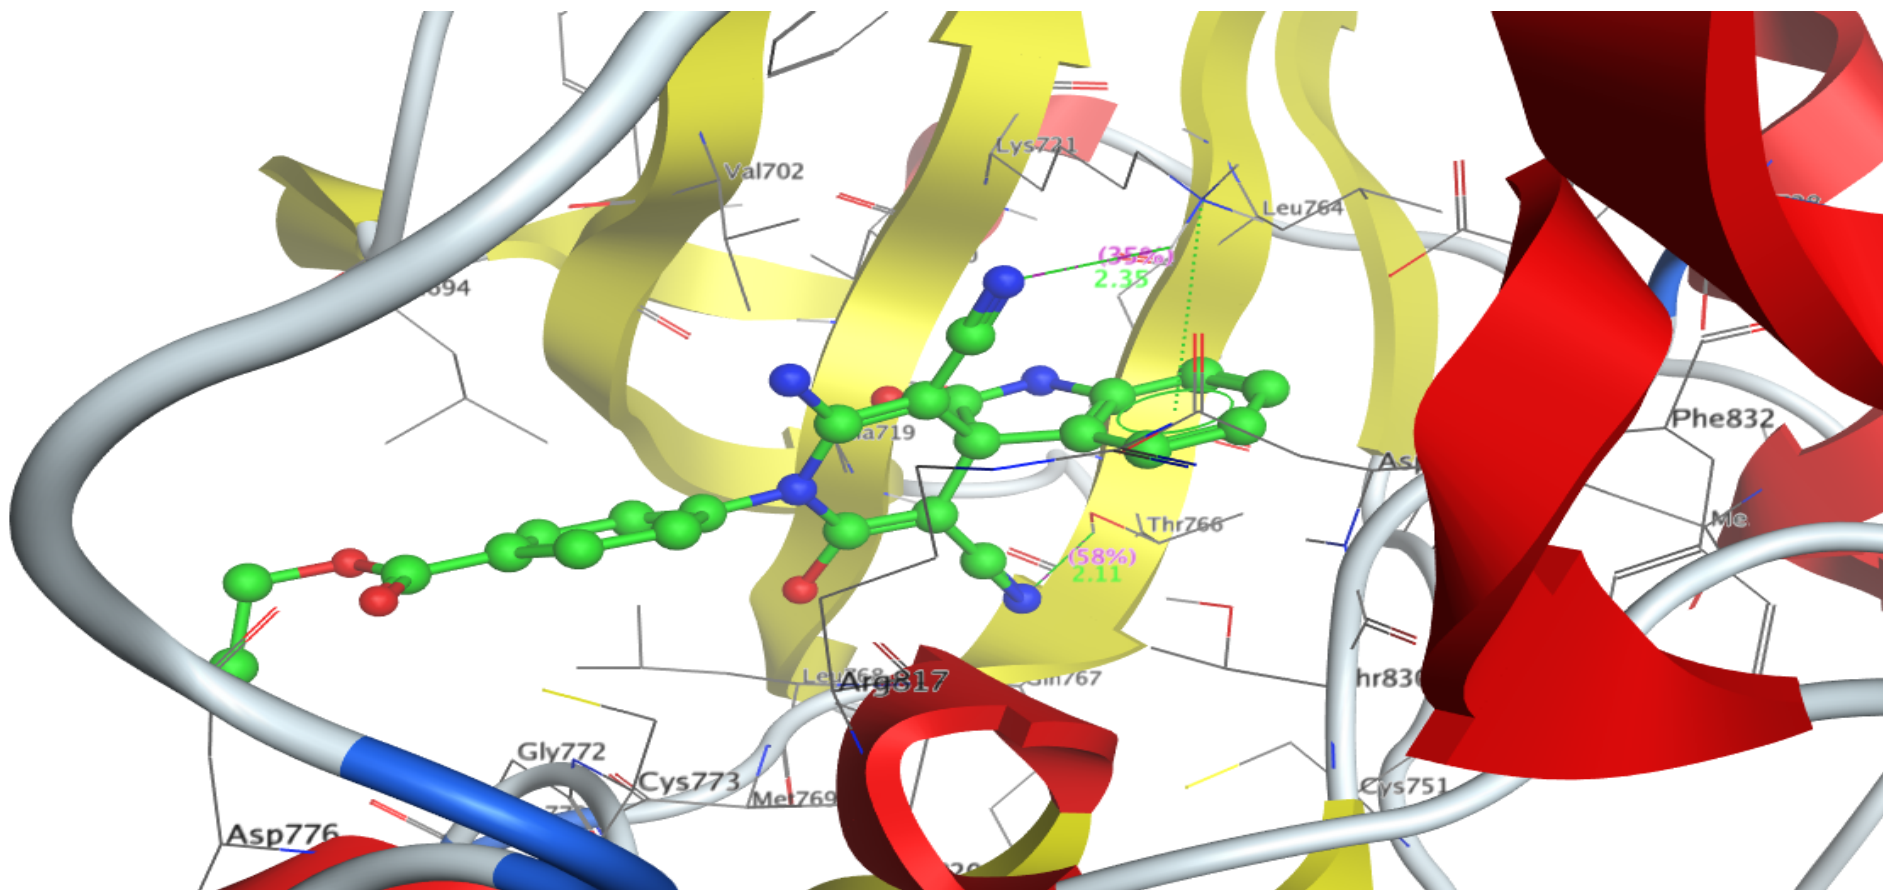

3D binding mode of 2-oxo-1'H-spiro-indoline-3,4'-pyridine 7 inside the EGFR binding pocket (PDB: 1M17)

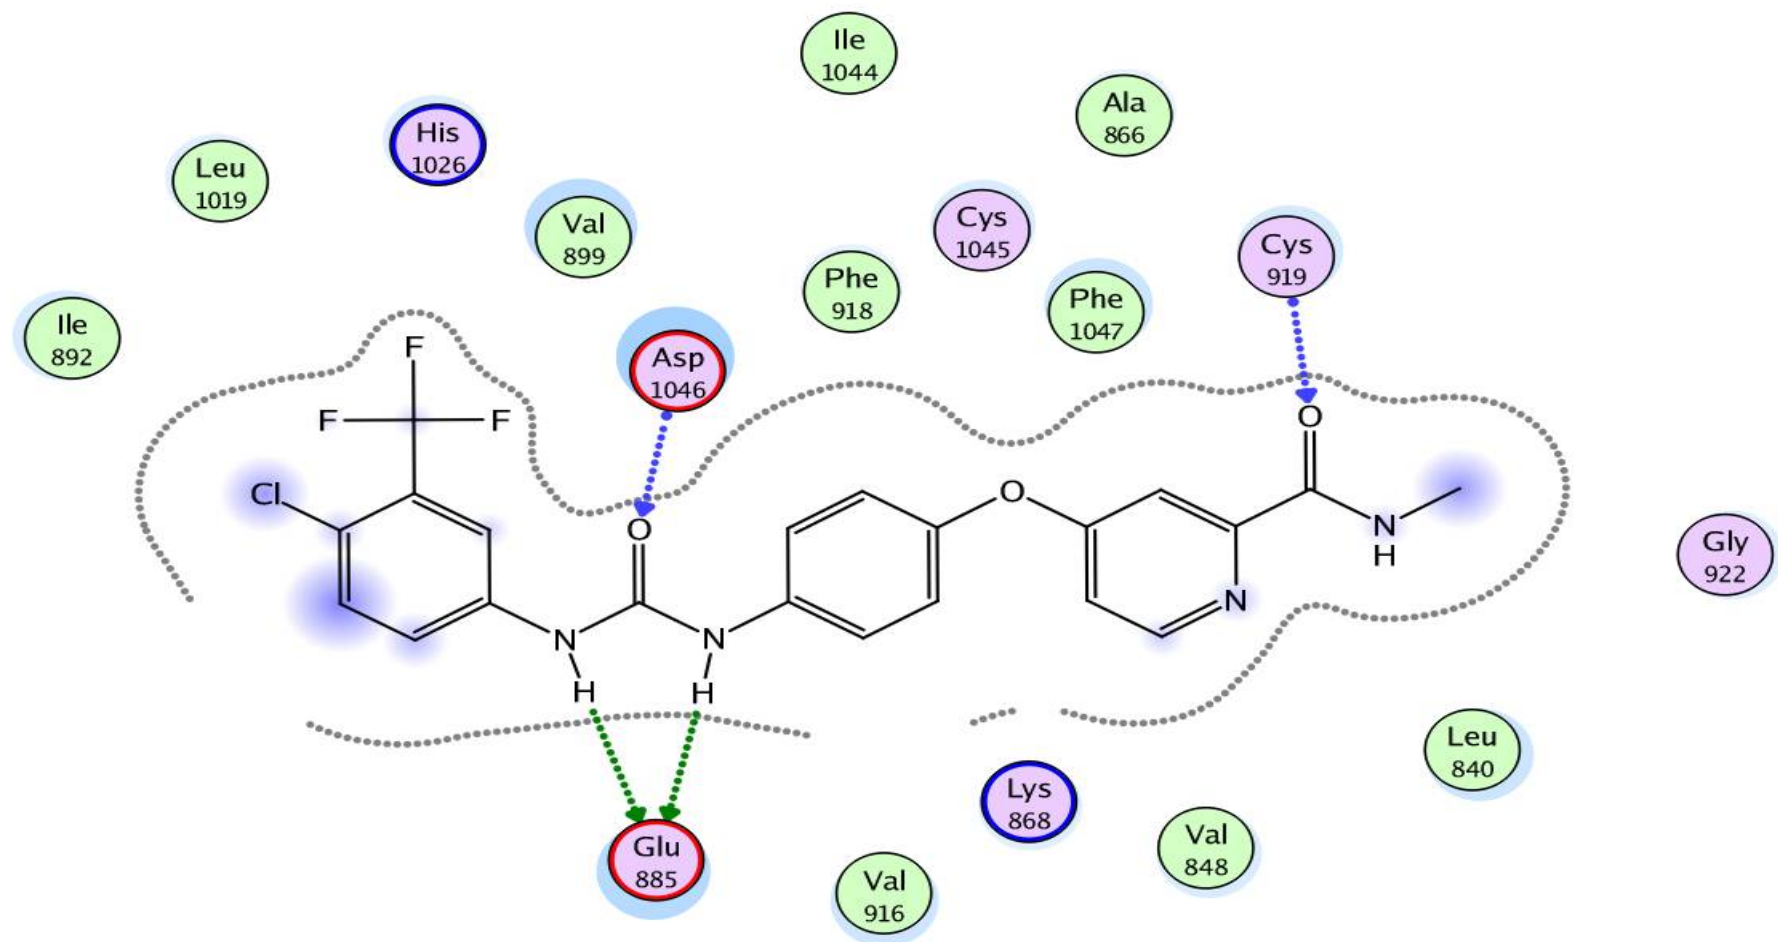

2D binding mode of co-crystallized ligand inside the VEGFR-2 binding pocket (**PDB: 4ASD**)

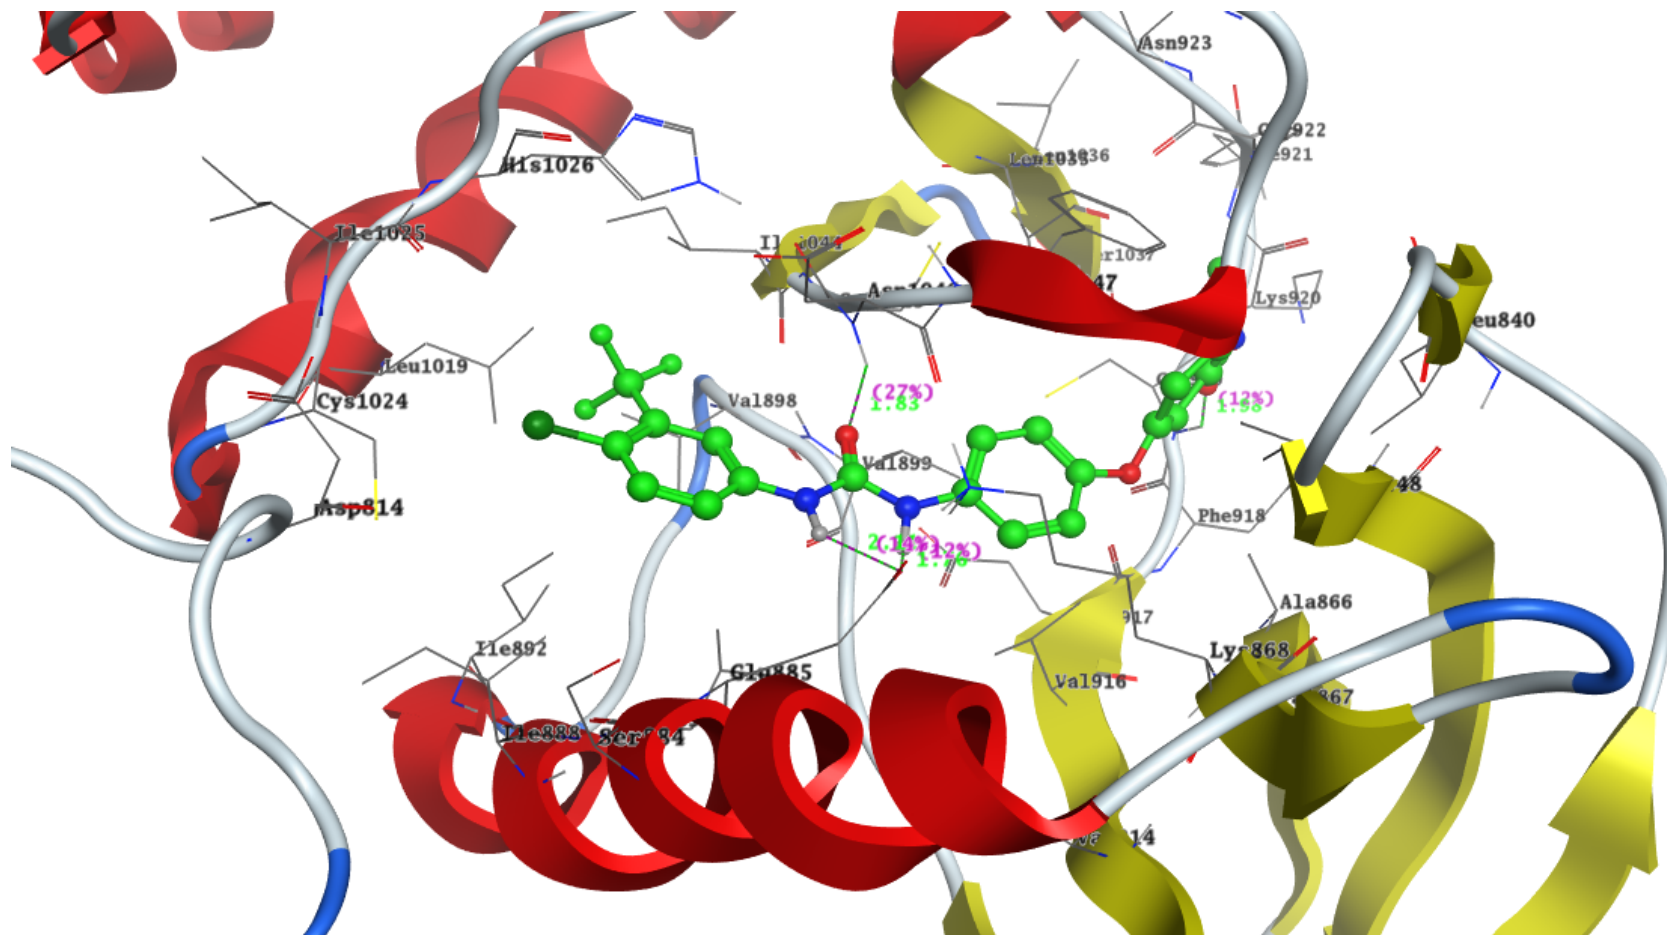

3D binding mode of co-crystallized ligand inside the VEGFR-2 binding pocket (PDB: 4ASD)

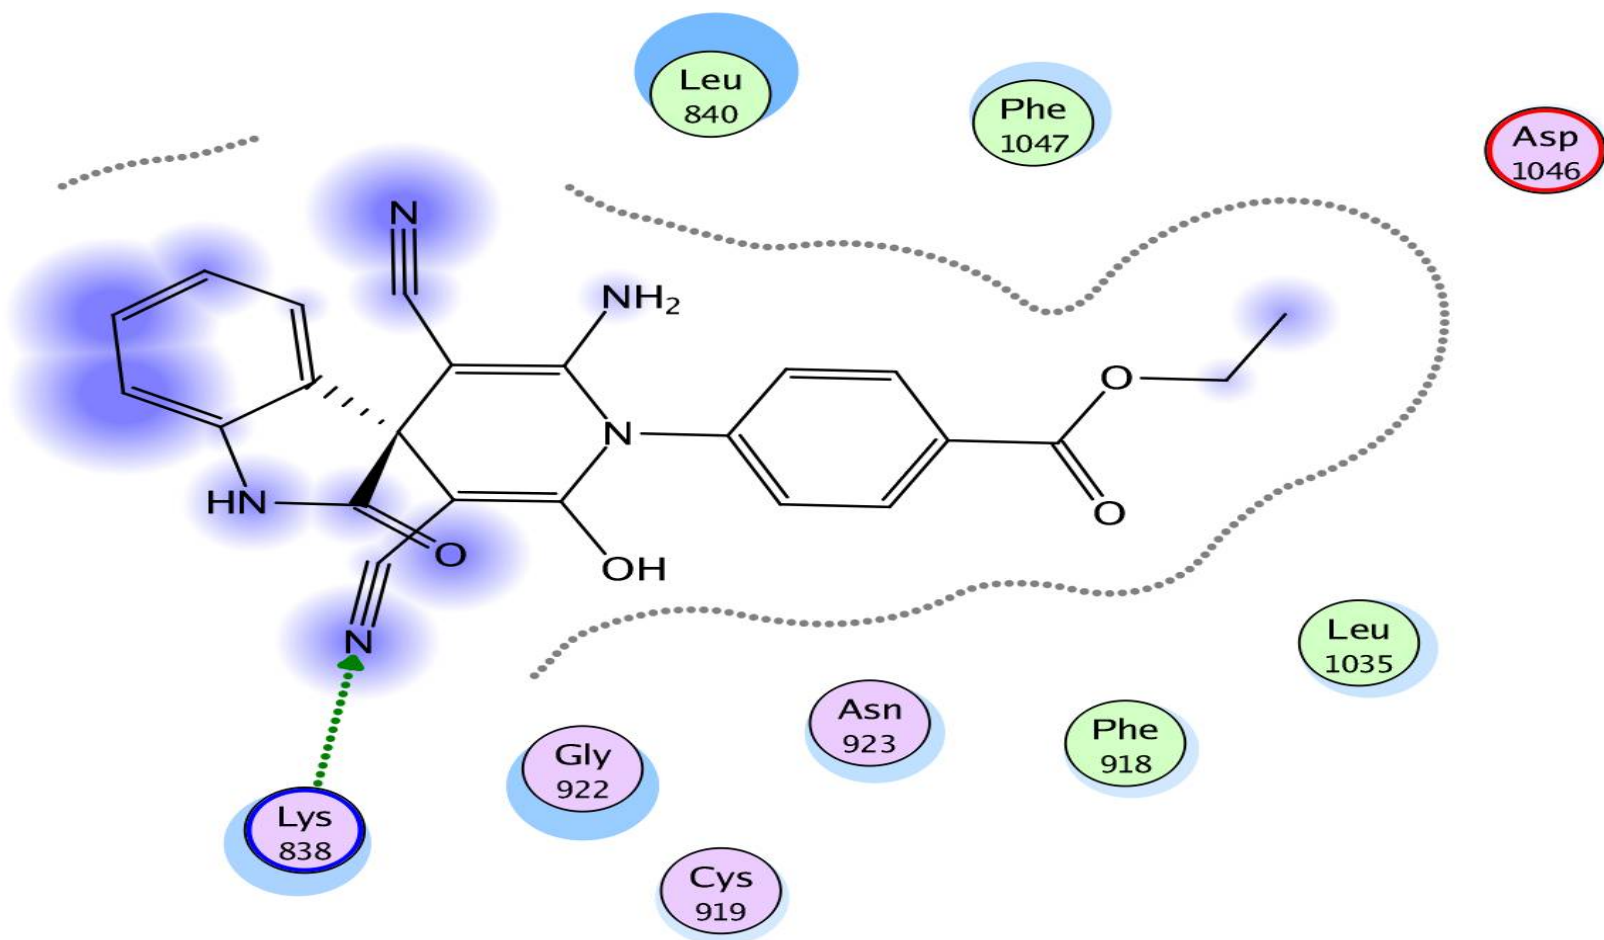

2D binding mode of 2-oxo-1'H-spiro-indoline-3,4'-pyridine **7** inside the VEGFR-2 binding pocket (**PDB**: 4ASD)

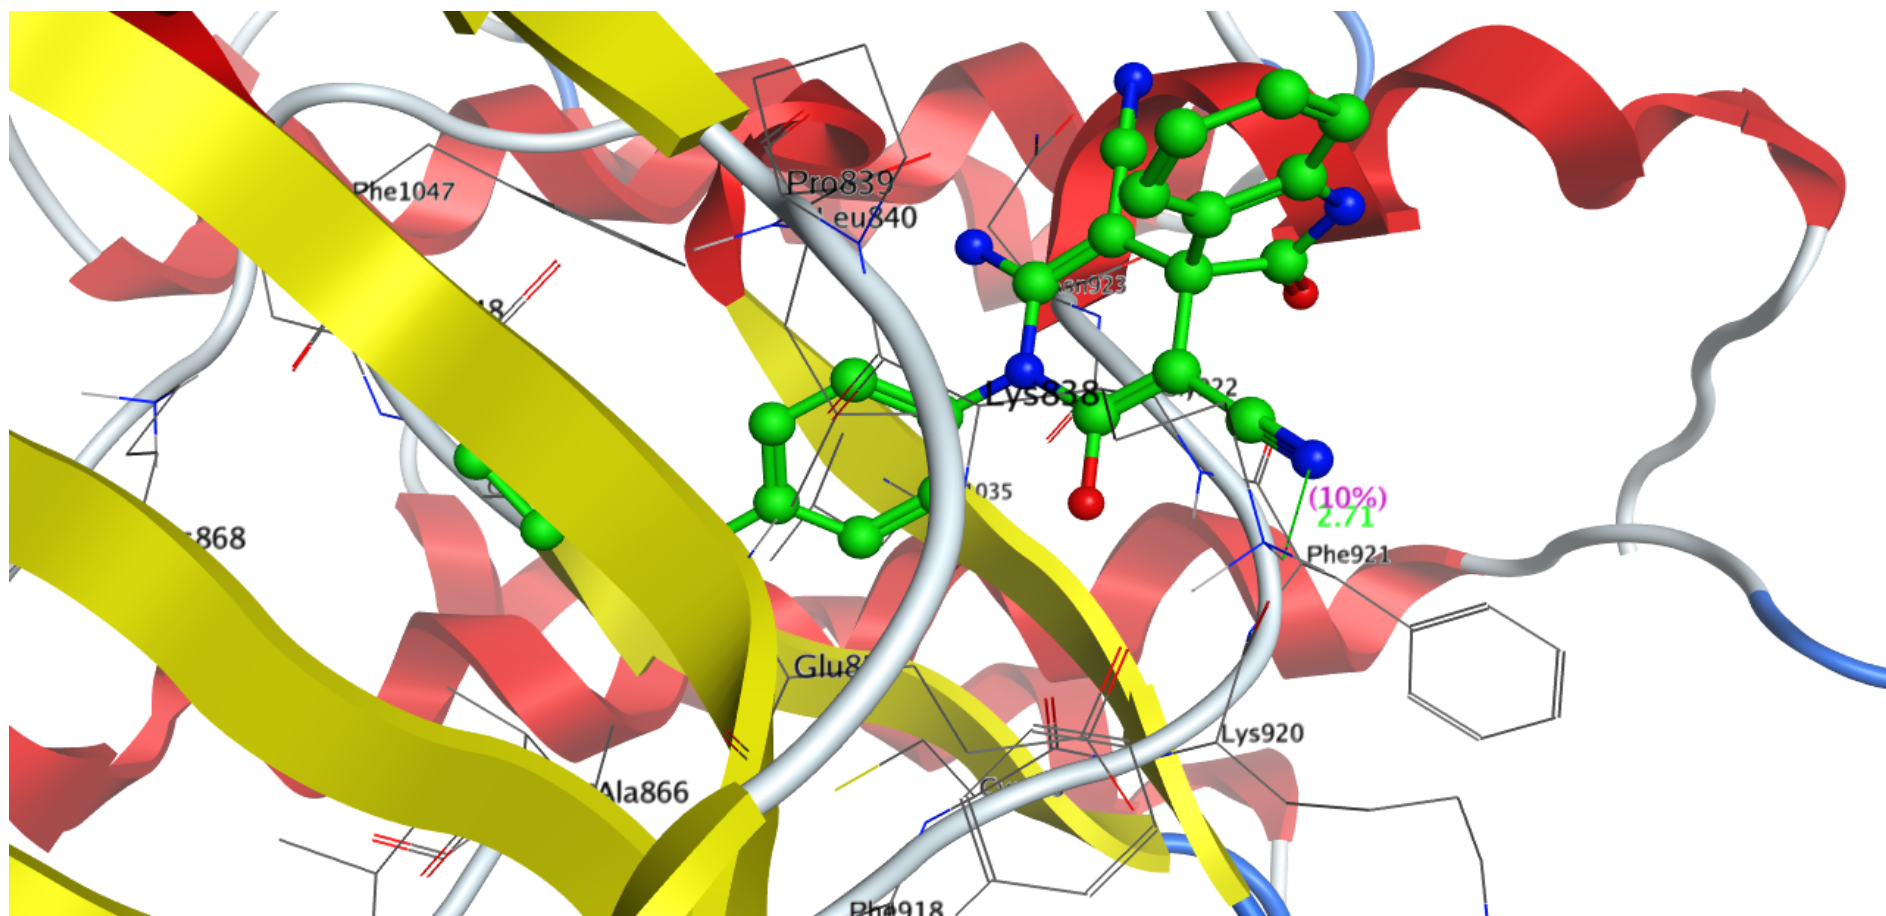

3D binding mode of 2-oxo-1'H-spiro-indoline-3,4'-pyridine **7** inside the VEGFR-2 binding pocket (**PDB: 4ASD**)
